# Supplementary material for: Theoretical study on the reaction mechanism of “ligandless” Ni-catalyzed hydrodesulfurization of aryl sulfide
Source: Royal Society of Chemistry journal article supplement (doi:10.1039/c7ra10755b), 2017-01-01
Supplement: c7ra10755b1.pdf [file c7ra10755b1.pdf]

## Supporting Information

# Theoretical Study on the Reaction Mechanism of “Ligandless” Ni-Catalyzed Hydrodesulfurization of Aryl Sulfide

*Sheng Fang, Meiyan Wang\* , Bingwen Li, Jingjing Liu, Jing-yao Liu\**

Laboratory of Theoretical and Computational Chemistry, Institute of Theoretical Chemistry, Jilin  
University, Changchun 130023, People’s Republic of China.

E-mail address: ljl121@jlu.edu.cn (J.L.); mywang858@jlu.edu.cn (M.W.)

### CONTENTS

|                                                                                |   |
|--------------------------------------------------------------------------------|---|
| 1. Figure S1.....                                                              | 2 |
| 2. Figure S2.....                                                              | 2 |
| 3. Figure S3.....                                                              | 3 |
| 4. Figure S4.....                                                              | 3 |
| 5. Figure S5.....                                                              | 4 |
| 6. Table S1.....                                                               | 4 |
| 7. References.....                                                             | 5 |
| 8. Calculated Cartesian coordinates for the involved species in the paper..... | 6 |

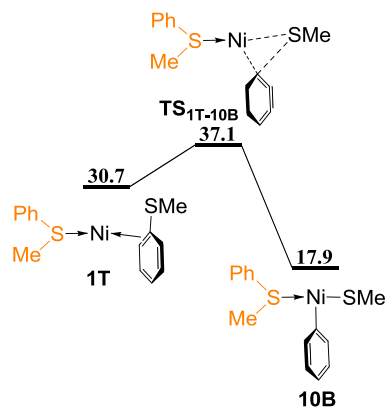

**Figure S1.** Energy profile of oxidative addition process from complex **1T** (values are given in kcal/mol).

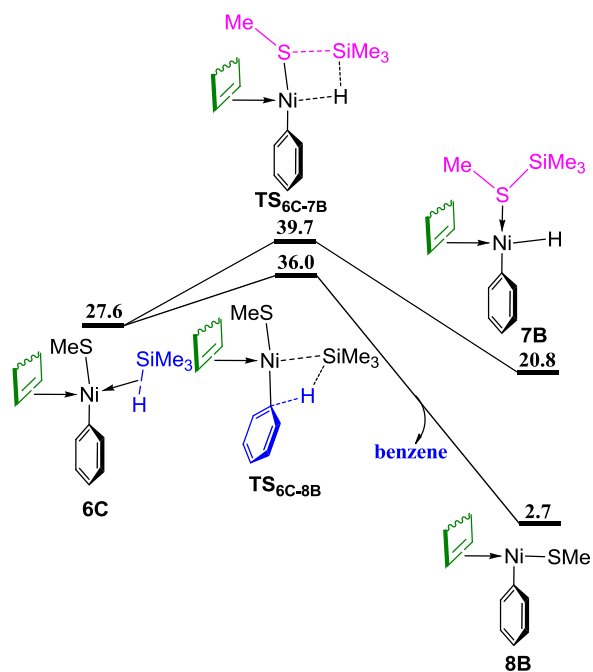

**Figure S2.** Energy profiles of  $\sigma$ -CAM process from complex **6C** with HSiMe<sub>3</sub> (values are given in kcal/mol).

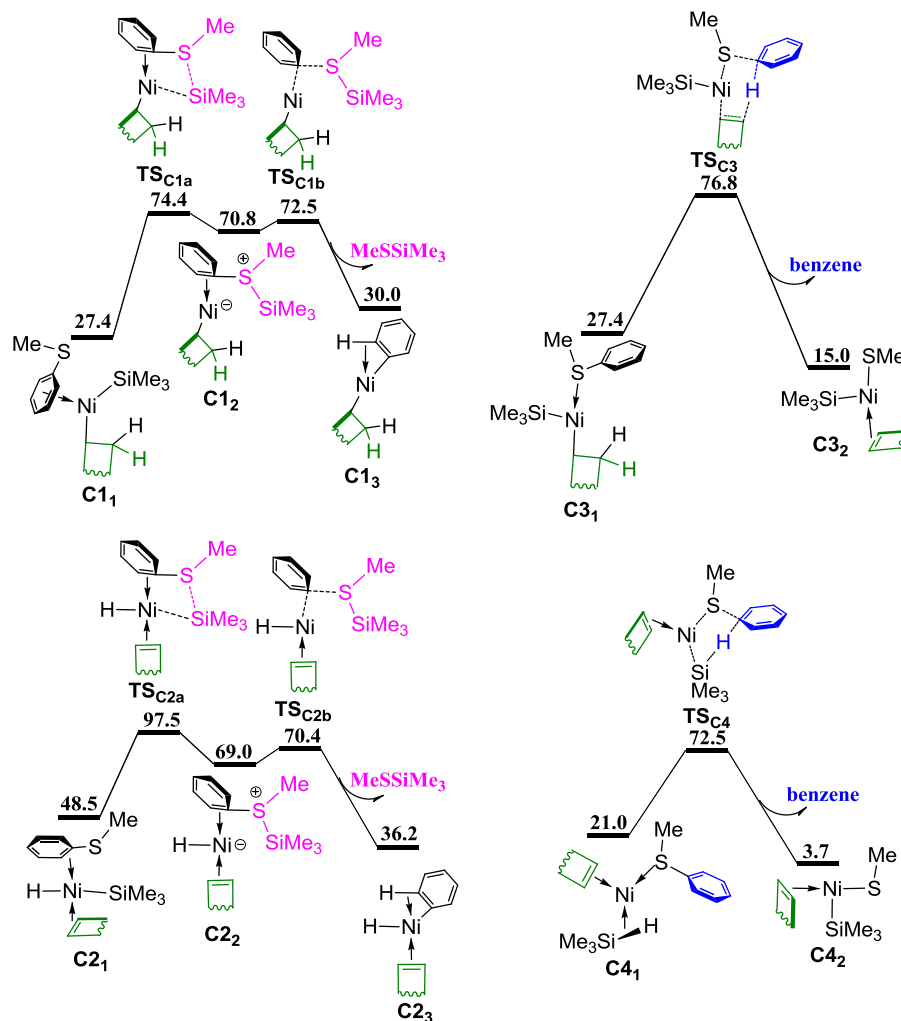

**Figure S3.** Energy profile of COD coordinated metathesis or quasi-metathesis process from various Ni-hydride species (values are given in kcal/mol).

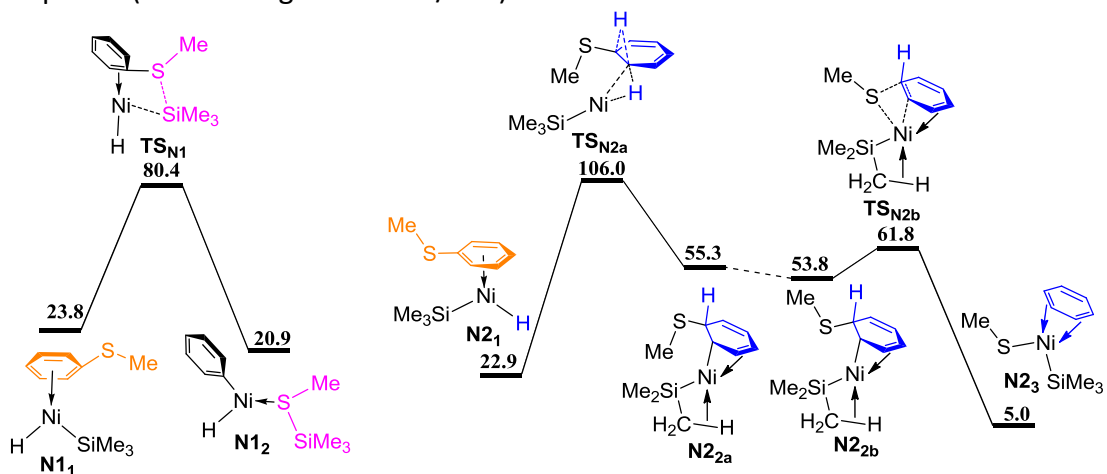

**Figure S4.** Energy profile of metathesis or quasi-metathesis process from various Ni-hydride species on “ligandless” pathways (values are given in kcal/mol).

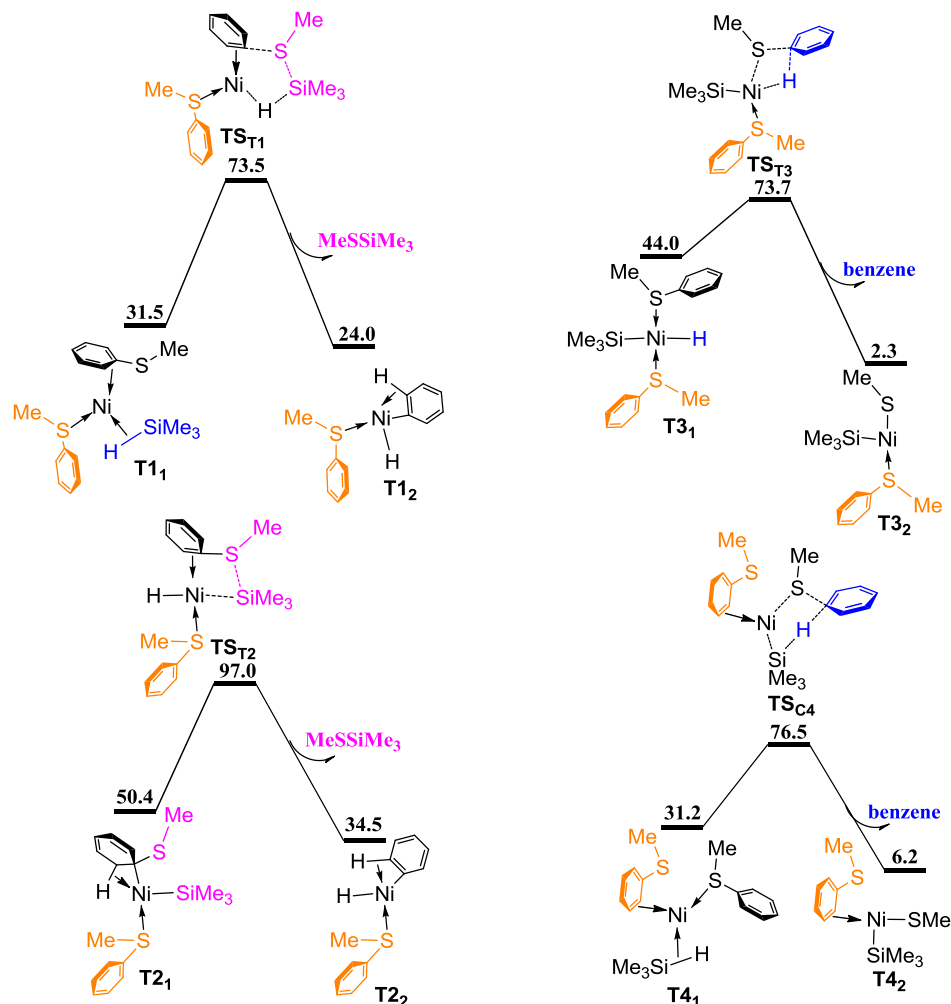

**Figure S5.** Energy profile of metathesis or quasi-metathesis process from various Ni-hydride species on PhSMe-coordinated pathways (values are given in kcal/mol).

**Table S1.** The Gibbs free energy singlet-triplet gap between complex **11** and **11<sup>3</sup>** using different post-HF and DFT methods.

| Method                     | basis set              | G( <b>11</b> )-G( <b>11<sup>3</sup></b> ) |
|----------------------------|------------------------|-------------------------------------------|
| CASMP2(12,11) <sup>α</sup> | def2-TZVP <sup>1</sup> | 4.7                                       |
| CCSD(TQ) <sup>*β,2</sup>   | def2-TZVP              | 4.3                                       |
| CCSD(T)                    | def2-TZVP              | 1.2                                       |
| QCISD(T)                   | def2-TZVP              | -1.4                                      |
| ωB97XD                     | def2-TZVP              | 6.4                                       |
| ωB97XD                     | 6-311++g(d,p)          | 6.5                                       |
| ωB97XD                     | def2-QZVPPD            | 6.2                                       |
| B3LYP <sup>*3</sup>        | def2-TZVP              | 0.4                                       |
| PBE0                       | def2-TZVP              | 8.3                                       |
| PBE                        | def2-TZVP              | -7.4                                      |
| M06                        | def2-TZVP              | -1.0                                      |

<sup>α</sup>including 12 electrons of Ni and S along with 11 orbitals, <sup>β</sup> see ref 2, estimate by the E5TT, E5TQ2 and E5QQ value using small model(HSNiCH<sub>3</sub>) calculated by QCISD(TQ)/def2-TZVP

$$\begin{aligned}
E(\text{CCSD(TQ)}) &= E(\text{CCSD(T)}) + 0.5 * E5\text{TQ1} + E5\text{TT} + E5\text{TQ2} + E5\text{QQ} \\
&= E(\text{CCSD(T)}) + E(\text{CCSD(T)}) - E(\text{QCISD(T)}) + E5\text{TT} + E5\text{TQ2} + E5\text{QQ} \\
&\approx 2 * E(\text{CCSD(T)}) - E(\text{QCISD(T)}) + E5\text{TT}_{\text{small-model}} + E5\text{TQ2}_{\text{small-model}} + E5\text{QQ}_{\text{small-model}} \\
&= 2 * E(\text{CCSD(T)}) - E(\text{QCISD(T)}) + E_{\text{corr}}(\text{TQ}^*) \\
&= E(\text{CCSD(TQ)}^*)
\end{aligned}$$

For the gap between **11** and **11<sup>3</sup>** is evaluated by  $\text{CCSD(TQ)}^*$ , the value of  $E_{\text{corr}}(\text{TQ}^*)$  is only 0.8 kcal/mol, contributing little to the overall result.

## References

- 1 (a) F. Weigend and R. Ahlrichs, *Phys. Chem. Chem. Phys.* **2005**, *7*, 3297–3305. (b) F. Weigend, *Phys. Chem. Chem. Phys.*, **2006**, *8*, 1057–1065.
- 2 K. Raghavachari, J. A. Pople, E. S. Replogle and M. Head-Gordon, *J. Phys. Chem.*, **1990**, *94*, 5579–5586.
- 3 O. Salomon, M. Reiher and B. A. Hess, *J. Chem. Phys.*, **2002**, *117*, 4729–4737.

## Calculated Cartesian coordinates for the involved species in the paper

41

### 1 B3LYP/BSI Optimized geometry (charge = 0, singlet)

|    |              |               |               |
|----|--------------|---------------|---------------|
| Ni | 5.9790478715 | 1.2368018013  | 2.5214546555  |
| C  | 6.5803553974 | 2.8360843243  | 3.7739513264  |
| C  | 7.6954665486 | 2.3022904654  | 3.1390691399  |
| C  | 8.3570214462 | 2.8576485566  | 1.892706607   |
| C  | 7.3409403484 | 3.3295614489  | 0.8284124636  |
| C  | 6.0851379517 | 2.4640987553  | 0.7980648232  |
| C  | 4.9015726383 | 2.7243526944  | 1.478476983   |
| C  | 4.6660556323 | 3.8722602263  | 2.4410122702  |
| C  | 5.8631246208 | 4.1249762096  | 3.3848806799  |
| C  | 7.1770255526 | -0.4904696097 | 2.3059755672  |
| C  | 6.1466447268 | -0.5370070329 | 1.3745911231  |
| C  | 4.876943222  | -1.3748687321 | 1.4886660027  |
| C  | 3.7013480906 | -0.58409119   | 2.1055491087  |
| C  | 4.1441158519 | 0.4094609193  | 3.1621782166  |
| C  | 5.1064688007 | 0.1821939397  | 4.138716767   |
| C  | 5.8374481665 | -1.1343386443 | 4.3820333059  |
| C  | 7.1943938992 | -1.2001734297 | 3.6459045692  |
| H  | 6.424345117  | 2.5263955957  | 4.8043466427  |
| H  | 8.3293486149 | 1.6442737277  | 3.7319111193  |
| H  | 8.9816524766 | 2.0654963475  | 1.4601356525  |
| H  | 9.0492054938 | 3.6761781343  | 2.1503547074  |
| H  | 7.0720939131 | 4.3779152439  | 0.993419292   |
| H  | 7.8158568551 | 3.2999767518  | -0.159728178  |
| H  | 6.0025417331 | 1.8191279781  | -0.0731862309 |
| H  | 3.9931582146 | 2.2849569504  | 1.0686887852  |
| H  | 3.7825032809 | 3.6302572743  | 3.0456851695  |
| H  | 4.4092829198 | 4.7939924073  | 1.8933849237  |
| H  | 6.5693911284 | 4.8262835368  | 2.9289052488  |
| H  | 5.504310184  | 4.6197805216  | 4.2954895196  |
| H  | 8.159189201  | -0.1987358329 | 1.9365490137  |
| H  | 6.4085777625 | -0.2509367526 | 0.3589750551  |
| H  | 4.5905710974 | -1.7222257492 | 0.4886315589  |
| H  | 5.0750176113 | -2.2819880755 | 2.0687900342  |
| H  | 3.1925984812 | -0.0259250259 | 1.3090469493  |
| H  | 2.9465736515 | -1.2765275936 | 2.5133327774  |
| H  | 3.4360941342 | 1.2156650338  | 3.3491140469  |
| H  | 5.0838317776 | 0.8509482502  | 4.9955963669  |
| H  | 5.2022797254 | -1.9772577881 | 4.0911087083  |
| H  | 6.0068423953 | -1.2520764532 | 5.4591708007  |
| H  | 7.9605483016 | -0.7234844812 | 4.2708520551  |
| H  | 7.5153751639 | -2.2482707035 | 3.5278823726  |

37

### 3 B3LYP/BSI Optimized geometry (charge = 0, singlet)

|    |               |              |               |
|----|---------------|--------------|---------------|
| Ni | -0.3329594936 | 0.2241579018 | 0.3157097175  |
| C  | -2.3967174247 | 0.1384331095 | 0.6614821151  |
| C  | -1.7911873947 | 0.8576159391 | 1.6730731477  |
| C  | -1.6437745964 | 2.3644046491 | 1.7438983988  |
| C  | -1.3065162406 | 3.0274607151 | 0.380492195   |
| C  | -0.3734218071 | 2.180894893  | -0.4716327637 |
| C  | -0.7560994874 | 1.2769578865 | -1.4417718448 |
| C  | -2.1743218477 | 0.8655213434 | -1.782296419  |
| C  | -3.1081136697 | 0.7248682126 | -0.5475203135 |

|   |               |               |               |
|---|---------------|---------------|---------------|
| H | -2.5865368668 | -0.9173988652 | 0.8497842185  |
| H | -1.5854745057 | 0.3327766987  | 2.6054773077  |
| H | -0.8364936228 | 2.5859662097  | 2.4530268883  |
| H | -2.5496637493 | 2.8264426395  | 2.1663854295  |
| H | -2.2245128965 | 3.2493576601  | -0.1715908223 |
| H | -0.8303692076 | 3.9961591425  | 0.5713795963  |
| H | 0.6686962594  | 2.499056018   | -0.4830965523 |
| H | -0.0034439376 | 0.9680710718  | -2.1646261356 |
| H | -2.1220125832 | -0.1019204579 | -2.2971061867 |
| H | -2.6215516137 | 1.5671754473  | -2.5034747167 |
| H | -3.5508841916 | 1.6923773122  | -0.2937557963 |
| H | -3.9463762715 | 0.0720101567  | -0.8171071306 |
| S | 2.7047702994  | 0.3959392827  | 0.2343367471  |
| C | 4.1162584877  | -0.7272270363 | 0.5804976476  |
| H | 5.0019482087  | -0.0977634107 | 0.7087989287  |
| H | 3.9439299641  | -1.2977410585 | 1.4971851254  |
| H | 4.2799134836  | -1.4135118126 | -0.2546535814 |
| C | 1.3453725118  | -0.7778331183 | 0.0061044709  |
| C | 1.3535898296  | -1.5885032157 | -1.1895804006 |
| C | 0.6169991143  | -1.2994752334 | 1.1598781269  |
| C | 0.6901224049  | -2.788683252  | -1.2512959308 |
| H | 1.910824155   | -1.2253007422 | -2.0501029827 |
| C | 0.0213448559  | -2.6051522563 | 1.071704381   |
| H | 0.8940205806  | -0.9484139494 | 2.1549961914  |
| C | 0.0222911672  | -3.3128146348 | -0.1039499914 |
| H | 0.7038543148  | -3.3654744196 | -2.1729961366 |
| H | -0.4272190634 | -3.033856563  | 1.9659597727  |
| H | -0.4480031653 | -4.2912612631 | -0.1571907011 |

37

**TS<sub>3-4</sub>** B3LYP/BSI Optimized geometry (charge = 0, singlet)

|    |               |               |               |
|----|---------------|---------------|---------------|
| Ni | 0.3611951301  | 0.3018878809  | 0.265038665   |
| C  | 2.0711560556  | 0.334453743   | -1.0778532422 |
| C  | 2.436160529   | 0.7700537441  | 0.1745389583  |
| C  | 3.0011465292  | -0.0736607387 | 1.300921613   |
| C  | 2.3707131892  | -1.4881764113 | 1.4342337288  |
| C  | 0.8769443067  | -1.515463568  | 1.1370334805  |
| C  | 0.3136912     | -1.7424504699 | -0.111325049  |
| C  | 1.040685264   | -1.977565042  | -1.42102862   |
| C  | 2.2772373234  | -1.0692996208 | -1.6228237168 |
| H  | 1.8406020517  | 1.1014261786  | -1.8180213267 |
| H  | 2.5080746491  | 1.8443005385  | 0.333269133   |
| H  | 2.8291391737  | 0.4764216808  | 2.2335278223  |
| H  | 4.0937468667  | -0.1650795143 | 1.197922105   |
| H  | 2.8945236266  | -2.1970924279 | 0.7848982099  |
| H  | 2.5376233937  | -1.8423215699 | 2.4580524883  |
| H  | 0.2252712903  | -1.6414980136 | 2.0006025319  |
| H  | -0.7357967036 | -2.0294415301 | -0.1262855508 |
| H  | 0.3255491244  | -1.7829029229 | -2.2302624671 |
| H  | 1.3317187444  | -3.0351592167 | -1.5247998285 |
| H  | 3.1610129382  | -1.5187908355 | -1.1601916336 |
| H  | 2.5020246565  | -1.0041451413 | -2.6941296808 |
| S  | -0.3469769329 | 2.0413452861  | 1.4760830494  |
| C  | -0.3374814629 | 3.5098173254  | 0.3829399665  |
| H  | -0.462172334  | 4.3947942654  | 1.0124696777  |
| H  | 0.5929620624  | 3.5955141792  | -0.1871579186 |
| H  | -1.1841935688 | 3.4494747045  | -0.3084727889 |
| C  | -1.4973302125 | 0.6155765188  | 0.5243262633  |

|   |               |               |               |
|---|---------------|---------------|---------------|
| C | -2.4235054833 | -0.095219873  | 1.3324515457  |
| C | -1.8579942448 | 0.8972559074  | -0.8189816152 |
| C | -3.5928484858 | -0.5939157411 | 0.7830549426  |
| H | -2.1997031722 | -0.2639265032 | 2.3825986897  |
| C | -3.0355243659 | 0.364220342   | -1.3603607057 |
| H | -1.2306330877 | 1.5296133766  | -1.4427358152 |
| C | -3.9066381834 | -0.3825025295 | -0.5733457935 |
| H | -4.2785271886 | -1.1560584203 | 1.4134890074  |
| H | -3.2765136145 | 0.5623358295  | -2.4027164476 |
| H | -4.830526674  | -0.7731111107 | -0.9896168183 |

37 (charge = 0, singlet)

**4** B3LYP/BSI Optimized geometry (charge = 0, singlet)

|    |               |               |               |
|----|---------------|---------------|---------------|
| Ni | 0.1014636184  | 0.4303321458  | -0.0622796319 |
| C  | 1.8950917557  | -0.362154752  | 0.7128745831  |
| C  | 1.8632489954  | -0.4953264408 | -0.6649911043 |
| C  | 2.5312597299  | 0.3908843249  | -1.6940943433 |
| C  | 2.5325834155  | 1.8917043903  | -1.324664247  |
| C  | 1.2318943909  | 2.328687012   | -0.6813258794 |
| C  | 0.967328701   | 2.3819417574  | 0.6572720327  |
| C  | 1.8655910486  | 1.9480180231  | 1.7946084779  |
| C  | 2.6872164014  | 0.6733766287  | 1.4978120326  |
| H  | 1.5541946682  | -1.2220066187 | 1.2844969064  |
| H  | 1.5312366774  | -1.4558889605 | -1.0512264475 |
| H  | 1.9975945161  | 0.2590193762  | -2.6433555286 |
| H  | 3.5604402452  | 0.0444284892  | -1.8768738274 |
| H  | 3.3748774908  | 2.1243042416  | -0.6676032305 |
| H  | 2.6864426012  | 2.4805795912  | -2.2358188298 |
| H  | 0.502560726   | 2.7926982294  | -1.3408626595 |
| H  | 0.0697338323  | 2.9156426101  | 0.9572498788  |
| H  | 1.227262887   | 1.7649989739  | 2.6668556629  |
| H  | 2.5340111709  | 2.7749127643  | 2.0790673397  |
| H  | 3.6098759115  | 0.9248976938  | 0.966443341   |
| H  | 3.0006594725  | 0.2280863415  | 2.4486981123  |
| S  | -1.7978330461 | 1.4618045449  | -0.3237880353 |
| C  | -0.8132523648 | -1.2296864905 | 0.0380715267  |
| C  | -1.1635575811 | -1.7637621975 | 1.2886455997  |
| C  | -1.0796549764 | -2.00639852   | -1.1008655764 |
| C  | -1.7535319508 | -3.028014617  | 1.3980975207  |
| H  | -0.990761059  | -1.1882529977 | 2.1963028069  |
| C  | -1.6680247898 | -3.2711605835 | -0.9957068321 |
| H  | -0.8408717098 | -1.6212075778 | -2.0907023257 |
| C  | -2.006321072  | -3.7891496552 | 0.2557738776  |
| H  | -2.0168353118 | -3.4153216722 | 2.3801850925  |
| H  | -1.8638383846 | -3.8499113216 | -1.8960015124 |
| H  | -2.4647598063 | -4.7711456491 | 0.3391770126  |
| C  | -3.3160241806 | 0.439723947   | -0.3979245765 |
| H  | -3.4562115605 | -0.1362928731 | 0.5192455912  |
| H  | -4.1490272521 | 1.1396912493  | -0.5142675078 |
| H  | -3.3013842099 | -0.2454634073 | -1.2481142998 |

37

**TS<sub>4-5A</sub>** B3LYP/BSI Optimized geometry (charge = 0, singlet)

|    |               |               |               |
|----|---------------|---------------|---------------|
| Ni | -0.0021723463 | -0.9242969796 | 0.0603246599  |
| C  | 1.9282065278  | -1.3850189176 | 0.6076418999  |
| C  | 1.8179060056  | -1.2754481267 | -0.7715328651 |
| C  | 2.266856517   | -0.1436867475 | -1.6890905139 |



|   |               |               |               |
|---|---------------|---------------|---------------|
| C | 3.48845857    | 0.6842852594  | -1.2091190179 |
| C | 3.1337533589  | 1.9466050695  | -0.452433723  |
| C | 2.4597149177  | 2.0823171985  | 0.69492667    |
| C | 1.9050742812  | 1.0496423345  | 1.6428901988  |
| C | 2.4640087891  | -0.3897886645 | 1.6269731733  |
| H | 1.8755261064  | -2.4006520379 | 0.9950511862  |
| H | 1.6693740783  | -2.2226613748 | -1.2899298277 |
| H | 1.439675428   | 0.5447649806  | -1.9110338523 |
| H | 2.51735863    | -0.6136754166 | -2.6477898374 |
| H | 4.1587329548  | 0.03614216    | -0.6319681017 |
| H | 4.0579818919  | 0.9790507222  | -2.0971795584 |
| H | 3.4254505816  | 2.8717357806  | -0.9486303769 |
| H | 2.2572364242  | 3.1039351651  | 1.018158      |
| H | 0.8080685519  | 1.02194082    | 1.5370036328  |
| H | 2.0627286213  | 1.4378328638  | 2.6583033219  |
| H | 3.5603717703  | -0.3529258441 | 1.5578333879  |
| H | 2.2490463857  | -0.8190978632 | 2.6123947998  |
| S | -1.8217484963 | 0.1702253069  | 0.2151254686  |
| C | -0.6968734451 | -2.6259000264 | 0.2928783409  |
| C | -0.9652513315 | -3.1543750633 | 1.5621851822  |
| C | -0.8931371654 | -3.4329989317 | -0.8355454796 |
| C | -1.4153109268 | -4.4709711039 | 1.6981105704  |
| H | -0.8440647778 | -2.539279969  | 2.4496978516  |
| C | -1.3466239026 | -4.7502037608 | -0.6951660734 |
| H | -0.7047772029 | -3.0452525829 | -1.8344133297 |
| C | -1.6053725996 | -5.2743950334 | 0.5713567744  |
| H | -1.6252302167 | -4.8647703924 | 2.6899885085  |
| H | -1.4936959569 | -5.3635733172 | -1.581317393  |
| H | -1.9577149487 | -6.2966427048 | 0.6802236735  |
| C | -2.9984970194 | -0.3845279604 | -1.0845120722 |
| H | -3.1244593002 | -1.4692854302 | -1.038429214  |
| H | -3.9622443006 | 0.0922481551  | -0.888973564  |
| H | -2.6596815449 | -0.0996431272 | -2.0842842503 |

37

**5A** B3LYP/BSI Optimized geometry (charge = 0, singlet)

|    |               |               |               |
|----|---------------|---------------|---------------|
| Ni | -0.4957637037 | 0.2591913535  | -0.0000277381 |
| C  | 1.4351184779  | 0.0909519741  | 0.6847260147  |
| C  | 1.3977771134  | 0.2240631014  | -0.6971195829 |
| C  | 1.5483484782  | 1.4827935041  | -1.5354309668 |
| C  | 3.0146194071  | 1.9086005597  | -1.7570282195 |
| C  | 3.8225677153  | 2.3308752341  | -0.5554564836 |
| C  | 3.4513016656  | 2.6081932509  | 0.7006892703  |
| C  | 2.0779305351  | 2.5568242188  | 1.3372509737  |
| C  | 1.6547963299  | 1.1355889019  | 1.7665278746  |
| H  | 1.5457654349  | -0.9279547967 | 1.0512527674  |
| H  | 1.5288889992  | -0.7006857589 | -1.2596831442 |
| H  | 0.9757711656  | 2.3167868366  | -1.121345982  |
| H  | 1.1057478586  | 1.2846868641  | -2.5192722287 |
| H  | 3.5466299386  | 1.0797390537  | -2.2473666692 |
| H  | 3.0260068738  | 2.7277804602  | -2.4932261453 |
| H  | 4.8866913022  | 2.4298578735  | -0.7755623949 |
| H  | 4.2525052085  | 2.8839153076  | 1.3867428794  |
| H  | 1.3113605543  | 3.0061818797  | 0.700312199   |
| H  | 2.0973087786  | 3.1734203664  | 2.2436793221  |
| H  | 2.4334064356  | 0.73364383    | 2.4303280663  |
| H  | 0.7544510423  | 1.2046654581  | 2.3966139945  |
| S  | -2.4302679446 | 1.1376826256  | 0.0565548907  |

|   |               |               |               |
|---|---------------|---------------|---------------|
| C | -0.9415322106 | -1.5274073066 | 0.1814057634  |
| C | -1.2172918207 | -2.0990049109 | 1.4302591314  |
| C | -0.947001382  | -2.3436001799 | -0.9571566933 |
| C | -1.4892750061 | -3.4662449197 | 1.5362419996  |
| H | -1.2411662334 | -1.4808797943 | 2.3236939385  |
| C | -1.2229928278 | -3.7117309678 | -0.8471026355 |
| H | -0.7438368727 | -1.9256176839 | -1.940882832  |
| C | -1.4914069684 | -4.2777401113 | 0.3993651141  |
| H | -1.7080962289 | -3.8941788536 | 2.5119300009  |
| H | -1.2239266168 | -4.3319776039 | -1.7406572477 |
| H | -1.7057101933 | -5.3397374598 | 0.4845413128  |
| C | -3.3991529147 | 0.5249271151  | -1.3821327488 |
| H | -3.3959419326 | -0.5681968718 | -1.3970550227 |
| H | -4.4287311199 | 0.8728426763  | -1.2673024172 |
| H | -3.0027603384 | 0.9025007736  | -2.3286503612 |

53

TS<sub>5A-9A</sub> B3LYP/BSI Optimized geometry (charge = 0, singlet)

|    |               |               |               |
|----|---------------|---------------|---------------|
| Ni | -1.2450611692 | -0.0778017611 | 0.2398296704  |
| C  | -0.9940504605 | 1.5141946554  | -1.0305584472 |
| C  | -1.5881395997 | 1.9101744586  | 0.1629263921  |
| C  | -0.9180986359 | 2.6103638877  | 1.3275535486  |
| C  | -0.9228356079 | 4.1498827699  | 1.1611330198  |
| C  | -0.3282679913 | 4.7282981467  | -0.1034641047 |
| C  | 0.5651426219  | 4.2044492996  | -0.9521289524 |
| C  | 1.2530913302  | 2.8619272321  | -0.8656660154 |
| C  | 0.4511018295  | 1.6895051886  | -1.4853366574 |
| H  | -1.6835181159 | 1.3134926402  | -1.8478070108 |
| H  | -2.6734391246 | 2.0153049389  | 0.1444708935  |
| H  | 0.0972656942  | 2.2404912203  | 1.4826696637  |
| H  | -1.4681237434 | 2.3751536919  | 2.2478495051  |
| H  | -1.9655398275 | 4.4931939709  | 1.2210630405  |
| H  | -0.4254559745 | 4.5942662331  | 2.0377863041  |
| H  | -0.6985938294 | 5.7270135892  | -0.3388570007 |
| H  | 0.8286451555  | 4.8083349128  | -1.8209314051 |
| H  | 1.5199582784  | 2.6277663488  | 0.1668505783  |
| H  | 2.2053069433  | 2.9165187388  | -1.4079196832 |
| H  | 0.4142857079  | 1.8348456593  | -2.5725133059 |
| H  | 1.0277787146  | 0.7652236523  | -1.3383113211 |
| S  | 2.3564036475  | 0.2534681293  | 1.6024023726  |
| C  | 3.2318757952  | -0.5929470368 | 0.2814938612  |
| C  | 2.3245975187  | -1.0164776446 | 2.9228042496  |
| C  | 4.3910987249  | -0.0039220802 | -0.241525885  |
| C  | 2.7553513118  | -1.7951330454 | -0.2630455376 |
| H  | 1.6449670844  | -1.8299056722 | 2.661019688   |
| H  | 3.3348580041  | -1.3853321336 | 3.1150716954  |
| H  | 1.9449201986  | -0.5148152325 | 3.8172397344  |
| C  | 5.0682675079  | -0.6110545808 | -1.3015577289 |
| H  | 4.7623946658  | 0.9214184729  | 0.1890163941  |
| C  | 3.4506265453  | -2.4053361858 | -1.3082818893 |
| H  | 1.842854547   | -2.2420316241 | 0.1227301271  |
| C  | 4.6037960111  | -1.8153825539 | -1.8327055568 |
| H  | 5.9660797387  | -0.1473400727 | -1.7019101402 |
| H  | 3.0802560557  | -3.339793069  | -1.7217721145 |
| H  | 5.1363710576  | -2.2918806762 | -2.6513884252 |
| S  | -0.7673509057 | -1.9119068532 | 1.238600366   |
| C  | -2.7505280713 | -0.7553730521 | -0.608574028  |
| C  | -2.2045777543 | -3.0034494474 | 1.5730169179  |

|   |               |               |               |
|---|---------------|---------------|---------------|
| C | -2.6471313159 | -1.4739638512 | -1.8070667214 |
| C | -4.0207244001 | -0.4785449592 | -0.0875970278 |
| H | -2.9848889065 | -2.4810306655 | 2.131364525   |
| H | -2.6249615149 | -3.3836649639 | 0.6395432429  |
| H | -1.8396524304 | -3.8422656427 | 2.1719503314  |
| C | -3.7988143041 | -1.9047830375 | -2.4732796098 |
| H | -1.6708261938 | -1.7129065648 | -2.2199281042 |
| C | -5.1705612971 | -0.9141141444 | -0.7565608047 |
| H | -4.1288188548 | 0.0648297449  | 0.8482024956  |
| C | -5.0642696357 | -1.625483218  | -1.952084119  |
| H | -3.702461657  | -2.4637927888 | -3.4013740943 |
| H | -6.149775821  | -0.6932991368 | -0.3375979146 |
| H | -5.9575693376 | -1.9634036175 | -2.4705909013 |

53

**9A** B3LYP/BSI Optimized geometry (charge = 0, singlet)

|    |               |               |               |
|----|---------------|---------------|---------------|
| Ni | -0.6812367528 | -0.2662537412 | 0.3000140556  |
| C  | -0.5630858445 | 1.4280129681  | -0.9797746197 |
| C  | -1.1584879116 | 1.7680207037  | 0.2255269336  |
| C  | -0.620679746  | 2.6524430482  | 1.3305468916  |
| C  | -0.9479754891 | 4.141187305   | 1.0747810957  |
| C  | -0.4063039258 | 4.7780509405  | -0.183441515  |
| C  | 0.561888227   | 4.3778004465  | -1.017805114  |
| C  | 1.4278150174  | 3.1387898738  | -0.9491144113 |
| C  | 0.7715014222  | 1.8762025273  | -1.557967399  |
| H  | -1.255329383  | 1.0846983307  | -1.7449727452 |
| H  | -2.2441311974 | 1.693831949   | 0.2437349383  |
| H  | 0.4498923821  | 2.5233805324  | 1.4866505141  |
| H  | -1.1045267007 | 2.365810242   | 2.2739865102  |
| H  | -2.0417035197 | 4.2570244562  | 1.0596972718  |
| H  | -0.6133191502 | 4.7260602525  | 1.9465361711  |
| H  | -0.8997621618 | 5.7190312252  | -0.4318900365 |
| H  | 0.7490619443  | 5.0171167525  | -1.8811795553 |
| H  | 1.7533819434  | 2.9344456522  | 0.0729279529  |
| H  | 2.3464967637  | 3.3278948704  | -1.5192845973 |
| H  | 0.5864648708  | 2.0735498565  | -2.6226764731 |
| H  | 1.5062212211  | 1.0598706217  | -1.5504007764 |
| S  | 1.6346570307  | 0.1310550665  | 1.1432031503  |
| C  | 2.8829646073  | -0.7155296713 | 0.1547832573  |
| C  | 1.8778185149  | -0.6386704418 | 2.7852086487  |
| C  | 4.0196563197  | 0.0125777517  | -0.22073006   |
| C  | 2.7354220088  | -2.0508896395 | -0.2391828993 |
| H  | 1.5671801255  | -1.6842065162 | 2.7648433376  |
| H  | 2.9268517891  | -0.5314306059 | 3.0692586255  |
| H  | 1.2447703424  | -0.0897973686 | 3.4866835939  |
| C  | 5.0115791691  | -0.5975665736 | -0.9908253609 |
| H  | 4.1239787076  | 1.0476234664  | 0.0908724866  |
| C  | 3.7375056134  | -2.6530203258 | -1.0024968062 |
| H  | 1.8452006476  | -2.6023418201 | 0.051789316   |
| C  | 4.8719882314  | -1.9309263548 | -1.3805807045 |
| H  | 5.8920413215  | -0.0311891504 | -1.2817965256 |
| H  | 3.6256348268  | -3.6902029173 | -1.3066702374 |
| H  | 5.6452735792  | -2.4059164135 | -1.9783178377 |
| S  | -0.5416721727 | -2.2498402475 | 1.2144734075  |
| C  | -2.3708999513 | -0.7390972264 | -0.4000048196 |
| C  | -1.9683128279 | -3.3832107398 | 1.0126277629  |
| C  | -2.4688739617 | -1.2685519968 | -1.6972095326 |
| C  | -3.5636450836 | -0.516518754  | 0.3062063398  |

|   |               |               |               |
|---|---------------|---------------|---------------|
| H | -2.8713188014 | -2.9781997505 | 1.473801734   |
| H | -2.171242699  | -3.5898790855 | -0.0401805713 |
| H | -1.693936358  | -4.3145343149 | 1.5172425069  |
| C | -3.712273178  | -1.5573965248 | -2.2702314171 |
| H | -1.5675053036 | -1.4718481334 | -2.2724576649 |
| C | -4.8086456712 | -0.8034238986 | -0.2637513442 |
| H | -3.5294498198 | -0.127444016  | 1.3221898745  |
| C | -4.8891033473 | -1.3238968143 | -1.5565456284 |
| H | -3.7579403993 | -1.9673008496 | -3.2771295072 |
| H | -5.7164939991 | -0.6210189641 | 0.3076383438  |
| H | -5.8556522705 | -1.5479909827 | -2.0004895605 |

53

**TS<sub>9A-10A</sub>** B3LYP/BSI Optimized geometry (charge = 0, singlet)

|    |               |               |               |
|----|---------------|---------------|---------------|
| Ni | 0.5581451206  | 0.8508157993  | 0.3550286623  |
| S  | 1.220884865   | 1.6479036241  | 2.2287368017  |
| C  | -0.2749158739 | 2.3191076255  | 3.0561936513  |
| H  | -1.0239014377 | 1.5463210211  | 3.2547502839  |
| H  | 0.0450004174  | 2.7473879805  | 4.0113157962  |
| H  | -0.7376147681 | 3.1124457391  | 2.462254071   |
| S  | 1.3298768769  | -1.3659789398 | 0.3454861793  |
| C  | 0.57710556    | -2.453896634  | 1.5644630356  |
| C  | 3.0428061485  | -1.2392767879 | 0.9775842373  |
| C  | 0.3809379356  | -2.0274859889 | 2.8840545325  |
| C  | 0.1821054625  | -3.7361600159 | 1.1658391763  |
| H  | 3.0527916068  | -0.6986624649 | 1.9269115753  |
| H  | 3.4653502147  | -2.2400046052 | 1.0883633607  |
| H  | 3.6141160637  | -0.6796420332 | 0.2325591617  |
| C  | -0.20757317   | -2.8977394799 | 3.8034655913  |
| H  | 0.6851324658  | -1.0253275934 | 3.1766704311  |
| C  | -0.4153185505 | -4.5949013837 | 2.0916934681  |
| H  | 0.3467436539  | -4.0564826429 | 0.1414950854  |
| C  | -0.6082505844 | -4.1775425761 | 3.4100705484  |
| H  | -0.3575139543 | -2.571615256  | 4.8291154945  |
| H  | -0.7219680125 | -5.5903772808 | 1.7827056255  |
| H  | -1.0687755136 | -4.8483990645 | 4.1300644502  |
| C  | -4.7308246637 | -2.1552414882 | -1.0139590203 |
| C  | -4.7767010803 | -1.9689231379 | 0.3113953407  |
| C  | -3.5556885394 | -2.3083057168 | -1.9491474749 |
| H  | -5.6926873145 | -2.2103316937 | -1.52672353   |
| C  | -3.638211221  | -1.8445285676 | 1.3021222354  |
| H  | -5.7709378515 | -1.8677397811 | 0.7479360902  |
| C  | -2.1545693039 | -1.9330640927 | -1.4181410165 |
| H  | -3.7618520792 | -1.701416126  | -2.8432990091 |
| H  | -3.5261733197 | -3.348280059  | -2.3131229983 |
| C  | -3.0148763953 | -0.4325844449 | 1.3671670512  |
| H  | -2.8593550471 | -2.5880765557 | 1.1185313364  |
| H  | -4.0267344961 | -2.0725660616 | 2.3026035617  |
| C  | -2.0319579267 | -0.4754985151 | -1.0315235012 |
| H  | -1.8798093252 | -2.5939572139 | -0.5936719954 |
| H  | -1.4332982275 | -2.1415788267 | -2.2187728433 |
| C  | -2.3961028562 | 0.1314747843  | 0.110669589   |
| H  | -3.7921935942 | 0.2756184561  | 1.6890369152  |
| H  | -2.2638353362 | -0.4196661645 | 2.172330557   |
| H  | -1.668351775  | 0.1789440029  | -1.822397713  |
| H  | -2.2648397442 | 1.21274413    | 0.1389334692  |
| C  | 0.2681070732  | 2.41652167    | -0.5516070172 |
| C  | 0.3017669174  | 2.0505182012  | -1.9103888311 |

|   |               |              |               |
|---|---------------|--------------|---------------|
| C | 0.0620749717  | 3.7659501956 | -0.2427663355 |
| C | 0.0840804647  | 2.9863455721 | -2.9269512477 |
| H | 0.4998121041  | 1.0149481361 | -2.2022788278 |
| C | -0.1605536072 | 4.7062278686 | -1.2539686107 |
| H | 0.0883033067  | 4.1003819306 | 0.7897767553  |
| C | -0.1545538567 | 4.3212718666 | -2.5968008619 |
| H | 0.1100645005  | 2.6749494136 | -3.9689649121 |
| H | -0.328331926  | 5.7483806667 | -0.9903497916 |
| H | -0.3221554978 | 5.0571893785 | -3.3790909135 |

33

**10A** B3LYP/BSI Optimized geometry (charge = 0, singlet)

|    |               |               |               |
|----|---------------|---------------|---------------|
| Ni | -0.8047498998 | -1.3271294446 | 0.0618215474  |
| S  | 0.4949679442  | -2.5133770221 | -1.0725354941 |
| C  | -0.0154706604 | 0.3404147651  | 0.1313543387  |
| C  | 0.2530340541  | 1.0853976439  | -1.027259514  |
| C  | 0.3424430739  | 0.8871984039  | 1.373896735   |
| C  | 0.8349906072  | 2.3536756343  | -0.9415527803 |
| H  | 0.0209779507  | 0.6744490181  | -2.0054628783 |
| C  | 0.9337553303  | 2.1521183465  | 1.4580122171  |
| H  | 0.1593351565  | 0.3334461468  | 2.2925432657  |
| C  | 1.178205756   | 2.8921611495  | 0.3003452993  |
| H  | 1.0324618062  | 2.9156807896  | -1.8519026353 |
| H  | 1.1992355249  | 2.557912489   | 2.4319278924  |
| H  | 1.6363028012  | 3.8758968139  | 0.3644216857  |
| C  | 1.9539831087  | -2.9042218393 | -0.0178778978 |
| H  | 2.6300504655  | -3.5372084716 | -0.5987943665 |
| H  | 2.4781261055  | -1.9819928793 | 0.2467781955  |
| H  | 1.6735858886  | -3.4345388949 | 0.8958831174  |
| S  | -2.616773546  | -0.7640353234 | 1.2413915468  |
| C  | -3.6942602004 | 0.2688793245  | 0.2350801252  |
| C  | -3.6113318021 | -2.3078135794 | 1.310047125   |
| C  | -3.5544984502 | 0.306001737   | -1.1561258918 |
| C  | -4.6643786124 | 1.0506250622  | 0.8712465951  |
| H  | -4.5608348612 | -2.1031867105 | 1.8096486229  |
| H  | -3.7906085293 | -2.7017604802 | 0.3071772776  |
| H  | -3.0407354601 | -3.0345671534 | 1.894255396   |
| C  | -4.4033843472 | 1.1140557033  | -1.9126184753 |
| H  | -2.7798369261 | -0.2862914476 | -1.6322794731 |
| C  | -5.5114954666 | 1.8547851406  | 0.1072266257  |
| H  | -4.7502951826 | 1.032903839   | 1.9537749941  |
| C  | -5.3825501476 | 1.8857811694  | -1.2830350925 |
| H  | -4.2944639275 | 1.1440047677  | -2.992979411  |
| H  | -6.2657671077 | 2.4621859594  | 0.5994999106  |
| H  | -6.0399724464 | 2.5165513427  | -1.8748086032 |

37

**5C** B3LYP/BSI Optimized geometry (charge = 0, singlet)

|    |               |               |               |
|----|---------------|---------------|---------------|
| Ni | -0.8611240748 | -0.0894362658 | 1.0417557991  |
| S  | 0.735014059   | 0.2394345731  | 2.3900980181  |
| C  | 0.4641478941  | 1.7133249168  | 3.4522754763  |
| H  | -0.3941055408 | 1.5819234431  | 4.1165564334  |
| H  | 1.3627037896  | 1.8535098548  | 4.0585250169  |
| H  | 0.3129171195  | 2.600186905   | 2.8323265453  |
| C  | -5.2158303075 | -1.3060045954 | -1.14795709   |
| C  | -4.4661722514 | -0.92029668   | -2.1884790667 |
| C  | -5.1303777339 | -0.955291797  | 0.3168383568  |

|   |               |               |               |
|---|---------------|---------------|---------------|
| H | -6.0414069699 | -1.9831011678 | -1.3734918035 |
| C | -3.2535392831 | -0.0133848686 | -2.2294422785 |
| H | -4.7427789911 | -1.341041732  | -3.155824097  |
| C | -3.8689263812 | -0.2192695088 | 0.8108261349  |
| H | -5.2446761658 | -1.8853973718 | 0.8939717392  |
| H | -6.0092457029 | -0.3476441637 | 0.5849638906  |
| C | -1.9378032871 | -0.7255419651 | -1.8513809279 |
| H | -3.3810847628 | 0.8827080787  | -1.6182095215 |
| H | -3.1353594305 | 0.3504715225  | -3.2572540812 |
| C | -2.6070413594 | -1.0449154622 | 0.6800749477  |
| H | -3.7687746449 | 0.7417010016  | 0.3063901454  |
| H | -4.0131850978 | 0.011877866   | 1.8742335168  |
| C | -1.7917545848 | -1.229590522  | -0.42930662   |
| H | -1.8249334048 | -1.6045487087 | -2.5019787906 |
| H | -1.0979701034 | -0.0638265794 | -2.0973815568 |
| H | -2.5119239994 | -1.8070451746 | 1.4628248533  |
| H | -1.1185275974 | -2.090174108  | -0.3647429151 |
| C | -0.8041831686 | 1.5905184922  | 0.2675375437  |
| C | 0.0929662384  | 1.8905470301  | -0.7674784517 |
| C | -1.7209282288 | 2.5712151429  | 0.6712797897  |
| C | 0.0457125933  | 3.1314880325  | -1.4105131883 |
| H | 0.8475821695  | 1.167092407   | -1.0639514816 |
| C | -1.7657719777 | 3.8128607873  | 0.0253674369  |
| H | -2.4036266975 | 2.3847922533  | 1.4969540503  |
| C | -0.887436177  | 4.0948535828  | -1.021348398  |
| H | 0.7500384001  | 3.3464200998  | -2.2109164101 |
| H | -2.4891523552 | 4.5584831478  | 0.3476496524  |
| H | -0.9200279839 | 5.0599225335  | -1.5198486682 |

53

**TS<sub>5c-10B</sub>** B3LYP/BSI Optimized geometry (charge = 0, singlet)

|    |               |               |               |
|----|---------------|---------------|---------------|
| Ni | -0.0506365701 | -0.1623828318 | 0.6276363983  |
| S  | -0.0751948685 | 0.2323288869  | 2.7078482036  |
| C  | 1.4027319533  | 1.1731254255  | 3.2625270812  |
| H  | 1.389168329   | 2.1820271626  | 2.8396314293  |
| H  | 1.3488453449  | 1.2541855726  | 4.3521748692  |
| H  | 2.3416591424  | 0.680297832   | 2.9945950102  |
| S  | 1.5127089096  | -1.58995986   | -0.7900199734 |
| C  | 3.1613819223  | -0.8965716041 | -0.6002470566 |
| C  | 1.6049196315  | -3.0182638866 | 0.3619709089  |
| C  | 4.2567124732  | -1.506645439  | -1.2235065144 |
| C  | 3.33027651    | 0.2827575909  | 0.1302838327  |
| H  | 2.4173587272  | -3.6825673948 | 0.0602239716  |
| H  | 1.7532206603  | -2.6766312606 | 1.3894084261  |
| H  | 0.6561369536  | -3.5565693115 | 0.2874491572  |
| C  | 5.5264601923  | -0.9441922719 | -1.0885537717 |
| H  | 4.1150166581  | -2.4092452322 | -1.8112994089 |
| C  | 4.601253253   | 0.8472328918  | 0.2500417495  |
| H  | 2.4581289529  | 0.7408447394  | 0.5848889465  |
| C  | 5.6995802807  | 0.232075468   | -0.3535017138 |
| H  | 6.3790068382  | -1.4183511732 | -1.5670833468 |
| H  | 4.7297907417  | 1.7659020984  | 0.8154224546  |
| H  | 6.6889908156  | 0.6707988307  | -0.2581099616 |
| C  | -5.2445722281 | -1.3381495311 | -0.2779761563 |
| C  | -4.880847103  | -0.9036955356 | -1.4915343918 |
| C  | -4.6073206588 | -1.1343922347 | 1.0752330994  |
| H  | -6.1557399519 | -1.9376221798 | -0.233534392  |
| C  | -3.6826407126 | -0.0677266625 | -1.8894697847 |

|   |               |               |               |
|---|---------------|---------------|---------------|
| H | -5.5183779028 | -1.2087155484 | -2.3222304909 |
| C | -3.1739209646 | -0.565286617  | 1.1295738861  |
| H | -4.6211087706 | -2.1020079202 | 1.5995828164  |
| H | -5.2598602483 | -0.4804364453 | 1.6758598132  |
| C | -2.3769992295 | -0.8788727514 | -2.0411063137 |
| H | -3.520249639  | 0.766432955   | -1.2038201649 |
| H | -3.889632072  | 0.3922987716  | -2.8636036149 |
| C | -2.1550298404 | -1.4779653285 | 0.4806835896  |
| H | -3.1470917851 | 0.4348144268  | 0.6971203633  |
| H | -2.902313597  | -0.4387306983 | 2.1830839596  |
| C | -1.875263537  | -1.633531954  | -0.8339691466 |
| H | -2.512530667  | -1.6151734567 | -2.8461295067 |
| H | -1.5863663676 | -0.1992676772 | -2.3938831397 |
| H | -1.7365194297 | -2.2310677344 | 1.1529248061  |
| H | -1.2102839569 | -2.4590127804 | -1.0918227553 |
| C | -0.3034719845 | 1.5009923187  | -0.1165608833 |
| C | 0.316464274   | 1.746941078   | -1.3561474071 |
| C | -1.1629537562 | 2.4936968766  | 0.3901989357  |
| C | 0.0753500915  | 2.9266016239  | -2.0696881829 |
| H | 1.0074680545  | 1.0243970454  | -1.7849714353 |
| C | -1.4044714916 | 3.6718099766  | -0.3237354355 |
| H | -1.6396635704 | 2.3526010109  | 1.3542595382  |
| C | -0.7890757022 | 3.894008638   | -1.5571520353 |
| H | 0.56867079    | 3.0849985568  | -3.0263094816 |
| H | -2.0748667734 | 4.4209049287  | 0.0924413503  |
| H | -0.976154121  | 4.8117466151  | -2.108909131  |

33

**10B** B3LYP/BSI Optimized geometry (charge = 0, singlet)

|    |               |               |               |
|----|---------------|---------------|---------------|
| Ni | 1.3955145635  | 1.1455149194  | 0.9448501744  |
| S  | 1.0690927223  | 1.4213779339  | 2.9940883918  |
| C  | 1.5606337843  | 3.1470646567  | 3.412282565   |
| H  | 0.92088951    | 3.854471136   | 2.8780410025  |
| H  | 1.4176117498  | 3.2874468905  | 4.4869957601  |
| H  | 2.6060519819  | 3.3500019691  | 3.1653697087  |
| S  | 2.3221887716  | 0.4469298679  | -0.960482387  |
| C  | 3.6626994049  | -0.6655964082 | -0.4937975925 |
| C  | 1.1478934881  | -0.7174122254 | -1.7540347601 |
| C  | 4.5070675641  | -1.1831234998 | -1.4831872641 |
| C  | 3.8864797965  | -0.9646356533 | 0.8536914805  |
| H  | 1.5743605351  | -1.0804426079 | -2.6911852227 |
| H  | 0.9235879427  | -1.5522385674 | -1.0873282641 |
| H  | 0.2389266133  | -0.1450270626 | -1.9497788999 |
| C  | 5.5598354597  | -2.023321199  | -1.1206654915 |
| H  | 4.3450332394  | -0.9267961408 | -2.526396441  |
| C  | 4.9506703761  | -1.7951444337 | 1.2092261056  |
| H  | 3.2388491185  | -0.5455246713 | 1.6208874876  |
| C  | 5.7832399548  | -2.329281273  | 0.2246030975  |
| H  | 6.2123472344  | -2.4297331551 | -1.8884059767 |
| H  | 5.1231667711  | -2.0247409602 | 2.2568034905  |
| H  | 6.6087562242  | -2.9780015135 | 0.5036536964  |
| C  | -0.0414631667 | 1.9420144596  | 0.095770829   |
| C  | 0.1605497164  | 3.0556115518  | -0.735947649  |
| C  | -1.3493052795 | 1.4557244303  | 0.2521951904  |
| C  | -0.9116940334 | 3.6568002767  | -1.4041833075 |
| H  | 1.1593375826  | 3.4649727983  | -0.8735098084 |
| C  | -2.4189866162 | 2.0517360446  | -0.4236312487 |
| H  | -1.5442035784 | 0.6173906177  | 0.9153497817  |

|   |               |              |               |
|---|---------------|--------------|---------------|
| C | -2.2051501618 | 3.1544779367 | -1.253558703  |
| H | -0.7313609489 | 4.5175404095 | -2.0446313403 |
| H | -3.4245595631 | 1.6592581447 | -0.2882139749 |
| H | -3.0387517573 | 3.6204383278 | -1.7727634304 |

37

**TS<sub>5A-11</sub>** B3LYP/BSI Optimized geometry (charge = 0, singlet)

|    |               |               |               |
|----|---------------|---------------|---------------|
| Ni | -0.5725228469 | 0.6124787783  | -0.0936931529 |
| S  | -1.230232856  | 2.4583759236  | -0.8005510962 |
| C  | -2.0873579291 | -0.4163763322 | -0.038013016  |
| C  | -2.0982113494 | 3.2803791644  | 0.5993499219  |
| C  | -2.3841213002 | -1.0477394745 | 1.1818542444  |
| C  | -2.9103655964 | -0.6718872214 | -1.1452006291 |
| H  | -2.9752852952 | 2.6981133161  | 0.8926891875  |
| H  | -1.4486027789 | 3.4225916274  | 1.4670412088  |
| H  | -2.4314113743 | 4.2599650593  | 0.2451105982  |
| C  | -3.4608319983 | -1.9340241832 | 1.2857973762  |
| H  | -1.7781172709 | -0.8563910262 | 2.0665733941  |
| C  | -3.9840433413 | -1.5609550442 | -1.0404769243 |
| H  | -2.7212056828 | -0.1702701339 | -2.0892070867 |
| C  | -4.2621786264 | -2.19464058   | 0.1728977061  |
| H  | -3.6724573467 | -2.4175198099 | 2.2369704256  |
| H  | -4.6100997696 | -1.7515630307 | -1.9092629646 |
| H  | -5.1021156484 | -2.8800189335 | 0.2524934824  |
| C  | 2.0999234576  | -1.9827920042 | -0.1048760007 |
| C  | 3.1050226615  | -1.8443411059 | -0.9784673684 |
| C  | 1.3419677478  | -0.944420461  | 0.6819809516  |
| H  | 1.7469449731  | -2.9972673116 | 0.0793345322  |
| C  | 3.8122712903  | -0.5880275701 | -1.4360503401 |
| H  | 3.4980178062  | -2.7683726178 | -1.4026657385 |
| C  | 1.9594007824  | 0.46881834    | 0.8038056869  |
| H  | 1.1688054657  | -1.3353778558 | 1.6932455751  |
| H  | 0.3079315254  | -0.9468330508 | 0.2421399725  |
| C  | 4.91874195    | -0.1169932431 | -0.4660011233 |
| H  | 3.108099982   | 0.2255936697  | -1.6263046219 |
| H  | 4.2888128159  | -0.7929843246 | -2.4021588022 |
| C  | 3.3150268296  | 0.472510493   | 1.4788223823  |
| H  | 2.0018070032  | 0.9508014959  | -0.1774458117 |
| H  | 1.2819307249  | 1.0863677461  | 1.4093662181  |
| C  | 4.5189043102  | 0.2347071409  | 0.9452867948  |
| H  | 5.6850632827  | -0.9034291119 | -0.404582876  |
| H  | 5.4337157748  | 0.7477463709  | -0.9134266488 |
| H  | 3.2868464881  | 0.6906471415  | 2.5458075414  |
| H  | 5.3668381397  | 0.3006441591  | 1.6284940014  |

17

**11** B3LYP/BSI Optimized geometry (charge = 0, singlet)

|    |              |               |               |
|----|--------------|---------------|---------------|
| Ni | 1.0597850427 | -0.8501320319 | -0.0197543255 |
| S  | 2.2433628744 | -2.4253268168 | -0.5945756448 |
| C  | 1.9030721368 | 0.7386655143  | 0.0943917673  |
| C  | 3.1518229329 | -2.9556162973 | 0.9181403419  |
| C  | 1.9062327088 | 1.3425201292  | 1.3635332291  |
| C  | 2.3484214127 | 1.4739171388  | -1.0151725605 |
| H  | 3.8288488477 | -2.1650774501 | 1.2513337929  |
| H  | 2.4793724706 | -3.2305852851 | 1.7338353273  |
| H  | 3.7474385039 | -3.8303822742 | 0.6420355762  |
| C  | 2.3009765121 | 2.6764312428  | 1.5108598537  |



|   |              |              |               |
|---|--------------|--------------|---------------|
| H | 1.6094635632 | 0.7804851166 | 2.2471736969  |
| C | 2.7518894233 | 2.8021842147 | -0.8624031047 |
| H | 2.3882625371 | 1.0092585791 | -1.9964891702 |
| C | 2.7246237734 | 3.4055740083 | 0.3985730998  |
| H | 2.2901094047 | 3.1387267755 | 2.4951436475  |
| H | 3.0920090142 | 3.3665086513 | -1.7274984615 |
| H | 3.0436998415 | 4.4381237847 | 0.5144429347  |

43

**TS<sub>11-10A</sub>** B3LYP/BSI Optimized geometry (charge = 0, singlet)

|    |               |               |               |
|----|---------------|---------------|---------------|
| Ni | 0.8607410288  | 0.3810671341  | -0.9598481551 |
| S  | 0.8774263564  | 2.4239864783  | -1.2513440569 |
| C  | 2.4647093589  | -0.2379067969 | -0.4062634165 |
| C  | 0.6431532091  | 3.1754189052  | 0.4154409747  |
| C  | 3.6875332488  | -0.0286249008 | -1.0592150699 |
| C  | 2.3933802937  | -1.1555473486 | 0.6547294299  |
| H  | 0.5639021698  | 4.2567093424  | 0.2705048973  |
| H  | -0.2632814546 | 2.8168096677  | 0.9090837046  |
| H  | 1.5095849578  | 2.9710332265  | 1.0488104429  |
| C  | 4.8161178973  | -0.7597480193 | -0.6797309052 |
| H  | 3.7612266758  | 0.7048553721  | -1.8564392596 |
| C  | 3.5255314962  | -1.8913863682 | 1.0233206647  |
| H  | 1.4650837982  | -1.3055114837 | 1.2037634838  |
| C  | 4.7361362975  | -1.693514944  | 0.3575349992  |
| H  | 5.7608730197  | -0.5970974062 | -1.1932039368 |
| H  | 3.4610489115  | -2.6069398692 | 1.8397309424  |
| H  | 5.6180261099  | -2.2563296056 | 0.6525064402  |
| S  | -1.3970536303 | -2.3304207477 | 0.5810282238  |
| C  | -2.736937828  | -1.1412955437 | 0.4646714768  |
| C  | -0.7409535824 | -2.3006928231 | -1.1247313881 |
| C  | -2.5057796572 | 0.168394496   | 0.0257005551  |
| C  | -4.0217702762 | -1.5176151637 | 0.874229103   |
| H  | -1.5003561311 | -2.5910762007 | -1.8545002748 |
| H  | -0.3631143315 | -1.3012147692 | -1.3987291546 |
| H  | 0.0970953392  | -3.0010279211 | -1.1591755967 |
| C  | -3.5530784421 | 1.0861267064  | -0.0278328771 |
| H  | -1.5043572412 | 0.4694522569  | -0.2760732325 |
| C  | -5.0631088449 | -0.5869440035 | 0.8438858648  |
| H  | -4.2029172137 | -2.5348455301 | 1.208379062   |
| C  | -4.8341824517 | 0.7119937013  | 0.3871261422  |
| H  | -3.3629439408 | 2.0952615537  | -0.3828458042 |
| H  | -6.0576244476 | -0.8845338536 | 1.1652521323  |
| H  | -5.6486276953 | 1.4302584582  | 0.3542155881  |

53

**TS<sub>5A-9B</sub>** B3LYP/BSI Optimized geometry (charge = 0, singlet)

|    |               |               |               |
|----|---------------|---------------|---------------|
| Ni | -0.7686387912 | 0.9266101377  | 0.0874691464  |
| S  | -2.1254045157 | 2.4720099515  | -0.3855441167 |
| C  | -1.502776292  | 4.1960070752  | -0.4171308715 |
| H  | -1.0658316769 | 4.4825520629  | 0.5416211167  |
| H  | -0.7677976627 | 4.3514239099  | -1.2092561083 |
| H  | -2.3783221699 | 4.8235556487  | -0.6136246286 |
| S  | 1.753949361   | -1.4743123467 | 1.7620015584  |
| C  | 2.6461716183  | -1.8583545919 | 0.2600780337  |
| C  | 1.3083750053  | -3.1155757562 | 2.4205298541  |
| C  | 3.2716236756  | -0.7801101698 | -0.3880225381 |
| C  | 2.7365125016  | -3.1419195519 | -0.2940416038 |

|   |               |               |               |
|---|---------------|---------------|---------------|
| H | 0.5996085841  | -3.6397889691 | 1.7732570426  |
| H | 2.1973013195  | -3.7320695194 | 2.5795783532  |
| H | 0.8313371976  | -2.928768178  | 3.386200463   |
| C | 3.9720467897  | -0.9912200829 | -1.5733598265 |
| H | 3.2123554846  | 0.218118163   | 0.0353097751  |
| C | 3.4489727091  | -3.3412867083 | -1.4801178085 |
| H | 2.2602240319  | -3.990428868  | 0.184959917   |
| C | 4.0672172322  | -2.2716590892 | -2.1259949042 |
| H | 4.4484319255  | -0.1465743358 | -2.0637640358 |
| H | 3.5142347052  | -4.3429447416 | -1.8973444123 |
| H | 4.6182940031  | -2.4322088741 | -3.0482808323 |
| C | -1.4461420279 | -0.9211607926 | -0.5531205445 |
| C | -1.9071262503 | -0.7177157461 | 0.7331171357  |
| C | -2.189562778  | -0.9507481311 | -1.8765998676 |
| H | -0.4493100901 | -1.371921325  | -0.6160621993 |
| C | -3.3152407665 | -0.4243582778 | 1.2091198156  |
| H | -1.2372138531 | -1.0630110805 | 1.5248550876  |
| C | -3.7317501309 | -0.9528895601 | -1.8255446779 |
| H | -1.8598349097 | -1.8604784704 | -2.3985766476 |
| H | -1.8569146391 | -0.1124986395 | -2.5027938405 |
| C | -4.1733536619 | -1.697044611  | 1.3569931683  |
| H | -3.8166909639 | 0.3028137094  | 0.5706173901  |
| H | -3.2477743918 | 0.0535423613  | 2.1939916708  |
| C | -4.314369365  | -2.1948823021 | -1.1836733991 |
| H | -4.088837128  | -0.0349704709 | -1.3537110829 |
| H | -4.0866882476 | -0.9053552229 | -2.8622870862 |
| C | -4.4808813081 | -2.492197011  | 0.1116850039  |
| H | -3.6833692404 | -2.3733493326 | 2.0744785651  |
| H | -5.1240467436 | -1.4173979946 | 1.838463964   |
| H | -4.6143233471 | -2.9676227182 | -1.892585383  |
| H | -4.9206720941 | -3.4674252881 | 0.3285484264  |
| C | 0.6741689195  | 2.0834659475  | 0.1792829554  |
| C | 1.406828808   | 2.4690117032  | -0.9567426523 |
| C | 1.2443387114  | 2.3144167357  | 1.4437322336  |
| C | 2.6798400551  | 3.0346130745  | -0.8357638468 |
| H | 0.9809460856  | 2.3337882902  | -1.9485271476 |
| C | 2.5179399059  | 2.8809033837  | 1.5683149521  |
| H | 0.6948527242  | 2.059950858   | 2.3479526085  |
| C | 3.2405467887  | 3.239700272   | 0.4281575531  |
| H | 3.2314118733  | 3.3215036846  | -1.7286377874 |
| H | 2.9418949577  | 3.0456804242  | 2.5563207139  |
| H | 4.2265546567  | 3.6873783645  | 0.5237793449  |

53

**9B** B3LYP/BSI Optimized geometry (charge = 0, singlet)

|    |               |               |               |
|----|---------------|---------------|---------------|
| Ni | -0.4684560815 | 0.4219779551  | -0.1636639877 |
| S  | -1.4827313228 | 2.0122267175  | 0.9224722647  |
| C  | -0.6393200164 | 3.6386910948  | 0.9644981005  |
| H  | 0.2709024563  | 3.6112066705  | 1.5666107107  |
| H  | -0.3906939235 | 3.9945854009  | -0.0381456877 |
| H  | -1.3525197306 | 4.3331749038  | 1.4204269568  |
| S  | 0.9038829341  | -1.0753448406 | -1.3741095117 |
| C  | 2.3455840685  | -1.58452162   | -0.4238632549 |
| C  | 0.2499167261  | -2.7382638742 | -1.8018270273 |
| C  | 3.6140281479  | -1.2631278282 | -0.9134080001 |
| C  | 2.2104107437  | -2.2850303666 | 0.7799923892  |
| H  | 1.0029969586  | -3.261898121  | -2.3947821063 |
| H  | 0.0107308126  | -3.3256567628 | -0.9124577613 |

|   |               |               |               |
|---|---------------|---------------|---------------|
| H | -0.6517430126 | -2.6072769119 | -2.4044700625 |
| C | 4.7492466676  | -1.651465877  | -0.1989433731 |
| H | 3.7081386929  | -0.7008595489 | -1.8364269766 |
| C | 3.3488761771  | -2.6802013305 | 1.4820427443  |
| H | 1.2236890469  | -2.5133437538 | 1.1728407208  |
| C | 4.6192644612  | -2.36361585   | 0.9938802983  |
| H | 5.734727071   | -1.3952988533 | -0.5775846213 |
| H | 3.2425507895  | -3.2252476312 | 2.4159659993  |
| H | 5.5043228854  | -2.6668267807 | 1.5462620449  |
| C | -2.3257469419 | -0.4165771135 | -1.0149420888 |
| C | -2.0701166967 | -1.0353555528 | 0.1842707233  |
| C | -3.4369258005 | 0.5374915011  | -1.4138170988 |
| H | -1.8447009109 | -0.8583830271 | -1.8873554609 |
| C | -2.8313838133 | -0.9188415086 | 1.4864543765  |
| H | -1.4469116046 | -1.9283441423 | 0.1389033269  |
| C | -4.6587219666 | 0.6416960428  | -0.4762905932 |
| H | -3.7866509894 | 0.1977191452  | -2.3997250808 |
| H | -3.024384947  | 1.541682797   | -1.5621648498 |
| C | -4.0382909049 | -1.8798699547 | 1.5403371822  |
| H | -3.1415160947 | 0.1053545019  | 1.6845330275  |
| H | -2.1533875428 | -1.1835183617 | 2.3074266163  |
| C | -5.4051660909 | -0.6628872999 | -0.2938741803 |
| H | -4.3504955274 | 1.0815494927  | 0.4734556354  |
| H | -5.3442739099 | 1.3691519289  | -0.9285845739 |
| C | -5.1414839274 | -1.6877219446 | 0.5274371632  |
| H | -3.6729904506 | -2.9142708227 | 1.4440380465  |
| H | -4.4717299839 | -1.8283310617 | 2.5518528146  |
| H | -6.2706161813 | -0.7851692618 | -0.9465985775 |
| H | -5.8293491    | -2.5339863715 | 0.4807716782  |
| C | 1.1561669346  | 1.4086729533  | -0.0224801311 |
| C | 1.6803987862  | 2.0882139027  | -1.1369344425 |
| C | 1.9210244577  | 1.4230728219  | 1.1577345683  |
| C | 2.9139157064  | 2.7481195231  | -1.0796257917 |
| H | 1.1222440798  | 2.1137903387  | -2.0715299882 |
| C | 3.1562989954  | 2.0731662475  | 1.2199760318  |
| H | 1.543508236   | 0.9290490946  | 2.0501481821  |
| C | 3.6594281706  | 2.7403936252  | 0.0997798726  |
| H | 3.2887440212  | 3.2692862275  | -1.9584756685 |
| H | 3.7244577505  | 2.0647807767  | 2.1480267205  |
| H | 4.6173066944  | 3.2526507102  | 0.1487667011  |

53

**TS<sub>9B-10A</sub>** B3LYP/BSI Optimized geometry (charge = 0, singlet)

|    |               |               |               |
|----|---------------|---------------|---------------|
| Ni | 0.1818800154  | 0.2014058187  | 0.2557239317  |
| S  | -0.8324159169 | 1.1853166531  | 1.8435126947  |
| C  | -1.2480206349 | 2.9178440457  | 1.391331859   |
| H  | -0.3354138093 | 3.4724906921  | 1.1600604675  |
| H  | -1.9294055257 | 2.9738302085  | 0.5375667779  |
| H  | -1.7325992525 | 3.3774572524  | 2.2573853244  |
| S  | 1.2770180072  | -1.2483018023 | -1.0898429924 |
| C  | 2.7889814108  | -1.6912000469 | -0.213901519  |
| C  | 0.5257000062  | -2.9210941103 | -1.1928853128 |
| C  | 3.9096449864  | -2.0713077105 | -0.9586639954 |
| C  | 2.8425514412  | -1.6677053638 | 1.1832864848  |
| H  | 1.2332322462  | -3.5826150557 | -1.6974780088 |
| H  | 0.2920983248  | -3.3117996244 | -0.2003759468 |
| H  | -0.3860670197 | -2.8442275682 | -1.7875201206 |
| C  | 5.0813684021  | -2.4478414773 | -0.2996412387 |

|   |               |               |               |
|---|---------------|---------------|---------------|
| H | 3.8657982871  | -2.0658441377 | -2.0438407951 |
| C | 4.0162579465  | -2.0461758276 | 1.8351056695  |
| H | 1.9755004812  | -1.3380345756 | 1.7471160083  |
| C | 5.1345164723  | -2.4382140281 | 1.0955858585  |
| H | 5.9533501993  | -2.7411710473 | -0.877504526  |
| H | 4.0577079025  | -2.0270255686 | 2.9204985395  |
| H | 6.0486228801  | -2.7283771599 | 1.6060780445  |
| C | -2.4948370663 | -0.8363356801 | -1.0940787046 |
| C | -2.6654037399 | -1.7174652457 | -0.0941528501 |
| C | -3.0207685324 | 0.5671046046  | -1.275311647  |
| H | -1.9267742875 | -1.1878932326 | -1.9583926314 |
| C | -3.4322187132 | -1.5565921087 | 1.1980505763  |
| H | -2.2274967514 | -2.7053049318 | -0.2429966332 |
| C | -4.1512225304 | 1.0369633201  | -0.3366075315 |
| H | -3.3633289821 | 0.6550314206  | -2.3169886174 |
| H | -2.1751770485 | 1.2655122908  | -1.1837282007 |
| C | -4.9488288006 | -1.8158368857 | 1.0583226228  |
| H | -3.2389104306 | -0.5780469314 | 1.6415134362  |
| H | -3.0441666027 | -2.2868412987 | 1.919863376   |
| C | -5.4250109385 | 0.2287754281  | -0.4569258325 |
| H | -3.779887321  | 1.0636325504  | 0.6896212159  |
| H | -4.3789072855 | 2.07793611    | -0.598871838  |
| C | -5.7399817796 | -0.9381553963 | 0.1189303398  |
| H | -5.0973002561 | -2.8583964661 | 0.7385361049  |
| H | -5.4023403658 | -1.760891706  | 2.061052687   |
| H | -6.1763447853 | 0.6569647927  | -1.1215971845 |
| H | -6.727820466  | -1.3409016072 | -0.1120951207 |
| C | 1.5007717666  | 1.4827833761  | 0.0261023442  |
| C | 1.5873229549  | 2.0947141194  | -1.2359194422 |
| C | 2.4084623243  | 1.882110636   | 1.0194558561  |
| C | 2.5606858517  | 3.0636420009  | -1.5025584822 |
| H | 0.8962096824  | 1.819285353   | -2.0303752438 |
| C | 3.3857764414  | 2.844791533   | 0.7505622066  |
| H | 2.3484313838  | 1.4490138891  | 2.0128953918  |
| C | 3.4663867647  | 3.4403772395  | -0.510323075  |
| H | 2.6089668612  | 3.5204718445  | -2.4887980484 |
| H | 4.0805153537  | 3.1366095697  | 1.5353388113  |
| H | 4.2236894482  | 4.1929928457  | -0.7149220901 |

47

TS10A-12A B3LYP/BSI Optimized geometry (charge = 0, singlet)

|    |              |               |               |
|----|--------------|---------------|---------------|
| Ni | 1.0770961506 | -0.2155028389 | 0.3202220919  |
| S  | 1.8912705292 | 1.1191894745  | 1.7424789863  |
| C  | 2.5827013996 | -1.2480088717 | 0.034133169   |
| C  | 3.193827989  | -1.20752606   | -1.2309726026 |
| C  | 3.1161462936 | -2.1151440998 | 1.0003699614  |
| C  | 4.2871773437 | -2.0292186821 | -1.5295718762 |
| H  | 2.8200603259 | -0.5353138398 | -2.0018128767 |
| C  | 4.2047299149 | -2.9399744306 | 0.7002055112  |
| H  | 2.6928368959 | -2.140714231  | 2.0006641939  |
| C  | 4.7935389459 | -2.9031773874 | -0.5659780213 |
| H  | 4.7412611531 | -1.9830578775 | -2.5172584401 |
| H  | 4.6009006215 | -3.6050432182 | 1.4647074213  |
| H  | 5.6432234195 | -3.5411077104 | -0.795583105  |
| C  | 2.9849282043 | 2.2828327743  | 0.8267021092  |
| H  | 2.4456985094 | 2.8455711461  | 0.0590801204  |
| H  | 3.4056513789 | 2.9873947383  | 1.5495939367  |
| H  | 3.8042059718 | 1.7319442609  | 0.3568461097  |

|    |               |               |               |
|----|---------------|---------------|---------------|
| H  | -0.6169080514 | 1.3636388691  | -0.457399001  |
| Si | -1.4533417709 | 2.6118762123  | -0.3957910087 |
| C  | -1.9071929308 | 2.920039506   | 1.4106228243  |
| H  | -2.399171423  | 3.8921591391  | 1.5386065967  |
| H  | -2.5901836986 | 2.1487752192  | 1.7853464693  |
| C  | -0.4170379095 | 4.0340784547  | -1.0894962962 |
| H  | 0.4803529132  | 4.2005189486  | -0.4828326612 |
| H  | -0.9894490079 | 4.9700795163  | -1.1000804367 |
| C  | -2.9951390453 | 2.332153018   | -1.4585116888 |
| H  | -3.6537694452 | 3.209499517   | -1.4389833756 |
| H  | -2.7276124304 | 2.1420541644  | -2.5048042804 |
| H  | -1.0067827802 | 2.9059257336  | 2.0353234724  |
| H  | -0.0946324434 | 3.8305808033  | -2.1174975101 |
| H  | -3.5734551561 | 1.4726718685  | -1.1000504092 |
| S  | -0.2817667065 | -1.4837215364 | -0.9787224455 |
| C  | -1.8910520014 | -1.5167461286 | -0.1691384854 |
| C  | 0.1858149078  | -3.2521702357 | -0.849562877  |
| C  | -2.9985702871 | -2.0218815552 | -0.8602942191 |
| C  | -2.0398351818 | -1.0158969216 | 1.1286232718  |
| H  | 0.2274869986  | -3.5646030231 | 0.1951809872  |
| H  | -0.5398502862 | -3.8501444258 | -1.404573202  |
| H  | 1.1766353967  | -3.3451007256 | -1.2966869922 |
| C  | -4.247952812  | -2.0496809394 | -0.2391024889 |
| H  | -2.8834875411 | -2.3866637662 | -1.8769914285 |
| C  | -3.2944430236 | -1.0383804605 | 1.7406325813  |
| H  | -1.179603553  | -0.6032744263 | 1.6482645645  |
| C  | -4.3972920179 | -1.5588464938 | 1.0606462977  |
| H  | -5.1060162743 | -2.4463930036 | -0.7745444048 |
| H  | -3.4055475295 | -0.6513107275 | 2.7495531189  |
| H  | -5.3721254861 | -1.5779784375 | 1.539683768   |

47

**12A** B3LYP/BSI Optimized geometry (charge = 0, singlet)

|    |               |               |               |
|----|---------------|---------------|---------------|
| Ni | 0.5521838478  | 0.5182110904  | 0.0679941311  |
| S  | 1.604293988   | 1.9005832145  | 1.3557701512  |
| C  | 1.9880044534  | -0.6728047743 | -0.0283928434 |
| C  | 2.9149253449  | -0.6059018528 | -1.0843943937 |
| C  | 2.1340433857  | -1.7245375771 | 0.8934170058  |
| C  | 3.9305525712  | -1.5584367661 | -1.2254798047 |
| H  | 2.857091546   | 0.2052501577  | -1.8084569155 |
| C  | 3.1487222096  | -2.6786905473 | 0.7575297552  |
| H  | 1.4560530725  | -1.8018052265 | 1.7414877654  |
| C  | 4.0502900673  | -2.6026449925 | -0.3063403905 |
| H  | 4.632495313   | -1.4793352449 | -2.0533925962 |
| H  | 3.237010693   | -3.4798190538 | 1.4888177588  |
| H  | 4.8407357172  | -3.3414334152 | -0.412042365  |
| C  | 3.3863134183  | 1.5497326684  | 1.6053936593  |
| H  | 3.9371797953  | 1.5594680309  | 0.6619639448  |
| H  | 3.7715346     | 2.3442126583  | 2.2518234839  |
| H  | 3.5396882539  | 0.5843898246  | 2.0928878818  |
| H  | -0.8713598111 | 1.4971736541  | 0.2994333889  |
| Si | -1.2853646495 | 2.8079612708  | -0.3921487158 |
| C  | -1.2993841987 | 4.0863384718  | 0.983632642   |
| H  | -1.5461251837 | 5.0802262686  | 0.5898749082  |
| H  | -2.0363611559 | 3.836410951   | 1.7551556244  |
| C  | -0.1427357246 | 3.2776992098  | -1.8120259667 |
| H  | 0.8723047286  | 3.4635674241  | -1.4494072909 |
| H  | -0.5150167674 | 4.1945936328  | -2.2888245024 |

|   |               |               |               |
|---|---------------|---------------|---------------|
| C | -3.0136530602 | 2.4078172372  | -1.0395907087 |
| H | -3.4574655584 | 3.2888923212  | -1.5201895366 |
| H | -2.9803178434 | 1.6035921094  | -1.7831431872 |
| H | -0.3124010152 | 4.1336036605  | 1.4545833017  |
| H | -0.1034176634 | 2.497950508   | -2.5808004934 |
| H | -3.6858401164 | 2.0938713272  | -0.2331696069 |
| S | -0.8207952267 | -0.7502064609 | -1.2248413586 |
| C | -2.1509947578 | -1.3964580424 | -0.1947924182 |
| C | -0.0589265244 | -2.3093659288 | -1.8050841405 |
| C | -3.3248553175 | -1.8505936134 | -0.8086810156 |
| C | -2.0308798695 | -1.4199879629 | 1.1989947588  |
| H | 0.3266715324  | -2.8809998135 | -0.9601890209 |
| H | -0.8076946323 | -2.876149422  | -2.3621516272 |
| H | 0.7718980114  | -2.0346652566 | -2.4570717727 |
| C | -4.3678296364 | -2.3480391758 | -0.0268209563 |
| H | -3.4206017227 | -1.8103503298 | -1.8900748305 |
| C | -3.0829465238 | -1.9101574079 | 1.9750462563  |
| H | -1.1225061511 | -1.0556317603 | 1.6687753262  |
| C | -4.2485012019 | -2.3772030485 | 1.3649162359  |
| H | -5.2766618434 | -2.7033050786 | -0.5046288863 |
| H | -2.9878420057 | -1.9272032691 | 3.057113934   |
| H | -5.0645673885 | -2.7592336702 | 1.9719164309  |

47

TS<sub>12A-13A</sub> B3LYP/BSI Optimized geometry (charge = 0, singlet)

|    |               |               |               |
|----|---------------|---------------|---------------|
| Ni | -0.4781170189 | 0.0331363517  | -0.3222826953 |
| S  | -1.754332262  | 1.4458782594  | -1.3508358522 |
| C  | -1.8042532131 | -1.3199877219 | -0.0504998621 |
| C  | -2.2982196208 | -1.6413195012 | 1.2287893232  |
| C  | -2.3448116427 | -2.0451727555 | -1.1314208187 |
| C  | -3.2749534586 | -2.6257698816 | 1.4226927191  |
| H  | -1.9183687337 | -1.1161713686 | 2.1051066668  |
| C  | -3.3148422025 | -3.036264295  | -0.949531824  |
| H  | -2.0073936813 | -1.8307598953 | -2.1449962062 |
| C  | -3.7869081628 | -3.3304061735 | 0.3323061061  |
| H  | -3.6337403489 | -2.8424888304 | 2.4271441631  |
| H  | -3.7073077755 | -3.5755964059 | -1.8097085607 |
| H  | -4.5438697904 | -4.0972515634 | 0.4779481493  |
| C  | -3.5197152009 | 1.3062152855  | -0.8688004773 |
| H  | -3.6359383281 | 1.3174717887  | 0.2155965237  |
| H  | -4.0581839855 | 2.1498460194  | -1.3077167301 |
| H  | -3.9122184453 | 0.3644725656  | -1.255446457  |
| H  | 0.5494468915  | 1.1646693167  | -0.571326509  |
| Si | -0.3943284992 | 2.5402308601  | 0.2930798896  |
| C  | 0.660343083   | 3.7430171677  | -0.7235075474 |
| H  | 0.6530968988  | 4.7324649916  | -0.2484584065 |
| H  | 1.6979627913  | 3.3992424463  | -0.7869523162 |
| C  | -1.8590568424 | 3.5293494252  | 1.033799171   |
| H  | -2.4558931819 | 4.0338961187  | 0.2656264476  |
| H  | -1.4671890929 | 4.2959711933  | 1.7163111289  |
| C  | 0.5323960551  | 2.0602238295  | 1.9009188175  |
| H  | 0.6442698228  | 2.9623055846  | 2.5184760736  |
| H  | -0.0203171217 | 1.3295202765  | 2.5032995615  |
| H  | 0.2771562283  | 3.8600234777  | -1.742424304  |
| H  | -2.535457038  | 2.8974204012  | 1.6227999131  |
| H  | 1.5291996352  | 1.6538941768  | 1.7016935303  |
| S  | 1.055896796   | -1.2433985051 | 0.6374875457  |
| C  | 2.7493100179  | -0.7841502129 | 0.2145682938  |

|   |              |               |               |
|---|--------------|---------------|---------------|
| C | 1.0180447204 | -2.9275450343 | -0.0846490159 |
| C | 3.740570329  | -0.9693372276 | 1.1848501884  |
| C | 3.0816028149 | -0.267142748  | -1.0423924012 |
| H | 1.1920438318 | -2.889526405  | -1.1619790074 |
| H | 1.7869879411 | -3.5302920754 | 0.4033065439  |
| H | 0.0260270899 | -3.333572043  | 0.1141858482  |
| C | 5.0672296455 | -0.6451867582 | 0.8923654272  |
| H | 3.4728306599 | -1.3600220561 | 2.1622907283  |
| C | 4.4095216688 | 0.0516391689  | -1.3284979509 |
| H | 2.3038309435 | -0.1012097715 | -1.7807880013 |
| C | 5.4024575386 | -0.1370121039 | -0.3635981585 |
| H | 5.8349303037 | -0.7860674443 | 1.64812461    |
| H | 4.6666733918 | 0.4534416744  | -2.3046345741 |
| H | 6.4343845485 | 0.1173253979  | -0.5892786939 |

47

**13A** B3LYP/BSI Optimized geometry (charge = 0, singlet)

|    |               |               |               |
|----|---------------|---------------|---------------|
| Ni | -0.9910075077 | -0.0596093771 | -0.2960727691 |
| S  | -1.8656997202 | -1.9559434485 | 0.30536721    |
| C  | 0.1199317807  | 1.8219197639  | -0.6402242193 |
| C  | 0.6433782312  | 2.2675353507  | 0.5807612607  |
| C  | 0.7884118354  | 2.1230042304  | -1.8352677162 |
| C  | 1.8639058565  | 2.9441678353  | 0.6105988705  |
| H  | 0.1003414742  | 2.0889433765  | 1.5033995567  |
| C  | 1.9985690134  | 2.8144342728  | -1.8041449861 |
| H  | 0.3625304826  | 1.812962473   | -2.7848669951 |
| C  | 2.539606251   | 3.2195843853  | -0.5799934297 |
| H  | 2.2795918206  | 3.2684212008  | 1.5603825498  |
| H  | 2.5153547333  | 3.0448531333  | -2.7318029039 |
| H  | 3.4809400553  | 3.7623096377  | -0.5563500922 |
| C  | -2.6872733007 | -2.5733115455 | -1.22015833   |
| H  | -3.0516368175 | -3.5835244481 | -1.0104609732 |
| H  | -3.5422786669 | -1.9468688246 | -1.4875377729 |
| H  | -2.0059468828 | -2.621027137  | -2.0753269939 |
| H  | -0.971072799  | 1.5462025844  | -0.7103659221 |
| Si | -2.8475205101 | 0.7369554391  | 0.7460531378  |
| C  | -2.9378305531 | 2.6500963942  | 0.5312038413  |
| H  | -3.0571323692 | 2.9424295428  | -0.5199410251 |
| H  | -3.8168533467 | 3.0238672196  | 1.0745782216  |
| C  | -4.5490763071 | 0.1738532522  | 0.0996122116  |
| H  | -4.7505341439 | -0.8775199414 | 0.323113916   |
| H  | -5.3331110903 | 0.781049242   | 0.571963048   |
| C  | -2.7516274921 | 0.474437706   | 2.6317300438  |
| H  | -3.6073218825 | 0.9602442625  | 3.1203700898  |
| H  | -2.7634875245 | -0.5875496884 | 2.8941862959  |
| H  | -2.0626471689 | 3.1807855875  | 0.92197633    |
| H  | -1.8409427197 | 0.918637425   | 3.0535344781  |
| H  | -4.638336488  | 0.3195402828  | -0.9842623021 |
| S  | 1.0516630907  | -1.1056985896 | -1.4519935581 |
| C  | 2.2282322616  | -1.1136140274 | -0.090714208  |
| C  | 0.8399502596  | -2.9017307747 | -1.7148741173 |
| C  | 1.921986356   | -1.7364031735 | 1.1269705028  |
| C  | 3.4605623081  | -0.4746045928 | -0.2629999643 |
| H  | 1.8213926806  | -3.3789188347 | -1.7503036324 |
| H  | 0.220428506   | -3.3272718042 | -0.9208097986 |
| H  | 0.3410817944  | -3.0273437825 | -2.6793866918 |
| C  | 2.8596255726  | -1.7267671654 | 2.1606513315  |
| H  | 0.9596188884  | -2.2215322135 | 1.2613467627  |

|   |              |               |               |
|---|--------------|---------------|---------------|
| C | 4.3863868842 | -0.457471781  | 0.7823526646  |
| H | 3.6887849492 | 0.0054733736  | -1.2091073471 |
| C | 4.0900326831 | -1.0863234943 | 1.9927207775  |
| H | 2.6227356678 | -2.2148434925 | 3.1022463741  |
| H | 5.3429541297 | 0.039678805   | 0.6448556886  |
| H | 4.8148957247 | -1.0788876394 | 2.8022795849  |

29

**14** B3LYP/BSI Optimized geometry (charge = 0, singlet)

|    |               |               |               |
|----|---------------|---------------|---------------|
| Ni | -0.0690153614 | 0.3703093992  | 0.0843531533  |
| C  | 0.6124493667  | 2.1252122588  | 0.037360301   |
| C  | 1.4484277424  | 2.6135088062  | 1.063997956   |
| C  | 0.5932116889  | 2.8636510223  | -1.165098092  |
| C  | 2.2520715805  | 3.7440537229  | 0.8893045782  |
| H  | 1.4784300682  | 2.1014995925  | 2.0262015581  |
| C  | 1.3934532241  | 3.994134211   | -1.3536267456 |
| H  | -0.0601049128 | 2.5528849099  | -1.9817525719 |
| C  | 2.2268597934  | 4.4369249055  | -0.3234845082 |
| H  | 2.8932630997  | 4.0887423556  | 1.6981680351  |
| H  | 1.3645178731  | 4.5333293445  | -2.2984776341 |
| H  | 2.844958167   | 5.3208653634  | -0.4616510663 |
| H  | -0.3141899946 | -1.1367251223 | -0.008414085  |
| S  | -1.9057495133 | 0.687985354   | 1.0175081105  |
| C  | -3.2417521082 | -0.2727957777 | 0.2679582522  |
| C  | -2.5656490385 | 2.3749858279  | 0.7161454908  |
| C  | -4.4791253001 | -0.3096563807 | 0.921089747   |
| C  | -3.0466073557 | -0.9785562453 | -0.9202621488 |
| H  | -2.6635725361 | 2.5692836093  | -0.3531899804 |
| H  | -3.5357632331 | 2.4660456353  | 1.2102007198  |
| H  | -1.8473878139 | 3.0720494379  | 1.1492050082  |
| C  | -5.5309432905 | -1.0377952912 | 0.3638711147  |
| H  | -4.6194554933 | 0.2180162371  | 1.8605503063  |
| C  | -4.1024439655 | -1.7089900062 | -1.4678328981 |
| H  | -2.063456899  | -0.9714030917 | -1.3764130794 |
| C  | -5.3447419264 | -1.7362569712 | -0.8315342487 |
| H  | -6.491507926  | -1.0676597508 | 0.8707424534  |
| H  | -3.9498289819 | -2.2594148342 | -2.3920283778 |
| H  | -6.1639419537 | -2.3067865224 | -1.2602613484 |

31

**15** B3LYP/BSI Optimized geometry (charge = 0, singlet)

|    |               |               |               |
|----|---------------|---------------|---------------|
| Ni | -1.3265740399 | 0.1158640588  | -0.6516982943 |
| C  | -1.3065017707 | 1.8979345666  | -0.0500613464 |
| C  | -0.2418777716 | 2.4185311487  | 0.7159417715  |
| C  | -2.2011746969 | 2.8389223514  | -0.6031489719 |
| C  | -0.0553628597 | 3.7931317057  | 0.8890489004  |
| H  | 0.4643696996  | 1.7368552068  | 1.1909455818  |
| C  | -2.0254254707 | 4.2163845688  | -0.4402308495 |
| H  | -3.0613088145 | 2.4944412027  | -1.1796126959 |
| C  | -0.9487108787 | 4.6971469818  | 0.3086357316  |
| H  | 0.7821726161  | 4.1609844472  | 1.4787231552  |
| H  | -2.7285041966 | 4.9147035844  | -0.8904268608 |
| H  | -0.8115474369 | 5.7671985349  | 0.4457441916  |
| H  | -1.1880624817 | -1.2249148317 | -1.403836107  |
| S  | -2.3068125693 | -0.863382069  | 0.9350851521  |
| C  | -3.2553745852 | 0.2716481648  | 2.0345763778  |
| H  | -3.9988433546 | 0.84634915    | 1.4792857164  |



|    |               |               |               |
|----|---------------|---------------|---------------|
| H  | -3.7324105306 | -0.3161376335 | 2.8223561168  |
| H  | -2.5312257472 | 0.9632408051  | 2.4659244333  |
| Si | -3.9021827247 | -2.0516122242 | -0.0569396915 |
| C  | -3.0628342236 | -3.6029418847 | -0.6984346337 |
| H  | -3.7855656106 | -4.2171697032 | -1.250936664  |
| H  | -2.2409267868 | -3.3410894932 | -1.3705044912 |
| H  | -2.6615003967 | -4.2101630903 | 0.1204448259  |
| C  | -4.7057351855 | -1.0502124943 | -1.435866967  |
| H  | -5.5429045765 | -1.6132180969 | -1.8690569566 |
| H  | -5.1009395685 | -0.0938481037 | -1.0747789171 |
| H  | -3.9836317201 | -0.8458291564 | -2.2325595962 |
| C  | -5.1629961722 | -2.4705126061 | 1.2880993679  |
| H  | -5.9214644696 | -3.1459061115 | 0.871641466   |
| H  | -4.6942599925 | -2.9840875787 | 2.1351509496  |
| H  | -5.6857576836 | -1.5864984004 | 1.6688323053  |

47

**TS<sub>10A-12B</sub>** B3LYP/BSI Optimized geometry (charge = 0, singlet)

|    |               |               |               |
|----|---------------|---------------|---------------|
| Ni | 0.4382978087  | -0.6204954096 | -0.3952820133 |
| S  | 0.2113835084  | -2.7296990051 | -0.351745739  |
| C  | 2.1811245866  | -0.6033099255 | 0.2293386791  |
| C  | 1.6539478549  | -3.6809293226 | 0.2606198372  |
| C  | 3.2913319234  | -0.6197814052 | -0.6366760172 |
| C  | 2.4292558132  | -0.3698250429 | 1.5957215478  |
| H  | 1.3538533412  | -4.7336922302 | 0.2413766477  |
| H  | 2.5253813387  | -3.5442072333 | -0.3827611059 |
| H  | 1.9157420709  | -3.3999888037 | 1.2825600688  |
| C  | 4.5869279029  | -0.372048528  | -0.1678400046 |
| H  | 3.1488586445  | -0.8342015428 | -1.694377433  |
| C  | 3.7203437405  | -0.1213676826 | 2.0710532237  |
| H  | 1.6054599348  | -0.386087305  | 2.3070191871  |
| C  | 4.8018204285  | -0.1203455335 | 1.1891017333  |
| H  | 5.4267410303  | -0.3829498552 | -0.8595495613 |
| H  | 3.8825384993  | 0.0638068573  | 3.1308957027  |
| H  | 5.8083471484  | 0.0639112052  | 1.5565831568  |
| Si | 0.6202370704  | 3.1613417076  | -0.1460253458 |
| H  | -0.1756475428 | 2.1733520434  | 0.649537653   |
| C  | 2.2212042629  | 3.5453143194  | 0.7785063878  |
| C  | 0.9767091592  | 2.3837135674  | -1.8371467507 |
| C  | -0.4222948351 | 4.7303499832  | -0.3406863172 |
| H  | 2.7985650728  | 4.3133721278  | 0.2481309838  |
| H  | 2.0191958316  | 3.9238001937  | 1.787675965   |
| H  | 2.8513372684  | 2.6539491745  | 0.8729273492  |
| H  | 1.7909263334  | 2.9010418103  | -2.3579537518 |
| H  | 0.0902662764  | 2.4016528461  | -2.4818644334 |
| H  | 1.2802161991  | 1.3343454056  | -1.7216155237 |
| H  | -0.6493014033 | 5.1783394462  | 0.6340516892  |
| H  | 0.1080114067  | 5.4840026476  | -0.9360789081 |
| H  | -1.3747705191 | 4.52165755    | -0.8420402675 |
| S  | -1.624464781  | -0.0505140008 | -1.2026044886 |
| C  | -2.9133827602 | -0.1868908627 | 0.0486523042  |
| C  | -2.181914035  | -1.2695353108 | -2.4497967632 |
| C  | -3.8553789385 | 0.8441471393  | 0.1370632576  |
| C  | -2.9684447457 | -1.2795833359 | 0.9215192871  |
| H  | -2.1207976655 | -2.2805296037 | -2.0420543411 |
| H  | -3.2001567349 | -1.023140191  | -2.7577569679 |
| H  | -1.5034665149 | -1.183139868  | -3.3017811886 |
| C  | -4.8646309133 | 0.7768007668  | 1.0992347466  |

|   |               |               |               |
|---|---------------|---------------|---------------|
| H | -3.7948210503 | 1.6900651464  | -0.5411249607 |
| C | -3.9860026154 | -1.339911272  | 1.875117424   |
| H | -2.2208616045 | -2.0660113176 | 0.8555534524  |
| C | -4.9317009299 | -0.3155537586 | 1.9661717001  |
| H | -5.5956849892 | 1.5774164323  | 1.1701228801  |
| H | -4.0334014674 | -2.1875116667 | 2.5532556722  |
| H | -5.7176634101 | -0.3667003572 | 2.7147573461  |

47

**12B** B3LYP/BSI Optimized geometry (charge = 0, singlet)

|    |               |               |               |
|----|---------------|---------------|---------------|
| Ni | 0.3175914528  | -0.0539832893 | -0.5123700995 |
| S  | -0.1866405723 | -1.4497199907 | -2.08298321   |
| C  | 1.9999443489  | -0.8334347775 | -0.2222778091 |
| C  | 0.9962731549  | -2.8267858856 | -2.3394819021 |
| C  | 3.1189316225  | -0.5363605232 | -1.0204196929 |
| C  | 2.2052396151  | -1.6774545097 | 0.8844628315  |
| H  | 0.5336278148  | -3.4960496833 | -3.0716736253 |
| H  | 1.9503352149  | -2.4701596437 | -2.7328410456 |
| H  | 1.1788718252  | -3.3770947664 | -1.41407862   |
| C  | 4.3908627543  | -1.0335940904 | -0.7133864444 |
| H  | 3.0002718272  | 0.0795370504  | -1.9101456655 |
| C  | 3.471362443   | -2.185565104  | 1.1918071411  |
| H  | 1.3669946739  | -1.9472141071 | 1.5248196831  |
| C  | 4.5730868099  | -1.8603683542 | 0.3969183189  |
| H  | 5.2373269481  | -0.7816564608 | -1.3492760316 |
| H  | 3.5975202754  | -2.8353714105 | 2.0556239111  |
| H  | 5.5585670661  | -2.2528845063 | 0.6351272975  |
| Si | 1.2543230585  | 2.1287452892  | 0.9900389335  |
| H  | 0.4751864102  | 0.7946943259  | 0.8949038572  |
| C  | 2.768219471   | 1.7548847645  | 2.0382197432  |
| C  | 1.7113159232  | 2.9395717899  | -0.6501574389 |
| C  | 0.0069625732  | 3.2185795297  | 1.8982918703  |
| H  | 3.2909670309  | 2.6863794681  | 2.2907708113  |
| H  | 2.4917194265  | 1.2615307646  | 2.9765863471  |
| H  | 3.4638800973  | 1.100317254   | 1.5055754309  |
| H  | 2.1878039778  | 3.9065755113  | -0.4373233806 |
| H  | 0.8313868142  | 3.1370398391  | -1.2714920036 |
| H  | 2.4195002459  | 2.3372910783  | -1.2254163211 |
| H  | -0.3059100445 | 2.7729907851  | 2.8493943836  |
| H  | 0.4416071962  | 4.2020412423  | 2.1175285121  |
| H  | -0.8880977656 | 3.3763734094  | 1.2865452117  |
| S  | -1.7448149005 | 1.0739997299  | -0.7010647157 |
| C  | -2.8907975322 | 0.2568812337  | 0.4237579671  |
| C  | -2.567239676  | 0.8119917807  | -2.3145934552 |
| C  | -3.6889490968 | 1.049014548   | 1.2563908537  |
| C  | -2.9739344296 | -1.1399455397 | 0.4754299759  |
| H  | -2.5700005637 | -0.248129502  | -2.5724549351 |
| H  | -3.579734287  | 1.2167349618  | -2.2575625442 |
| H  | -1.985025511  | 1.3603003109  | -3.0586240205 |
| C  | -4.5792257052 | 0.4399303981  | 2.1430880492  |
| H  | -3.6126776489 | 2.131211561   | 1.2080043183  |
| C  | -3.8738863178 | -1.7379055145 | 1.3589512632  |
| H  | -2.3397292332 | -1.7413505614 | -0.1714518683 |
| C  | -4.6735155558 | -0.9521649585 | 2.193047897   |
| H  | -5.1988082551 | 1.0537785685  | 2.7910860554  |
| H  | -3.9441011641 | -2.8214449382 | 1.3992766802  |
| H  | -5.3678188124 | -1.4245090773 | 2.8826984852  |

47

**TS<sub>12B-16A</sub>** B3LYP/BSI Optimized geometry (charge = 0, singlet)

|    |               |               |               |
|----|---------------|---------------|---------------|
| Ni | 0.2215632032  | 0.0659202171  | -0.4091422622 |
| S  | -0.3997279528 | -1.5397505533 | -1.8221080282 |
| C  | 1.9409999633  | -0.8066665488 | 0.0056773264  |
| C  | 0.878142201   | -2.806989107  | -2.1634556058 |
| C  | 3.0736914993  | -0.5856995443 | -0.7976330866 |
| C  | 2.0005522165  | -1.8277331721 | 0.9711903974  |
| H  | 0.4370885166  | -3.5174427418 | -2.8688840871 |
| H  | 1.7699999662  | -2.3675763627 | -2.6173887642 |
| H  | 1.1723559964  | -3.3436519324 | -1.2583371873 |
| C  | 4.2035114787  | -1.397579757  | -0.6832003445 |
| H  | 3.0673251772  | 0.2185363697  | -1.5297243576 |
| C  | 3.1311827952  | -2.6371572533 | 1.0881368962  |
| H  | 1.1516366494  | -1.9997136897 | 1.6282846201  |
| C  | 4.2358785476  | -2.4286614064 | 0.2582614111  |
| H  | 5.0612313286  | -1.2215635364 | -1.3279003913 |
| H  | 3.1509452792  | -3.4309556288 | 1.8310388283  |
| H  | 5.1180416774  | -3.0561904161 | 0.3528541004  |
| Si | 0.8721595886  | 2.115093514   | 0.7609325824  |
| H  | 1.3834200258  | 0.3625579635  | 0.4968940612  |
| C  | 2.6321047874  | 2.2901084453  | 1.4634197667  |
| C  | 0.7555839775  | 3.4129968852  | -0.6240844961 |
| C  | -0.3222209825 | 2.479887641   | 2.1906162869  |
| H  | 2.7946126562  | 3.3159150466  | 1.819489299   |
| H  | 2.812157996   | 1.6119150442  | 2.3055335167  |
| H  | 3.393014634   | 2.0765679931  | 0.7041766558  |
| H  | 1.0017084356  | 4.4012245452  | -0.212051109  |
| H  | -0.238129576  | 3.4746719689  | -1.0774801025 |
| H  | 1.4827998923  | 3.1988561623  | -1.4161661481 |
| H  | -0.176813087  | 1.760197021   | 3.0047672639  |
| H  | -0.1136157682 | 3.4799591682  | 2.5936688076  |
| H  | -1.3750816918 | 2.4495715151  | 1.8970939321  |
| S  | -1.8338328105 | 1.0855864918  | -0.6115451771 |
| C  | -3.0267634678 | 0.2392768693  | 0.4471962507  |
| C  | -2.5676765586 | 0.8326501067  | -2.2719606919 |
| C  | -3.9266989028 | 1.0338521237  | 1.1679808756  |
| C  | -3.0648905007 | -1.1554522338 | 0.5522708759  |
| H  | -2.5327427522 | -0.2205033915 | -2.5518503764 |
| H  | -3.5891770812 | 1.2185813755  | -2.2480338899 |
| H  | -1.963259102  | 1.4133033328  | -2.9724617908 |
| C  | -4.8708413641 | 0.4287477836  | 1.9993768683  |
| H  | -3.8877801279 | 2.1153018176  | 1.0756675064  |
| C  | -4.0176821563 | -1.7492080118 | 1.382439845   |
| H  | -2.3639441623 | -1.7586158009 | -0.0206681345 |
| C  | -4.9164683416 | -0.9625837337 | 2.1069365198  |
| H  | -5.5684287486 | 1.044766035   | 2.5600660107  |
| H  | -4.0535107484 | -2.8321966888 | 1.4635477233  |
| H  | -5.6514451058 | -1.4329003961 | 2.7546143932  |

47

**16A** B3LYP/BSI Optimized geometry (charge = 0, singlet)

|    |               |               |               |
|----|---------------|---------------|---------------|
| Ni | 0.4251906017  | 0.2105717858  | -0.3983017166 |
| S  | -0.1503917622 | -1.3902383833 | -1.8947033092 |
| C  | 2.2814405165  | -0.7955392127 | 0.1024775097  |
| C  | 1.0526378465  | -2.7402002562 | -2.1876053801 |
| C  | 3.3704551191  | -0.6393988774 | -0.7658205353 |

|    |               |               |               |
|----|---------------|---------------|---------------|
| C  | 2.2253759879  | -1.9086165879 | 0.9534490586  |
| H  | 0.6193739832  | -3.3929987172 | -2.9511704505 |
| H  | 2.0078618043  | -2.3588834489 | -2.5574849017 |
| H  | 1.2349650762  | -3.3315732895 | -1.2869331775 |
| C  | 4.3576767938  | -1.6225948847 | -0.8322029477 |
| H  | 3.4394826761  | 0.2450819331  | -1.3924598945 |
| C  | 3.2152565898  | -2.8879928587 | 0.8874276289  |
| H  | 1.407159724   | -2.0084420937 | 1.660917107   |
| C  | 4.2806586741  | -2.7475621615 | -0.0069917241 |
| H  | 5.1921494654  | -1.5067880866 | -1.5184990524 |
| H  | 3.1631976573  | -3.7557796596 | 1.5394528266  |
| H  | 5.056138135   | -3.5075243391 | -0.0512975817 |
| Si | 0.9697123231  | 2.2147682446  | 0.7229066839  |
| H  | 1.7643819969  | 0.1634780713  | 0.4732859099  |
| C  | 2.7620635946  | 2.3179139715  | 1.3822674997  |
| C  | 0.846525061   | 3.6253688871  | -0.5575305538 |
| C  | -0.1414327624 | 2.6035891069  | 2.2232749698  |
| H  | 2.9475528941  | 3.3195012876  | 1.7929871809  |
| H  | 2.9587381165  | 1.5918319277  | 2.1800973286  |
| H  | 3.5046041738  | 2.1459180426  | 0.5938740403  |
| H  | 1.0950200881  | 4.583282599   | -0.0803077281 |
| H  | -0.1526850247 | 3.7198542592  | -0.9955379345 |
| H  | 1.5615183881  | 3.471154121   | -1.3749758461 |
| H  | 0.0053746999  | 1.8625367961  | 3.0182496053  |
| H  | 0.1219162917  | 3.5869091773  | 2.6359452074  |
| H  | -1.2070718126 | 2.6209367948  | 1.9752956815  |
| S  | -1.5946342362 | 1.1693998727  | -0.5801086421 |
| C  | -2.7660262685 | 0.2582291096  | 0.4514891509  |
| C  | -2.3260516389 | 0.9481476833  | -2.2479935841 |
| C  | -3.6478378096 | 1.013529696   | 1.2336355541  |
| C  | -2.8110988323 | -1.1398061833 | 0.4717856853  |
| H  | -2.2666296677 | -0.0935474267 | -2.5633313175 |
| H  | -3.3565263035 | 1.3075818507  | -2.201863127  |
| H  | -1.741065618  | 1.5697611371  | -2.9294495041 |
| C  | -4.5813783543 | 0.3643879066  | 2.0435936277  |
| H  | -3.6041003925 | 2.0982000015  | 1.205241257   |
| C  | -3.7540434818 | -1.7769681227 | 1.2804966742  |
| H  | -2.122414934  | -1.708472774  | -0.1499879451 |
| C  | -4.6346245949 | -1.0305220326 | 2.067469486   |
| H  | -5.2649567937 | 0.9493561281  | 2.6526742919  |
| H  | -3.7967576846 | -2.8626959925 | 1.2959319821  |
| H  | -5.3615583062 | -1.5350180023 | 2.6983359065  |

47

**TS<sub>10A-12C</sub>** B3LYP/BSI Optimized geometry (charge = 0, singlet)

|    |               |               |               |
|----|---------------|---------------|---------------|
| Ni | -0.3778081368 | -0.8699205013 | -1.113890295  |
| S  | -1.6576244461 | -2.5781500738 | -1.4812776327 |
| C  | 0.0194912661  | 0.943504035   | -0.8110022659 |
| C  | -1.8454790208 | -3.4710544505 | 0.1151336674  |
| C  | -0.056875676  | 1.8843143573  | -1.8547149491 |
| C  | 0.2677788175  | 1.4370353409  | 0.4829813376  |
| H  | -2.5292468163 | -4.3109849556 | -0.0338914532 |
| H  | -0.8796975666 | -3.8668189751 | 0.4472497223  |
| H  | -2.2496886933 | -2.8201258956 | 0.8957546719  |
| C  | 0.0846943604  | 3.2563243985  | -1.6155392858 |
| H  | -0.2338554253 | 1.5526678086  | -2.8773887744 |
| C  | 0.4116937939  | 2.8065861114  | 0.7303337176  |
| H  | 0.3388958078  | 0.7478207715  | 1.3240900724  |

|    |               |               |               |
|----|---------------|---------------|---------------|
| C  | 0.3196150352  | 3.7224054913  | -0.3205231147 |
| H  | 0.0128262625  | 3.9599723701  | -2.4422795794 |
| H  | 0.5952980876  | 3.1580412228  | 1.7437140495  |
| H  | 0.4340229484  | 4.7869414101  | -0.1323957894 |
| Si | -3.5555351482 | 0.3485139576  | 0.8157150258  |
| H  | -2.2327649434 | -0.3514058518 | 0.7748530304  |
| C  | -3.4780693276 | 1.6665090527  | 2.1744440519  |
| C  | -3.8865451737 | 1.1403056264  | -0.8671994365 |
| C  | -4.8880553317 | -0.9353581085 | 1.2193914779  |
| H  | -4.4214760994 | 2.2224990868  | 2.2440743424  |
| H  | -3.2850323814 | 1.2174802085  | 3.1564000356  |
| H  | -2.6778292845 | 2.3877477804  | 1.9722133701  |
| H  | -4.8470060672 | 1.670971597   | -0.8708676729 |
| H  | -3.9196638103 | 0.378092209   | -1.6541100381 |
| H  | -3.1013179546 | 1.8589778939  | -1.1270256848 |
| H  | -4.7128539899 | -1.4053476302 | 2.1947287891  |
| H  | -5.8842752371 | -0.4761935071 | 1.2474966178  |
| H  | -4.9083020069 | -1.7285438293 | 0.4631410726  |
| C  | 2.3272720831  | -2.7648250279 | 0.730925415   |
| C  | 2.0845493078  | -2.8452511499 | -0.644771985  |
| C  | 2.7018226409  | -3.9119009511 | 1.4319806677  |
| C  | 2.1889647338  | -4.0694345993 | -1.3122652485 |
| C  | 2.8152339354  | -5.1359911744 | 0.7683468911  |
| H  | 2.8954130947  | -3.8489795565 | 2.4991478155  |
| C  | 2.5533721583  | -5.2136359415 | -0.6008666382 |
| H  | 1.9816522023  | -4.123270878  | -2.3763299211 |
| H  | 3.1021630257  | -6.0274490446 | 1.3188019177  |
| H  | 2.6347913318  | -6.1643340107 | -1.1199111837 |
| H  | 2.2249669191  | -1.8189819805 | 1.2544309757  |
| S  | 1.6042874044  | -1.4084236302 | -1.6211191212 |
| C  | 2.9172943172  | -0.2229746965 | -1.1567567215 |
| H  | 2.7488356089  | 0.6750324544  | -1.7527266025 |
| H  | 2.8717945436  | 0.0435942911  | -0.1004545038 |
| H  | 3.8804525207  | -0.6744045753 | -1.4057373072 |

47

**12C** B3LYP/BSI Optimized geometry (charge = 0, singlet)

|    |               |               |               |
|----|---------------|---------------|---------------|
| Ni | -0.231677257  | 0.6899070651  | 0.1784927414  |
| S  | -2.3683554786 | 1.4307340277  | 0.2716059276  |
| C  | 1.4969377625  | -0.1379032637 | 0.2816628923  |
| C  | -2.8337811879 | 1.3757045095  | 2.050487985   |
| C  | 2.5057734239  | -0.1059993367 | -0.6973770346 |
| C  | 1.7534172209  | -0.916618247  | 1.4268664517  |
| H  | -3.8658616039 | 1.7283232759  | 2.135600318   |
| H  | -2.7860775785 | 0.3578815034  | 2.4494711912  |
| H  | -2.1990813385 | 2.0218555274  | 2.6643681583  |
| C  | 3.7110931775  | -0.8006164408 | -0.5420842528 |
| H  | 2.3586450116  | 0.4671970808  | -1.6113452461 |
| C  | 2.9453444826  | -1.6289785823 | 1.5852612361  |
| H  | 1.0139747127  | -0.9703536748 | 2.2252920201  |
| C  | 3.934252565   | -1.5696057386 | 0.6008163684  |
| H  | 4.471619684   | -0.7444036918 | -1.3183473494 |
| H  | 3.1054838113  | -2.2240815796 | 2.4819790899  |
| H  | 4.8670655884  | -2.1143010469 | 0.7241798566  |
| Si | 0.7876010289  | 2.7498943447  | 1.1372078038  |
| H  | 0.0487867448  | 1.3808264017  | 1.5281310618  |
| C  | 2.4519823418  | 2.5813403163  | 2.0057233082  |
| C  | 1.0110237752  | 3.3678595184  | -0.6373245052 |

|   |               |               |               |
|---|---------------|---------------|---------------|
| C | -0.3083449238 | 3.9815170865  | 2.0543440723  |
| H | 2.9109791474  | 3.5734088339  | 2.1093092597  |
| H | 2.3411287233  | 2.1604871365  | 3.0113932876  |
| H | 3.1360781295  | 1.9384219938  | 1.445877579   |
| H | 1.4811268634  | 4.3605787489  | -0.586779362  |
| H | 0.0494419842  | 3.4797088346  | -1.1470681937 |
| H | 1.6604065247  | 2.722134564   | -1.234356431  |
| H | -0.4490764209 | 3.7168647605  | 3.1080938186  |
| H | 0.1588828007  | 4.9746041791  | 2.0237279615  |
| H | -1.2903534423 | 4.0485480584  | 1.5764830708  |
| C | -2.1143348107 | -2.3390615222 | -0.500543837  |
| C | -0.9488496213 | -2.1008572598 | -1.2378480124 |
| C | -2.4324546125 | -3.6472221779 | -0.1334273726 |
| C | -0.0966803587 | -3.1515375274 | -1.5882236812 |
| C | -1.587693415  | -4.7042594347 | -0.482735214  |
| H | -3.3385111708 | -3.8383962071 | 0.4351454421  |
| C | -0.4191954411 | -4.4547494937 | -1.2041652782 |
| H | 0.8106477731  | -2.9484910288 | -2.1481030443 |
| H | -1.8387058734 | -5.7199532747 | -0.189409069  |
| H | 0.2429768705  | -5.27304435   | -1.472916136  |
| H | -2.7511795181 | -1.5072715668 | -0.2115986275 |
| S | -0.4946739894 | -0.4353955472 | -1.7556068649 |
| C | -1.9893311876 | 0.0568187329  | -2.6887674811 |
| H | -1.7711379875 | 1.0282354395  | -3.1399149257 |
| H | -2.1604534999 | -0.6844881668 | -3.4725217233 |
| H | -2.8512854304 | 0.1524752202  | -2.0270152599 |

47

**TS<sub>12c-16b</sub>** B3LYP/BSI Optimized geometry (charge = 0, singlet)

|    |               |               |               |
|----|---------------|---------------|---------------|
| Ni | 1.0831076813  | 0.691616861   | -0.1177294123 |
| S  | -0.6713918501 | 2.0956123936  | -0.3218929712 |
| C  | 2.6269395366  | -0.4751769761 | 0.1187816954  |
| C  | -1.9031458356 | 1.2868138561  | 0.7766954989  |
| C  | 3.630609909   | -0.5383931866 | -0.863934755  |
| C  | 2.6843373473  | -1.3995382307 | 1.175887958   |
| H  | -2.849929102  | 1.8260601363  | 0.6767052249  |
| H  | -2.0783858717 | 0.2377614639  | 0.5117714034  |
| H  | -1.5959834383 | 1.3297466655  | 1.8265827656  |
| C  | 4.6196045202  | -1.5245746836 | -0.8237640955 |
| H  | 3.636927026   | 0.1834120356  | -1.6781892905 |
| C  | 3.6707006375  | -2.3873432222 | 1.219727213   |
| H  | 1.9455762398  | -1.3566808376 | 1.9739070336  |
| C  | 4.6407479296  | -2.4551501627 | 0.2174488811  |
| H  | 5.3776057253  | -1.5618297632 | -1.6029167989 |
| H  | 3.6852047779  | -3.1008338185 | 2.0402738598  |
| H  | 5.413909275   | -3.2182771634 | 0.2543705629  |
| Si | 1.938344554   | 2.5841173145  | 1.1704292203  |
| H  | 2.3210105238  | 0.9504393819  | 0.6379669513  |
| C  | 3.6992558499  | 2.3942421544  | 1.8989741132  |
| C  | 2.0872014295  | 4.0227502513  | -0.0490367019 |
| C  | 0.8368116458  | 2.8768108057  | 2.6806022409  |
| H  | 3.9875043046  | 3.3197885998  | 2.4155859417  |
| H  | 3.7621525307  | 1.5749904121  | 2.6250653795  |
| H  | 4.4476674247  | 2.2001629227  | 1.1215998281  |
| H  | 2.4803605345  | 4.8986255644  | 0.4845599549  |
| H  | 1.1339182487  | 4.2903264535  | -0.5091033133 |
| H  | 2.8052563775  | 3.7758347791  | -0.8403965168 |
| H  | 0.7654365549  | 1.971543623   | 3.2956572299  |

|   |               |               |               |
|---|---------------|---------------|---------------|
| H | 1.2938646319  | 3.6560001693  | 3.3050081699  |
| H | -0.170168061  | 3.1942948843  | 2.4030358634  |
| C | -0.4906542759 | -2.9984371728 | -0.0703788065 |
| C | 0.3124378699  | -2.5479554815 | -1.1252878617 |
| C | -0.4460734082 | -4.3385026206 | 0.3128257711  |
| C | 1.1728500591  | -3.435076711  | -1.7783290975 |
| C | 0.4117615734  | -5.2275023184 | -0.3406810273 |
| H | -1.0741461826 | -4.6859389729 | 1.1286964114  |
| C | 1.2229972215  | -4.7730852653 | -1.3808376001 |
| H | 1.8013582741  | -3.0767220033 | -2.5869958936 |
| H | 0.4486180022  | -6.2699035385 | -0.0364492528 |
| H | 1.8946444342  | -5.4592250053 | -1.8893062682 |
| H | -1.1449719783 | -2.3049156629 | 0.4506823552  |
| S | 0.2815626374  | -0.8290158927 | -1.6535960772 |
| C | -1.4559877452 | -0.671092676  | -2.2005898541 |
| H | -1.6318171784 | 0.3962820099  | -2.3472175099 |
| H | -1.5794138602 | -1.2217186919 | -3.1356373268 |
| H | -2.1467680103 | -1.0528678395 | -1.4470097065 |

47

**16B** B3LYP/BSI Optimized geometry (charge = 0, singlet)

|    |               |               |               |
|----|---------------|---------------|---------------|
| Ni | -0.0041070591 | 1.2213246454  | -0.0219920532 |
| S  | -1.8884667593 | 2.2982497367  | -0.1259065996 |
| C  | 1.7640478185  | -0.0346571318 | 0.271550128   |
| C  | -2.9515622539 | 1.2333451534  | 0.9309693061  |
| C  | 2.3894480636  | -0.7681730775 | -0.746544818  |
| C  | 1.6865571739  | -0.5668591062 | 1.5663105893  |
| H  | -3.9718880507 | 1.6248952475  | 0.8752779306  |
| H  | -2.9616096015 | 0.1898796074  | 0.5962345527  |
| H  | -2.6300719688 | 1.2638627657  | 1.9765629391  |
| C  | 2.8699262631  | -2.0509773387 | -0.487999523  |
| H  | 2.4908546609  | -0.3359501024 | -1.7375706673 |
| C  | 2.1535858675  | -1.858099342  | 1.8172032034  |
| H  | 1.2700966099  | 0.0265868555  | 2.3743369158  |
| C  | 2.7438429134  | -2.5996314232 | 0.7913554396  |
| H  | 3.3461345025  | -2.6217210384 | -1.2802431594 |
| H  | 2.0734572852  | -2.2786109392 | 2.8158593506  |
| H  | 3.1192258081  | -3.599474142  | 0.9917358944  |
| Si | 0.5433880275  | 3.0523880399  | 1.2065089613  |
| H  | 1.6541241708  | 1.0757750236  | 0.1189247299  |
| C  | 2.4120418261  | 2.9687910637  | 1.6731517759  |
| C  | 0.4072152147  | 4.7141275604  | 0.2872565677  |
| C  | -0.3376488406 | 3.1416605027  | 2.8951358119  |
| H  | 2.6657710566  | 3.8568856363  | 2.2686406147  |
| H  | 2.678574899   | 2.0891647341  | 2.2701800673  |
| H  | 3.0609803137  | 2.9745931511  | 0.7881763165  |
| H  | 0.8104799946  | 5.5181233161  | 0.9180241023  |
| H  | -0.6250900151 | 4.9619905545  | 0.0271172406  |
| H  | 0.9978586651  | 4.6977226345  | -0.6372406917 |
| H  | -0.2167704316 | 2.2107586303  | 3.4643436357  |
| H  | 0.0990853876  | 3.9485515184  | 3.4992535295  |
| H  | -1.4086163918 | 3.3381430968  | 2.7876848509  |
| C  | -1.2221840315 | -2.697335651  | -0.0065080097 |
| C  | -0.7621776117 | -2.2759253647 | -1.2599955607 |
| C  | -1.251239155  | -4.058029801  | 0.3045906379  |
| C  | -0.3209403848 | -3.2229470915 | -2.1927979565 |
| C  | -0.8184217643 | -5.0014075789 | -0.6295379941 |
| H  | -1.6105573118 | -4.3796105585 | 1.2784318739  |

|   |               |               |               |
|---|---------------|---------------|---------------|
| C | -0.3531498087 | -4.5823626899 | -1.8778732695 |
| H | 0.0437366777  | -2.8914054082 | -3.1604616988 |
| H | -0.8422698837 | -6.0598799096 | -0.384888157  |
| H | -0.0139674756 | -5.312894696  | -2.6074601302 |
| H | -1.5529771884 | -1.9624573707 | 0.7211972344  |
| S | -0.7257613883 | -0.5286856676 | -1.6855370651 |
| C | -2.4191113616 | -0.318975366  | -2.3485775156 |
| H | -2.5863665255 | 0.7569221641  | -2.4305740097 |
| H | -2.492056754  | -0.8000174925 | -3.3264125324 |
| H | -3.154587183  | -0.7455083506 | -1.6633447888 |

47

**TS<sub>12c-13b</sub>** B3LYP/BSI Optimized geometry (charge = 0, singlet)

|    |               |               |               |
|----|---------------|---------------|---------------|
| Ni | 0.5030407669  | 0.079017482   | -0.2227223255 |
| S  | -0.6210513933 | 1.9942046093  | -0.6185314767 |
| C  | 1.8007278816  | -1.3007692797 | -0.1311578488 |
| C  | 2.3647666407  | -1.8671783661 | -1.2910674715 |
| C  | 2.2541655341  | -1.8103948138 | 1.102086925   |
| C  | 3.3103821248  | -2.8950652646 | -1.2274859164 |
| H  | 2.0663084917  | -1.5004800574 | -2.271825282  |
| C  | 3.2045236233  | -2.8358873132 | 1.1766208035  |
| H  | 1.8551410249  | -1.4117939305 | 2.0344527793  |
| C  | 3.7357984495  | -3.3858442941 | 0.0092788018  |
| H  | 3.721807892   | -3.3087540845 | -2.1462191152 |
| H  | 3.5275084527  | -3.2044100924 | 2.1483879198  |
| H  | 4.4738538633  | -4.1824914549 | 0.0616899212  |
| C  | -1.6335147174 | 2.5608828288  | 0.8074379707  |
| H  | -1.0139110773 | 2.7287001422  | 1.692756542   |
| H  | -2.112395479  | 3.5034237437  | 0.5305375732  |
| H  | -2.4051787909 | 1.824470451   | 1.0445045438  |
| H  | 1.611962631   | 0.8607483782  | -0.8564717207 |
| Si | 1.8127750829  | 2.3771910189  | 0.0056448044  |
| C  | 1.4956850388  | 4.2536545796  | -0.1370153596 |
| H  | 2.3814588444  | 4.8082737131  | 0.2038379336  |
| H  | 1.3028835779  | 4.5379063905  | -1.1776699931 |
| C  | 1.9947501365  | 1.9388168545  | 1.8419067209  |
| H  | 1.0459090392  | 1.909072952   | 2.388016897   |
| H  | 2.6200641542  | 2.7106690426  | 2.3109767335  |
| C  | 3.5274761633  | 2.2098069979  | -0.8236053954 |
| H  | 4.215409174   | 2.962503083   | -0.4152224761 |
| H  | 3.9510440401  | 1.2128037977  | -0.6644111357 |
| H  | 0.6337011283  | 4.5765089236  | 0.4563825521  |
| H  | 2.494863363   | 0.9742348897  | 1.9690682916  |
| H  | 3.4643655332  | 2.3756098208  | -1.9062874857 |
| S  | -1.0751110922 | -1.2705232168 | 0.6451833536  |
| C  | -2.7643623954 | -0.8559157487 | 0.1795582172  |
| C  | -0.9602136177 | -2.9491393211 | -0.0807128711 |
| C  | -3.102421901  | -0.5354436947 | -1.1407290337 |
| C  | -3.7480143007 | -0.866709271  | 1.1756058107  |
| H  | -1.743642592  | -3.5689992928 | 0.3602676327  |
| H  | -1.0692077847 | -2.9106091355 | -1.1662478583 |
| H  | 0.0262870181  | -3.335806665  | 0.1750547571  |
| C  | -4.4282764459 | -0.2421492432 | -1.4618289939 |
| H  | -2.3333162611 | -0.5009663549 | -1.9049689476 |
| C  | -5.0719599131 | -0.5657257179 | 0.8476029815  |
| H  | -3.4762247257 | -1.1131340109 | 2.1978681368  |
| C  | -5.4125581602 | -0.2561709507 | -0.4703399804 |
| H  | -4.6894253306 | 0.0069568215  | -2.4864738863 |



|   |               |               |               |
|---|---------------|---------------|---------------|
| H | -5.8341804536 | -0.5755958168 | 1.6217682769  |
| H | -6.4426712382 | -0.0224301292 | -0.7247223059 |

47

**13B** B3LYP/BSI Optimized geometry (charge = 0, singlet)

|    |               |               |               |
|----|---------------|---------------|---------------|
| Ni | 0.6626803286  | -0.0359065876 | -0.1821432221 |
| S  | -0.1123770144 | 2.0967326208  | -0.3277433402 |
| C  | 1.6617268774  | -1.6187785895 | -0.3088588987 |
| C  | 1.4709586791  | -2.5464241071 | -1.3531652606 |
| C  | 2.6036383157  | -1.9764675336 | 0.6776466634  |
| C  | 2.1505167334  | -3.768364711  | -1.3955237251 |
| H  | 0.7780337183  | -2.3150773942 | -2.1616179071 |
| C  | 3.2859399467  | -3.197297784  | 0.6465185097  |
| H  | 2.8169805743  | -1.2887508685 | 1.4957066122  |
| C  | 3.0608222602  | -4.1043947205 | -0.3911429593 |
| H  | 1.9717927561  | -4.4580170708 | -2.2189466901 |
| H  | 4.0011441814  | -3.4372747183 | 1.431726191   |
| H  | 3.59249014    | -5.0525420324 | -0.4215889138 |
| C  | -1.3791035193 | 2.6096087179  | 0.9111749054  |
| H  | -1.0504573111 | 2.410214913   | 1.9339035155  |
| H  | -1.6041619979 | 3.6708609222  | 0.7888343896  |
| H  | -2.2798665821 | 2.0273322784  | 0.7073920503  |
| H  | 1.8226144125  | 0.4462009106  | -0.9324533787 |
| Si | 1.6437085394  | 3.3159502057  | 0.2316246431  |
| C  | 1.0097805451  | 5.0529115582  | 0.6309152142  |
| H  | 1.8649796197  | 5.716843257   | 0.8117660568  |
| H  | 0.4353180166  | 5.4730092633  | -0.2024964436 |
| C  | 2.5257976178  | 2.576081112   | 1.7241846815  |
| H  | 1.8561128652  | 2.4614828731  | 2.5843371159  |
| H  | 3.3555469643  | 3.2258228528  | 2.0325560986  |
| C  | 2.7510001162  | 3.3536315136  | -1.2865376198 |
| H  | 3.6571221455  | 3.9344988048  | -1.0706352407 |
| H  | 3.0514278825  | 2.3425986353  | -1.5761024591 |
| H  | 0.3818577117  | 5.0789962766  | 1.5282689867  |
| H  | 2.9347248399  | 1.5912868827  | 1.4767900592  |
| H  | 2.2465092156  | 3.8210523587  | -2.1393579687 |
| S  | -1.0446036608 | -0.9164338828 | 1.0443265092  |
| C  | -2.5954957652 | -0.8577074337 | 0.1294071984  |
| C  | -0.8762153766 | -2.7252377743 | 1.2766557697  |
| C  | -2.5959974035 | -0.6829621057 | -1.2596284294 |
| C  | -3.8089947536 | -0.9623806608 | 0.82207741    |
| H  | -1.738297487  | -3.0931405322 | 1.8370686892  |
| H  | -0.784093589  | -3.2259875186 | 0.3120315497  |
| H  | 0.0436424396  | -2.8834910226 | 1.8423504702  |
| C  | -3.8070461989 | -0.624162524  | -1.9521728706 |
| H  | -1.6511144305 | -0.5911380476 | -1.7858562608 |
| C  | -5.0156032529 | -0.9121230347 | 0.1227995843  |
| H  | -3.8047654634 | -1.0806632164 | 1.9020290166  |
| C  | -5.0160349518 | -0.7422379995 | -1.2641032174 |
| H  | -3.802708133  | -0.488371506  | -3.0301151885 |
| H  | -5.9548993103 | -0.9976219172 | 0.6624457886  |
| H  | -5.9569632415 | -0.698485663  | -1.8056726845 |

47

**TS<sub>16B-17</sub>** B3LYP/BSI Optimized geometry (charge = 0, singlet)

|    |               |               |               |
|----|---------------|---------------|---------------|
| Ni | -1.1806862062 | -0.4307352321 | -0.1225932341 |
| S  | -1.9305388161 | -2.0929304549 | 0.9720296257  |

|    |               |               |               |
|----|---------------|---------------|---------------|
| C  | 0.3888022723  | 2.0233814248  | -0.1143037748 |
| C  | 0.8714900696  | 2.1565269232  | 1.1891064684  |
| C  | 1.0963363682  | 2.564570948   | -1.1902061169 |
| C  | 2.0754907838  | 2.8268116093  | 1.415392886   |
| H  | 0.3118581788  | 1.7380599591  | 2.0205326708  |
| C  | 2.2984848723  | 3.2373769681  | -0.9604363498 |
| H  | 0.7100300179  | 2.4650479286  | -2.2005597598 |
| C  | 2.7877784051  | 3.3670144062  | 0.3419095634  |
| H  | 2.4558969733  | 2.929623806   | 2.4279533691  |
| H  | 2.8496189015  | 3.6638787833  | -1.7944564515 |
| H  | 3.7226992507  | 3.8917037282  | 0.5206527916  |
| C  | -2.8312314408 | -3.1932747387 | -0.1969955885 |
| H  | -3.063874436  | -4.110619264  | 0.352581368   |
| H  | -3.7699819627 | -2.7409554695 | -0.5246793427 |
| H  | -2.2374070566 | -3.457914429  | -1.0763582232 |
| H  | -0.5790369927 | 1.5478716065  | -0.2937204308 |
| Si | -3.0852980402 | 0.6342119325  | 0.3271458583  |
| C  | -3.1471550389 | 2.140573341   | -0.8739122146 |
| H  | -3.1418605727 | 1.8226354203  | -1.9243865249 |
| H  | -4.0885455484 | 2.6822221599  | -0.7047655314 |
| C  | -4.7494022512 | -0.2344774394 | 0.0057658824  |
| H  | -4.9207521198 | -1.0642526607 | 0.6985110361  |
| H  | -5.5671085577 | 0.4878044816  | 0.1340814913  |
| C  | -3.1291192017 | 1.3208752414  | 2.1050646165  |
| H  | -4.0381273222 | 1.9159121478  | 2.267766793   |
| H  | -3.124265501  | 0.5030564392  | 2.8338823174  |
| H  | -2.3282265643 | 2.8543355177  | -0.7347763636 |
| H  | -2.2703380014 | 1.9696379432  | 2.3166876278  |
| H  | -4.8173519667 | -0.6209249785 | -1.0186645686 |
| S  | 0.7893107033  | -1.0364201432 | -1.3895254394 |
| C  | 2.1736185359  | -1.2119220351 | -0.2529183335 |
| C  | 0.5207283492  | -2.7775121029 | -1.8805943734 |
| C  | 2.0282935045  | -1.9142207301 | 0.9504872918  |
| C  | 3.3955370568  | -0.6166754462 | -0.5824526529 |
| H  | 1.4437949109  | -3.1854402564 | -2.2979837575 |
| H  | 0.1887022373  | -3.3669884194 | -1.0230654924 |
| H  | -0.2575515044 | -2.7750062522 | -2.6481755517 |
| C  | 3.1199454257  | -2.0328648508 | 1.8115547948  |
| H  | 1.0687489555  | -2.3531059743 | 1.2109198359  |
| C  | 4.4777957728  | -0.7300542145 | 0.2925281181  |
| H  | 3.4930047912  | -0.066425654  | -1.5128313707 |
| C  | 4.3434833261  | -1.441791124  | 1.4858417028  |
| H  | 3.0093394584  | -2.580507131  | 2.7435784928  |
| H  | 5.4265387645  | -0.2661677554 | 0.0367530547  |
| H  | 5.1889402458  | -1.5336223599 | 2.1622961404  |

47

**TS<sub>16B-18A</sub>** B3LYP/BSI Optimized geometry (charge = 0, singlet)

|    |               |               |               |
|----|---------------|---------------|---------------|
| Ni | -1.2559367256 | 0.2614650907  | -0.1286226624 |
| S  | -1.8524196355 | -1.7408263919 | 0.2341133797  |
| C  | -0.085640615  | 1.9461046313  | -0.4799490835 |
| C  | 0.5683185904  | 2.3900282721  | 0.6802953476  |
| C  | 0.5609394241  | 2.0341562464  | -1.7230968485 |
| C  | 1.8860050358  | 2.8401870193  | 0.60731334    |
| H  | 0.0484991672  | 2.3802282562  | 1.6336592284  |
| C  | 1.8745401096  | 2.4941532251  | -1.7921788695 |
| H  | 0.0401106976  | 1.7351951289  | -2.6277387018 |
| C  | 2.5383046835  | 2.8905421341  | -0.6270029171 |

|    |               |               |               |
|----|---------------|---------------|---------------|
| H  | 2.4012958535  | 3.1588289146  | 1.5088240583  |
| H  | 2.3794550888  | 2.5487842409  | -2.7524764435 |
| H  | 3.561496336   | 3.2518561638  | -0.6836165179 |
| C  | -2.527596899  | -2.2981143083 | -1.3878013441 |
| H  | -2.7482925229 | -3.3662462277 | -1.3039366333 |
| H  | -3.4560336532 | -1.7727649527 | -1.6278333296 |
| H  | -1.8127810676 | -2.150972028  | -2.2021587895 |
| H  | -1.2158222661 | 1.8805139746  | -0.479421108  |
| Si | -3.1647946108 | 0.8633924785  | 0.8564551949  |
| C  | -3.2699206912 | 2.7802355555  | 0.7974711321  |
| H  | -3.3372568341 | 3.1647064705  | -0.2277487677 |
| H  | -4.1749701824 | 3.1046544019  | 1.3299263579  |
| C  | -4.7679992178 | 0.2653048286  | 0.0284873012  |
| H  | -4.9042835104 | -0.814308019  | 0.1428665668  |
| H  | -5.6293031325 | 0.7701375962  | 0.4866367852  |
| C  | -3.173628387  | 0.4212395694  | 2.7058646961  |
| H  | -4.0662488006 | 0.8444215615  | 3.1867932123  |
| H  | -3.1762205154 | -0.6615356612 | 2.8619030749  |
| H  | -2.4150051083 | 3.2701871221  | 1.2786967006  |
| H  | -2.2974062613 | 0.8361812524  | 3.2191939144  |
| H  | -4.7845292807 | 0.5021126535  | -1.0424211987 |
| S  | 1.5366132819  | -1.3201914013 | -1.7122323863 |
| C  | 2.5583585923  | -1.1841274595 | -0.242139995  |
| C  | 1.0921384434  | -3.0959400245 | -1.6666949969 |
| C  | 2.0681905547  | -1.5328565934 | 1.0247133153  |
| C  | 3.861817278   | -0.686558995  | -0.3672117373 |
| H  | 1.9887073879  | -3.7124037035 | -1.5664347448 |
| H  | 0.3902681549  | -3.2954716278 | -0.8528137258 |
| H  | 0.6074205017  | -3.3205650819 | -2.6212166572 |
| C  | 2.8852240916  | -1.398071501  | 2.1481280915  |
| H  | 1.0522066097  | -1.9025204087 | 1.1270733495  |
| C  | 4.6666763455  | -0.5355346258 | 0.7640008855  |
| H  | 4.2427447642  | -0.4278845456 | -1.3506330802 |
| C  | 4.1829764515  | -0.8954190996 | 2.0230000351  |
| H  | 2.5011288669  | -1.677987016  | 3.1257319844  |
| H  | 5.6775462354  | -0.1502136917 | 0.6571477523  |
| H  | 4.8137687214  | -0.7880609743 | 2.9014612846  |

35

**17** B3LYP/BSI Optimized geometry (charge = 0, singlet)

|    |               |               |               |
|----|---------------|---------------|---------------|
| Ni | -0.692554373  | -0.0810130152 | 0.0631293913  |
| S  | 1.2479244872  | 0.9302689878  | 0.0769991071  |
| C  | 2.4074056863  | -0.3211215804 | -0.518370674  |
| C  | 3.7094860686  | 0.06556628    | -0.8556430626 |
| C  | 1.9993016044  | -1.6488265073 | -0.6797569015 |
| C  | 4.6108411972  | -0.8867468196 | -1.3317835348 |
| H  | 4.0113206464  | 1.1041890026  | -0.7523220439 |
| C  | 2.9039151161  | -2.593214563  | -1.1677895165 |
| H  | 0.9793933196  | -1.9402849082 | -0.4389465658 |
| C  | 4.2089924184  | -2.2159467366 | -1.4886164998 |
| H  | 5.6227693273  | -0.5879975808 | -1.5909776671 |
| H  | 2.5842998643  | -3.6233864322 | -1.2966256122 |
| H  | 4.9107563439  | -2.9537790768 | -1.867380823  |
| C  | 1.8282127835  | 1.1196596696  | 1.8105650624  |
| H  | 1.7618400453  | 0.1741664125  | 2.3524035425  |
| H  | 2.8594315872  | 1.4789861252  | 1.801960538   |
| H  | 1.1845143166  | 1.8652187918  | 2.2818346461  |
| S  | -2.1733425573 | -1.5494258695 | -0.1807997791 |

|    |               |               |               |
|----|---------------|---------------|---------------|
| C  | -2.6235498852 | -2.1864852607 | 1.4913043817  |
| H  | -3.2520356609 | -3.0695698263 | 1.3457346844  |
| H  | -1.7478551949 | -2.4752334883 | 2.0784348298  |
| H  | -3.1979544658 | -1.4413754382 | 2.0482082543  |
| Si | -2.0826366033 | 1.6393988076  | 0.2248402743  |
| C  | -1.171588595  | 3.2243584874  | 0.7984644384  |
| H  | -1.87092056   | 4.0714999044  | 0.7622394121  |
| H  | -0.819341189  | 3.1452328878  | 1.834984986   |
| H  | -0.3139361828 | 3.4771715301  | 0.164848736   |
| C  | -3.492569898  | 1.4126743839  | 1.4809914639  |
| H  | -4.0595936915 | 2.3485299247  | 1.5808126344  |
| H  | -4.1853542103 | 0.6260815262  | 1.1652671132  |
| H  | -3.1138200752 | 1.1531531038  | 2.4772218248  |
| C  | -2.8229135845 | 2.0211215381  | -1.4847933271 |
| H  | -3.415596425  | 1.1768580444  | -1.8518145287 |
| H  | -3.4755091553 | 2.9034560151  | -1.4288574538 |
| H  | -2.0414875052 | 2.2321036799  | -2.2243933309 |

35

**TS17-19** B3LYP/BSI Optimized geometry (charge = 0, singlet)

|    |               |               |               |
|----|---------------|---------------|---------------|
| Ni | 0.1737686217  | -1.4180371281 | 0.0614892982  |
| S  | 2.006207566   | -0.5098377977 | -0.2974953956 |
| C  | 3.2104246167  | -1.7764322343 | -0.7682795766 |
| C  | 4.4891984614  | -1.4332025486 | -1.2195990309 |
| C  | 2.8108891239  | -3.1165390192 | -0.7448762708 |
| C  | 5.373484557   | -2.4360491126 | -1.6203152431 |
| H  | 4.7904670754  | -0.3900037804 | -1.2651009686 |
| C  | 3.6938454211  | -4.1139909589 | -1.1588764479 |
| H  | 1.8016393647  | -3.3381634852 | -0.4079403877 |
| C  | 4.9780518364  | -3.7763895168 | -1.5914106296 |
| H  | 6.3687197901  | -2.1695802504 | -1.9666523956 |
| H  | 3.3796276694  | -5.1542157088 | -1.139737954  |
| H  | 5.6679881626  | -4.5529949423 | -1.9104116424 |
| C  | 2.8640067784  | 0.1734523406  | 1.1912251271  |
| H  | 3.0059877428  | -0.5946285519 | 1.9543207991  |
| H  | 3.8288335455  | 0.594393223   | 0.8979178513  |
| H  | 2.2268838002  | 0.9694001458  | 1.5848781333  |
| S  | -1.7503473604 | -2.2181229433 | 0.0866400769  |
| C  | -2.2927536891 | -2.9760245114 | 1.6975487131  |
| H  | -3.3773195664 | -3.1033989878 | 1.6778389204  |
| H  | -1.8113883075 | -3.9528200376 | 1.7769087691  |
| H  | -2.0035309732 | -2.3655982167 | 2.5558055441  |
| Si | -2.2905434875 | -0.0576232997 | 0.3081889759  |
| C  | -1.4112060987 | 0.9236614158  | 1.6725205333  |
| H  | -2.0119059901 | 1.7993486751  | 1.9585850223  |
| H  | -1.268803789  | 0.3168022534  | 2.5739913179  |
| H  | -0.4267383219 | 1.2669583484  | 1.3422822278  |
| C  | -4.1243306757 | -0.1066764298 | 0.8093541548  |
| H  | -4.5199736172 | 0.9154676441  | 0.8791801692  |
| H  | -4.7324068432 | -0.6517733426 | 0.0782969388  |
| H  | -4.2714109073 | -0.5790092233 | 1.7880268146  |
| C  | -2.1662697577 | 0.7580773493  | -1.3898704682 |
| H  | -2.5220117071 | 0.0788222113  | -2.1725029603 |
| H  | -2.7977294585 | 1.6566315135  | -1.4151735054 |
| H  | -1.1405627729 | 1.048139637   | -1.6354684005 |

35

36

**19** B3LYP/BSI Optimized geometry (charge = 0, singlet)

|    |               |               |               |
|----|---------------|---------------|---------------|
| Ni | -0.2237876957 | -0.0282657429 | 0.1883005835  |
| S  | 1.6345911016  | 0.7819833739  | -0.1853859882 |
| C  | 2.7888237206  | -0.5089199522 | -0.7145091061 |
| C  | 4.0619080059  | -0.1945113319 | -1.2019528081 |
| C  | 2.3533978974  | -1.838178616  | -0.7006479071 |
| C  | 4.9039396563  | -1.2140793837 | -1.6490392974 |
| H  | 4.3913446404  | 0.8405122248  | -1.2396565667 |
| C  | 3.193416552   | -2.8524843237 | -1.1606261219 |
| H  | 1.3498121533  | -2.0349363078 | -0.3336579807 |
| C  | 4.4719442798  | -2.5432660862 | -1.6299192017 |
| H  | 5.8946150809  | -0.9691870097 | -2.0234949024 |
| H  | 2.8507156819  | -3.8838700508 | -1.1483521553 |
| H  | 5.1288984517  | -3.332981909  | -1.9845692525 |
| C  | 2.5550433122  | 1.4047250542  | 1.2948059523  |
| H  | 2.6832805476  | 0.6191224311  | 2.0423948548  |
| H  | 3.5294258396  | 1.79161917    | 0.9856724777  |
| H  | 1.9583858371  | 2.2183917722  | 1.714746319   |
| S  | -2.2148751761 | -0.6699375396 | 0.2357672648  |
| C  | -2.7824658552 | -1.5366579521 | 1.7811051126  |
| H  | -3.8586957256 | -1.7152689915 | 1.719037427   |
| H  | -2.2583820924 | -2.4936440889 | 1.8186232735  |
| H  | -2.5459816158 | -0.9639513935 | 2.6805444195  |
| Si | -3.2033789198 | 1.2966888929  | 0.3888007508  |
| C  | -2.5409791918 | 2.2989200849  | 1.8455815142  |
| H  | -3.0734258696 | 3.2561268505  | 1.928260358   |
| H  | -2.6617314513 | 1.769807426   | 2.7980519449  |
| H  | -1.4741935397 | 2.5025554843  | 1.7079399006  |
| C  | -5.0636102655 | 1.0146677975  | 0.5963549073  |
| H  | -5.5883768121 | 1.9789701351  | 0.6018792643  |
| H  | -5.4706490666 | 0.4166726785  | -0.2266387883 |
| H  | -5.3043463085 | 0.5061508729  | 1.5369838459  |
| C  | -2.843069281  | 2.1607707739  | -1.2449381666 |
| H  | -3.2327607697 | 1.5892507749  | -2.0946512939 |
| H  | -3.311595148  | 3.1534563774  | -1.261243946  |
| H  | -1.7649759741 | 2.2842995045  | -1.3878126879 |

31

**18A** B3LYP/BSI Optimized geometry (charge = 0, singlet)

|    |               |               |               |
|----|---------------|---------------|---------------|
| Ni | -0.3382812189 | 0.0333814248  | -0.0689639664 |
| S  | 0.5023921331  | 1.979866557   | -0.5001444121 |
| H  | -0.9494542282 | -2.5356031809 | -1.0155815506 |
| Si | 1.796178173   | -0.6022368612 | -0.0752478914 |
| C  | 2.9156792988  | 0.1761195382  | 1.2500089667  |
| H  | 2.4629941096  | 0.1119076938  | 2.2475189522  |
| H  | 3.8699340949  | -0.3664728207 | 1.2922969609  |
| C  | 1.8566287931  | -2.4765496713 | 0.3458295949  |
| H  | 1.2611142308  | -3.1013851419 | -0.3303477743 |
| H  | 2.8991953959  | -2.8131884081 | 0.2577409523  |
| C  | 2.5947114885  | -0.4724220983 | -1.7950420617 |
| H  | 3.6035536484  | -0.907005401  | -1.7741071526 |
| H  | 2.0150223387  | -1.0270590032 | -2.543341878  |
| H  | 3.127943143   | 1.2277722003  | 1.0375010364  |
| H  | 2.671808991   | 0.5671242919  | -2.1256166809 |
| H  | 1.53885221    | -2.6894995503 | 1.3738570785  |
| C  | -1.4325014656 | -1.6906809177 | -0.5374730048 |
| C  | -2.260715023  | -0.8286983108 | -1.2970694639 |
| C  | -1.3208091242 | -1.5159624744 | 0.8657612497  |

|   |               |               |               |
|---|---------------|---------------|---------------|
| C | -2.906149822  | 0.2333436571  | -0.6688256134 |
| H | -2.3651270141 | -0.9817161455 | -2.3661709849 |
| C | -2.0031183276 | -0.4444050411 | 1.4940732669  |
| H | -0.7647250279 | -2.2315290345 | 1.4597380102  |
| C | -2.76638273   | 0.4338884519  | 0.7231234208  |
| H | -3.4945488562 | 0.9332059693  | -1.2529854018 |
| H | -1.9231667866 | -0.3060451508 | 2.567379603   |
| H | -3.2540113899 | 1.2821973786  | 1.1927359308  |
| C | 0.4123380838  | 2.8517112979  | 1.1192969818  |
| H | 0.7564704585  | 3.8778942095  | 0.9595503119  |
| H | -0.6091189266 | 2.8849589565  | 1.5101619055  |
| H | 1.06424935    | 2.3835785853  | 1.8629206146  |

31

**TS<sub>18A-20</sub>** B3LYP/BSI Optimized geometry (charge = 0, singlet)

|    |               |               |               |
|----|---------------|---------------|---------------|
| Ni | -0.394056159  | -0.5719147565 | -1.0380517994 |
| S  | 0.4914402757  | 1.3924980574  | -1.3671941697 |
| H  | -1.8095712667 | -2.4417939718 | -1.9450314737 |
| Si | 1.7611302225  | -0.5004755849 | -0.6268520188 |
| C  | 2.4962805236  | 0.0505623155  | 1.0289147729  |
| H  | 1.7489813305  | 0.0099599501  | 1.8299977581  |
| H  | 3.3147048844  | -0.6244227823 | 1.3114948683  |
| C  | 1.3088981937  | -2.3857246687 | -0.3560217679 |
| H  | 0.6275609532  | -2.8440116289 | -1.0803155612 |
| H  | 2.2665570726  | -2.9149977296 | -0.4687371387 |
| C  | 3.0624362212  | -0.4886557452 | -2.0033679145 |
| H  | 3.8607619295  | -1.208697266  | -1.7814488892 |
| H  | 2.6207267844  | -0.7719933542 | -2.9660847135 |
| H  | 2.900159064   | 1.0675156301  | 0.9867129204  |
| H  | 3.5153485613  | 0.5003594175  | -2.1228553235 |
| H  | 0.9313645704  | -2.5882018855 | 0.6507299296  |
| C  | -2.0065733186 | -1.7101489485 | -1.1611248992 |
| C  | -2.5184962802 | -0.4166365968 | -1.4882528335 |
| C  | -2.028698223  | -2.1142025308 | 0.2024424851  |
| C  | -3.1717824879 | 0.3474144981  | -0.4935803419 |
| H  | -2.619694684  | -0.1227582705 | -2.5289095397 |
| C  | -2.6246360465 | -1.3176837957 | 1.1772459768  |
| H  | -1.6311634967 | -3.0884503799 | 0.4726134851  |
| C  | -3.2268743534 | -0.0972858129 | 0.8219196619  |
| H  | -3.6334777306 | 1.2918433676  | -0.7700756739 |
| H  | -2.6445083443 | -1.6542850724 | 2.2101650286  |
| H  | -3.7313623633 | 0.4984735996  | 1.5777500128  |
| C  | -0.0849631313 | 2.3558619603  | 0.0954257441  |
| H  | 0.2415586921  | 3.3899997862  | -0.0419989329 |
| H  | -1.1748511712 | 2.3194441322  | 0.167738183   |
| H  | 0.3453330172  | 1.9680135963  | 1.0216191646  |

31

**20** B3LYP/BSI Optimized geometry (charge = 0, singlet)

|    |               |               |               |
|----|---------------|---------------|---------------|
| Ni | 0.1013402928  | 0.3280466718  | 0.1024176881  |
| S  | 0.0094861688  | -0.8645499113 | 1.9053633344  |
| C  | 1.0504706845  | 1.5924587966  | -1.2723089603 |
| C  | -1.732633363  | -0.6575909824 | 2.4648602838  |
| C  | 1.7076967602  | 2.1466342026  | -0.1467400554 |
| C  | -0.3611700809 | 1.6751595344  | -1.3841890629 |
| H  | -1.8347339246 | -1.1791290986 | 3.4211911844  |
| H  | -1.9925412384 | 0.3947934012  | 2.613816442   |

|    |               |               |               |
|----|---------------|---------------|---------------|
| H  | -2.4366589536 | -1.102364259  | 1.7551762422  |
| C  | 0.9542677542  | 2.7075516451  | 0.8812998991  |
| H  | 2.7897307426  | 2.1056934886  | -0.0772763884 |
| C  | -1.1121885801 | 2.2704551139  | -0.3400637302 |
| H  | -0.8552241213 | 1.3380030705  | -2.2876851689 |
| C  | -0.4552723229 | 2.7567946284  | 0.7914245939  |
| H  | 1.4460542872  | 3.080634207   | 1.7736126883  |
| H  | -2.1922599966 | 2.3382034332  | -0.4199405993 |
| H  | -1.0292643797 | 3.1725388124  | 1.6133976622  |
| Si | -0.0207493042 | -1.6550280333 | -0.9038604574 |
| H  | 1.632578991   | 1.1793913834  | -2.0886095548 |
| C  | -0.0417364304 | -1.3543905005 | -2.802083811  |
| C  | 1.5213556378  | -2.7253968454 | -0.6066208533 |
| C  | -1.6080198245 | -2.6587474408 | -0.6062342814 |
| H  | -0.0138414773 | -2.3321186916 | -3.3033840935 |
| H  | -0.9545698518 | -0.8488934618 | -3.1402639022 |
| H  | 0.8191090217  | -0.7828209307 | -3.1688734098 |
| H  | 1.467931732   | -3.6378512261 | -1.2162409057 |
| H  | 1.6139926294  | -3.0151310722 | 0.4437773956  |
| H  | 2.4351542076  | -2.1916665552 | -0.8959649639 |
| H  | -2.5058680893 | -2.0498033953 | -0.7709817241 |
| H  | -1.6521509337 | -3.4981011835 | -1.3135787965 |
| H  | -1.6501850376 | -3.0630268013 | 0.4091343049  |

39

**21** B3LYP/BSI Optimized geometry (charge = 0, singlet)

|    |               |               |               |
|----|---------------|---------------|---------------|
| Ni | -0.7790386706 | -0.0685160671 | -0.1952535945 |
| S  | 0.9814778745  | -0.82475763   | 0.6788783111  |
| C  | 1.086427543   | -2.3876986414 | 1.6672304435  |
| H  | 0.0678886227  | -2.7777937852 | 1.7285256032  |
| H  | 1.7240822228  | -3.1253154389 | 1.1723270354  |
| H  | 1.4561551758  | -2.1887918331 | 2.6766306226  |
| C  | -1.4365802279 | 1.788424698   | -0.5967595574 |
| C  | -0.9299015164 | 1.2122178582  | -1.7650809959 |
| C  | -2.9110269912 | 1.8755135338  | -0.2144792236 |
| H  | -0.7886149828 | 2.5029133904  | -0.0850221816 |
| C  | -1.7616583193 | 0.4699816483  | -2.797349194  |
| H  | 0.0412047147  | 1.5562179428  | -2.1225827703 |
| C  | -3.3620563242 | 0.7036119905  | 0.7074081872  |
| H  | -3.5329623356 | 1.9083127228  | -1.1148508085 |
| H  | -3.0941857055 | 2.823645945   | 0.3062864844  |
| C  | -2.8365541755 | -0.4729921106 | -2.1763351461 |
| H  | -1.0758846178 | -0.1321226635 | -3.4079535249 |
| H  | -2.2497385844 | 1.1682431583  | -3.4968117341 |
| C  | -2.6562148941 | -0.6083986885 | 0.4123975108  |
| H  | -3.1432028446 | 0.9720205582  | 1.749360642   |
| H  | -4.4573452985 | 0.5931739038  | 0.6510274377  |
| C  | -2.3831831674 | -1.1022920731 | -0.8635296279 |
| H  | -3.7745264768 | 0.0716317389  | -2.0283548595 |
| H  | -3.0658462136 | -1.2672245864 | -2.8975799108 |
| H  | -2.6216150034 | -1.3093294168 | 1.2474062464  |
| H  | -2.0978904477 | -2.1538427932 | -0.9311357645 |
| Si | 3.0628340197  | -0.1557834994 | 0.5912308008  |
| C  | 4.1201956206  | -1.4159394383 | -0.3426946785 |
| H  | 5.1572153156  | -1.0651334722 | -0.4245732162 |
| H  | 4.141652728   | -2.3883129549 | 0.1629246232  |
| H  | 3.7358384295  | -1.5728710543 | -1.3566185429 |
| C  | 2.9731785284  | 1.4757409263  | -0.3494184377 |

|   |              |              |               |
|---|--------------|--------------|---------------|
| H | 2.5390795155 | 1.3350356846 | -1.3451039859 |
| H | 2.3569679823 | 2.2078450585 | 0.1839452278  |
| H | 3.9761208794 | 1.90309468   | -0.4732855862 |
| C | 3.7438545585 | 0.1098366138 | 2.3360898231  |
| H | 3.7664483246 | -0.820634096 | 2.9149936592  |
| H | 4.7710820441 | 0.4948432717 | 2.2935829138  |
| H | 3.1348276978 | 0.834823919  | 2.8873847688  |

51

TS<sub>5A-22</sub> B3LYP/BSI Optimized geometry (charge = 0, singlet)

|    |               |               |               |
|----|---------------|---------------|---------------|
| Ni | 0.6449949475  | -0.1462385033 | -0.0982196221 |
| S  | 0.6908384138  | -2.2717515171 | -0.3603876395 |
| C  | 2.4844542658  | -0.0095975643 | 0.1292320658  |
| C  | 2.2739758382  | -2.9513723667 | -0.9909121339 |
| C  | 3.0771100118  | -0.2214634572 | 1.3811639189  |
| C  | 3.2868786241  | 0.3991997424  | -0.9434827356 |
| H  | 2.5755684058  | -2.4728375347 | -1.9256348673 |
| H  | 3.0690688695  | -2.828717414  | -0.252354337  |
| H  | 2.1130909947  | -4.0175783784 | -1.1724076907 |
| C  | 4.4503672492  | -0.0215926429 | 1.5551664867  |
| H  | 2.476425294   | -0.5571235889 | 2.2221784526  |
| C  | 4.6613062605  | 0.5953607421  | -0.7652613634 |
| H  | 2.8555306348  | 0.5536858762  | -1.9297382145 |
| C  | 5.2471638368  | 0.389225009   | 0.4840968842  |
| H  | 4.8961936751  | -0.1928153746 | 2.5324151841  |
| H  | 5.2709897748  | 0.9104094134  | -1.6091682856 |
| H  | 6.3144320691  | 0.541233745   | 0.6213375789  |
| Si | -2.9932773057 | -1.8790187124 | 0.1363580521  |
| H  | -1.8942096849 | -0.8465265033 | 0.1909472422  |
| C  | -4.6250466057 | -0.9917740073 | 0.5173426696  |
| C  | -3.0224226256 | -2.6062836288 | -1.6049643557 |
| C  | -2.6247318387 | -3.1878231762 | 1.4450276502  |
| H  | -5.4628627276 | -1.7002509665 | 0.49874869    |
| H  | -4.6106144765 | -0.5258606442 | 1.5097592043  |
| H  | -4.8435569984 | -0.2070975992 | -0.2169331095 |
| H  | -3.2681810978 | -1.8442663142 | -2.3544660886 |
| H  | -3.7688364033 | -3.4061931482 | -1.6871761274 |
| H  | -2.0409907978 | -3.0228092435 | -1.8550759969 |
| H  | -3.36517823   | -3.9969281306 | 1.4147636078  |
| H  | -1.6329849787 | -3.6211325454 | 1.2776639033  |
| H  | -2.6408994156 | -2.7601898737 | 2.4547561232  |
| C  | 0.1982175835  | 1.673485273   | 0.7486133402  |
| C  | 0.1706329979  | 1.7412627366  | -0.6407033541 |
| C  | -0.9632482135 | 1.6386642955  | 1.7359715065  |
| H  | 1.1380154349  | 1.975356202   | 1.2061493272  |
| C  | -1.0472787099 | 1.7701291439  | -1.5425216344 |
| H  | 1.0743844558  | 2.1261452067  | -1.1141335456 |
| C  | -2.3276264653 | 2.1847683846  | 1.2504306577  |
| H  | -0.6460273264 | 2.2329743728  | 2.6027719923  |
| H  | -1.1153877503 | 0.621481666   | 2.1243819176  |
| C  | -1.5842227301 | 3.205607242   | -1.7519236602 |
| H  | -1.8378847971 | 1.1157749106  | -1.1713022249 |
| H  | -0.7664584771 | 1.3733446475  | -2.5265024777 |
| C  | -2.2754303536 | 3.5961383631  | 0.7108585004  |
| H  | -2.7662651661 | 1.4997700774  | 0.5224049998  |
| H  | -3.0048962104 | 2.1658829836  | 2.11366705    |
| C  | -1.972383564  | 4.0032620222  | -0.5282203743 |
| H  | -0.816671032  | 3.7801827915  | -2.2902926329 |



|   |               |              |               |
|---|---------------|--------------|---------------|
| H | -2.4406966778 | 3.1587520838 | -2.44323105   |
| H | -2.5037598283 | 4.3761176798 | 1.4376970845  |
| H | -2.0056501492 | 5.0787002247 | -0.7083045684 |

51

**22** B3LYP/BSI Optimized geometry (charge = 0, singlet)

|    |               |               |               |
|----|---------------|---------------|---------------|
| Ni | -0.3576443649 | -0.2474136378 | 0.4127075902  |
| S  | -2.2860821806 | 0.595870894   | 0.9269890996  |
| C  | -1.0638716235 | -1.9813956665 | 0.4646600625  |
| C  | -3.6962448208 | -0.5624958033 | 1.0974857199  |
| C  | -1.0479812756 | -2.7328018988 | 1.6481969175  |
| C  | -1.5398079092 | -2.5872425955 | -0.7070388134 |
| H  | -3.885338093  | -1.1020497032 | 0.1670382622  |
| H  | -3.5245841136 | -1.2846151688 | 1.898426417   |
| H  | -4.5703085134 | 0.0472609446  | 1.343425712   |
| C  | -1.4938442488 | -4.0590697201 | 1.6584578127  |
| H  | -0.7023602664 | -2.2841167902 | 2.5766676674  |
| C  | -1.985491075  | -3.9134955032 | -0.6954509064 |
| H  | -1.578854663  | -2.0255044399 | -1.6377578169 |
| C  | -1.9623857256 | -4.6556793387 | 0.4866396213  |
| H  | -1.4752161117 | -4.6236476699 | 2.5881513365  |
| H  | -2.3522861856 | -4.3639940108 | -1.615230668  |
| H  | -2.3095062712 | -5.6855410546 | 0.4954055232  |
| Si | -0.0617138955 | 3.1305186424  | 0.0138412176  |
| H  | 0.2346329365  | 1.6666923775  | 0.3530310985  |
| C  | 1.604703968   | 3.9878734733  | -0.2584549414 |
| C  | -1.0863453042 | 3.1610861774  | -1.5647695651 |
| C  | -0.9345365413 | 3.886446249   | 1.4987755078  |
| H  | 1.432917093   | 5.053615082   | -0.4588281525 |
| H  | 2.2489676763  | 3.9225898399  | 0.6255751388  |
| H  | 2.1572600977  | 3.5823806434  | -1.1134231488 |
| H  | -0.5480918437 | 2.6955525352  | -2.3988165582 |
| H  | -1.3179330982 | 4.1941903397  | -1.8532789017 |
| H  | -2.0268314801 | 2.6215978268  | -1.4167394489 |
| H  | -1.2368535645 | 4.9186845309  | 1.2810046445  |
| H  | -1.8268452649 | 3.3080328997  | 1.7552859511  |
| H  | -0.2761996062 | 3.9094440437  | 2.3751994537  |
| C  | 1.5885443433  | -0.8324151082 | 0.7356967538  |
| C  | 1.327683367   | -0.7953948385 | -0.6297911042 |
| C  | 2.4495241628  | 0.1077860179  | 1.5714761718  |
| H  | 1.4337278459  | -1.8009454014 | 1.2062103676  |
| C  | 1.8676643926  | 0.1854901682  | -1.6472738049 |
| H  | 1.0249798344  | -1.7429019352 | -1.074491628  |
| C  | 3.5984445236  | 0.8458910092  | 0.8386234587  |
| H  | 2.8893154133  | -0.5030340663 | 2.3700219608  |
| H  | 1.8311276538  | 0.855108378   | 2.0879482384  |
| C  | 3.2398360121  | -0.2698076165 | -2.1992099076 |
| H  | 1.938418695   | 1.1949046203  | -1.243776431  |
| H  | 1.1713752596  | 0.2435908032  | -2.4944599396 |
| C  | 4.5150573636  | -0.0568217523 | 0.044192912   |
| H  | 3.1905806123  | 1.6365112345  | 0.2065213206  |
| H  | 4.1909854523  | 1.3608323311  | 1.6056279991  |
| C  | 4.3582721412  | -0.5040453627 | -1.2084442649 |
| H  | 3.0902729651  | -1.2072190811 | -2.7538724537 |
| H  | 3.5710152368  | 0.4584110864  | -2.9569339438 |
| H  | 5.4090514041  | -0.3889214438 | 0.5725704938  |
| H  | 5.1525965903  | -1.1414925412 | -1.599319032  |

51

**TS<sub>22-23A</sub>** B3LYP/BSI Optimized geometry (charge = 0, singlet)

|    |               |               |               |
|----|---------------|---------------|---------------|
| Ni | -1.4200963365 | 0.3495420474  | -0.2077221489 |
| S  | -3.2293312869 | 0.1976298946  | -1.2941408451 |
| C  | -1.3064033632 | -1.4146098953 | 0.3017077006  |
| C  | -4.2028008832 | -1.3183735682 | -0.9493559758 |
| C  | -1.4329429533 | -1.7539290559 | 1.6619721594  |
| C  | -0.8538897592 | -2.411363004  | -0.5840406534 |
| H  | -3.697175749  | -2.2137372669 | -1.315790575  |
| H  | -4.4072709734 | -1.4335264673 | 0.1175586519  |
| H  | -5.1510004065 | -1.1974232647 | -1.4832135091 |
| C  | -1.0767136612 | -3.0248687669 | 2.1264654507  |
| H  | -1.8199884449 | -1.0300947905 | 2.3767509739  |
| C  | -0.4985328082 | -3.6817385296 | -0.1226672084 |
| H  | -0.7888880461 | -2.197098581  | -1.6484335112 |
| C  | -0.6054990698 | -3.9907845876 | 1.2363464839  |
| H  | -1.1763857353 | -3.2612882023 | 3.1836536454  |
| H  | -0.1477251196 | -4.434613266  | -0.8253358675 |
| H  | -0.3360393323 | -4.9808065355 | 1.5954968751  |
| Si | -1.1652507519 | 2.8780693151  | 0.3814681855  |
| H  | -1.0947336291 | 1.8898114848  | -0.8081617554 |
| C  | 0.3122434077  | 3.9859614014  | 0.0105800843  |
| C  | -2.8157539236 | 3.7663176924  | 0.2853755194  |
| C  | -0.9255096632 | 2.0135169176  | 2.0541715206  |
| H  | 0.4094242097  | 4.7739495764  | 0.7677407307  |
| H  | 1.2378577065  | 3.3997600156  | 0.0086510731  |
| H  | 0.2160031063  | 4.4715632875  | -0.9670645214 |
| H  | -2.9286866696 | 4.2795726729  | -0.6760492256 |
| H  | -2.9027064033 | 4.5164465659  | 1.0812063933  |
| H  | -3.6419715782 | 3.0549437754  | 0.3814652297  |
| H  | -0.5074478221 | 2.7358046453  | 2.7686601831  |
| H  | -1.8764332543 | 1.6551943122  | 2.4606741872  |
| H  | -0.2324504095 | 1.1640600954  | 2.0228448961  |
| C  | 2.82893258    | 0.9290363654  | 0.7888705168  |
| C  | 2.0891752194  | 0.3174115782  | -0.1456380615 |
| C  | 4.2941650306  | 1.2935500106  | 0.7997276198  |
| H  | 2.311394716   | 1.2099642541  | 1.7079966867  |
| C  | 2.4955405561  | -0.2194365966 | -1.4999690168 |
| H  | 1.044420118   | 0.1223305243  | 0.110486187   |
| C  | 5.2054019483  | 0.6597995033  | -0.273619704  |
| H  | 4.6904152104  | 1.0299685     | 1.7914746181  |
| H  | 4.3860491546  | 2.3901559201  | 0.7392381106  |
| C  | 3.1439044471  | -1.6194890827 | -1.4361872462 |
| H  | 3.1510582462  | 0.4769116406  | -2.0283758882 |
| H  | 1.5934446599  | -0.3053196751 | -2.1183059173 |
| C  | 5.2857989696  | -0.8505349942 | -0.1950859702 |
| H  | 4.898616518   | 0.9951897681  | -1.2674457154 |
| H  | 6.2135563521  | 1.0667293574  | -0.1257606032 |
| C  | 4.4355667369  | -1.7692648023 | -0.6706133535 |
| H  | 2.412922901   | -2.3147658816 | -0.9990550515 |
| H  | 3.3013593684  | -1.9787515535 | -2.4660521126 |
| H  | 6.1506541314  | -1.2299024079 | 0.3500680664  |
| H  | 4.7012427393  | -2.8115903463 | -0.4860733121 |

31

**23A** B3LYP/BSI Optimized geometry (charge = 0, singlet)

|    |               |              |               |
|----|---------------|--------------|---------------|
| Ni | -1.2476530345 | 0.4814457575 | -0.2251873979 |
|----|---------------|--------------|---------------|

|    |               |               |               |
|----|---------------|---------------|---------------|
| S  | -1.3602548472 | -0.1420206495 | -2.260412018  |
| C  | -1.9556529234 | -1.1143502283 | 0.4512083991  |
| C  | -2.0552924116 | -1.815975266  | -2.5393230449 |
| C  | -3.3221950792 | -1.2164982985 | 0.7608548287  |
| C  | -1.1186066426 | -2.186118672  | 0.804083451   |
| H  | -1.4408880375 | -2.5922975498 | -2.0793051102 |
| H  | -3.0768153488 | -1.8971667649 | -2.161791641  |
| H  | -2.0607167186 | -1.9589171308 | -3.624630974  |
| C  | -3.8331203715 | -2.344352747  | 1.411235048   |
| H  | -4.0058254854 | -0.4150558827 | 0.4867055893  |
| C  | -1.6259778366 | -3.314108137  | 1.4574180007  |
| H  | -0.058529159  | -2.1528520036 | 0.5605313719  |
| C  | -2.9856320807 | -3.3967082647 | 1.7636314008  |
| H  | -4.8953985188 | -2.4011888229 | 1.6392892439  |
| H  | -0.9575193822 | -4.1304661794 | 1.722503256   |
| H  | -3.3823394326 | -4.2752796836 | 2.2660858765  |
| Si | -1.014057663  | 2.8379696706  | 0.2068257599  |
| H  | -0.5573442704 | 1.8788277601  | -0.9079400847 |
| C  | 0.4991810521  | 3.9248359607  | 0.4697466661  |
| C  | -2.5388741881 | 3.7880139055  | -0.3374554769 |
| C  | -1.294127728  | 1.7517969024  | 1.747207905   |
| H  | 0.3300068711  | 4.6485075789  | 1.2764462748  |
| H  | 1.3668639039  | 3.3130829297  | 0.7421063828  |
| H  | 0.7559232088  | 4.4865624119  | -0.4351271018 |
| H  | -2.3597656655 | 4.2874468743  | -1.2960511325 |
| H  | -2.8036735788 | 4.5562149408  | 0.3994037612  |
| H  | -3.398971196  | 3.1225112939  | -0.4631403617 |
| H  | -0.5538651815 | 2.0474715432  | 2.4998239684  |
| H  | -2.2966954892 | 1.876791503   | 2.1652169732  |
| H  | -1.1423747654 | 0.6532402482  | 1.6525081865  |

31

**23B** B3LYP/BSI Optimized geometry (charge = 0, singlet)

|    |               |               |               |
|----|---------------|---------------|---------------|
| Ni | 0.3409217449  | 0.3120970901  | 0.9468155713  |
| S  | 2.2199510218  | -0.1381082267 | 1.7404374693  |
| H  | -1.1509506941 | 0.8798778593  | 0.8868962777  |
| Si | -1.1480824851 | 2.0574912756  | -0.1462891846 |
| C  | 0.4256814684  | 2.4636663502  | -1.1136768537 |
| H  | 0.7438320498  | 1.6329588302  | -1.75073639   |
| H  | 0.2134203918  | 3.3200388373  | -1.7697153267 |
| C  | -2.5098564257 | 1.5169455675  | -1.3243102203 |
| H  | -3.449626542  | 1.3170596097  | -0.7981390188 |
| H  | -2.7024536588 | 2.2867245008  | -2.0814489182 |
| C  | -1.6033778863 | 3.5164926713  | 0.9575818189  |
| H  | -1.7955919429 | 4.411953024   | 0.3536002688  |
| H  | -2.5009950614 | 3.3136902069  | 1.5520425813  |
| H  | 1.2633009651  | 2.7441583495  | -0.4671739981 |
| H  | -0.7877613686 | 3.7547057502  | 1.6504518654  |
| H  | -2.21138204   | 0.5977511774  | -1.8401724126 |
| C  | -0.1635530428 | -1.2001077752 | 0.0124177074  |
| C  | -1.140989874  | -2.0567199713 | 0.5391046882  |
| C  | 0.3806795036  | -1.4932874707 | -1.244746496  |
| C  | -1.5733078222 | -3.1723083248 | -0.1833456061 |
| H  | -1.5732683036 | -1.862495994  | 1.5180075628  |
| C  | -0.0602816357 | -2.6051592118 | -1.9724909762 |
| H  | 1.1615635527  | -0.8656966176 | -1.6701436501 |
| C  | -1.0378971292 | -3.4482525641 | -1.4437583679 |
| H  | -2.3311086746 | -3.8266098064 | 0.2418498736  |

|   |               |               |               |
|---|---------------|---------------|---------------|
| H | 0.3709573723  | -2.8138711513 | -2.9490787568 |
| H | -1.3756024381 | -4.3157272123 | -2.0046962756 |
| C | 3.463816421   | -0.0157429538 | 0.391239186   |
| H | 4.447009012   | -0.2195131609 | 0.8233563299  |
| H | 3.2591271961  | -0.7717102523 | -0.3726887859 |
| H | 3.4801573257  | 0.9739975933  | -0.0732739632 |

37

**CP1** B3LYP/BSI Optimized geometry (charge = 0, triplet)

|    |          |          |          |
|----|----------|----------|----------|
| Ni | -0.52534 | -0.92208 | -0.10411 |
| C  | 1.45937  | -1.29247 | 0.67903  |
| C  | 1.51081  | -1.1342  | -0.68642 |
| C  | 1.9365   | 0.07601  | -1.49438 |
| C  | 3.46454  | 0.1905   | -1.67144 |
| C  | 4.30728  | 0.40695  | -0.43978 |
| C  | 3.96339  | 0.72993  | 0.81339  |
| C  | 2.59025  | 0.9564   | 1.41342  |
| C  | 1.86658  | -0.3515  | 1.79527  |
| H  | 1.29571  | -2.31447 | 1.02508  |
| H  | 1.42574  | -2.0542  | -1.26999 |
| H  | 1.52973  | 0.99691  | -1.07601 |
| H  | 1.49158  | -0.01479 | -2.49243 |
| H  | 3.83074  | -0.71546 | -2.17715 |
| H  | 3.66335  | 1.00961  | -2.38002 |
| H  | 5.37486  | 0.28295  | -0.62963 |
| H  | 4.78398  | 0.8175   | 1.5255   |
| H  | 1.94921  | 1.56615  | 0.7726   |
| H  | 2.71387  | 1.53491  | 2.33684  |
| H  | 2.52854  | -0.93134 | 2.45454  |
| H  | 0.99031  | -0.11232 | 2.41471  |
| S  | -2.00532 | -2.46807 | -0.36724 |
| C  | -1.37129 | 0.79475  | -0.08376 |
| C  | -2.04342 | 1.29071  | -1.21608 |
| C  | -1.30998 | 1.62863  | 1.04831  |
| C  | -2.60671 | 2.56939  | -1.22823 |
| H  | -2.14212 | 0.6678   | -2.10267 |
| C  | -1.87616 | 2.90797  | 1.04646  |
| H  | -0.82288 | 1.28564  | 1.9607   |
| C  | -2.52018 | 3.38447  | -0.09658 |
| H  | -3.11831 | 2.92782  | -2.11914 |
| H  | -1.81388 | 3.53053  | 1.93716  |
| H  | -2.95989 | 4.37879  | -0.1024  |
| C  | -3.26177 | -2.28637 | 0.9613   |
| H  | -3.65986 | -1.26888 | 0.97413  |
| H  | -4.07818 | -2.98309 | 0.75211  |
| H  | -2.84303 | -2.52363 | 1.9438   |

37

**5B<sup>3</sup>** B3LYP/BSI Optimized geometry (charge = 0, triplet)

|    |               |               |               |
|----|---------------|---------------|---------------|
| Ni | -0.6496375895 | -0.8514718261 | 0.4368506582  |
| C  | 1.4909348508  | -1.3001084073 | 0.8327838443  |
| C  | 1.3887562063  | -1.1547795714 | -0.5207803372 |
| C  | 1.7079958528  | 0.0435124448  | -1.38633393   |
| C  | 3.2110887634  | 0.1530287596  | -1.7171168884 |
| C  | 4.168363167   | 0.3959970952  | -0.5767525624 |
| C  | 3.946907372   | 0.7412747307  | 0.6981171264  |
| C  | 2.6368534115  | 0.984166149   | 1.4192365892  |

|   |               |               |               |
|---|---------------|---------------|---------------|
| C | 1.9454070368  | -0.3123664794 | 1.8888442068  |
| H | 1.3551608574  | -2.3133470778 | 1.2117870948  |
| H | 1.1994962901  | -2.0742886137 | -1.0751199003 |
| H | 1.3419305049  | 0.9695092459  | -0.9445496564 |
| H | 1.1611317511  | -0.0685634596 | -2.3294325788 |
| H | 3.5289201921  | -0.7644098959 | -2.2343630525 |
| H | 3.3385127915  | 0.955358248   | -2.4604662265 |
| H | 5.212883006   | 0.270494338   | -0.8661110706 |
| H | 4.8312604117  | 0.8420023771  | 1.327595198   |
| H | 1.9409966627  | 1.5847659669  | 0.82953733    |
| H | 2.845189961   | 1.5775685756  | 2.3175830594  |
| H | 2.6368245651  | -0.8631418505 | 2.5419899992  |
| H | 1.0966924939  | -0.0508866539 | 2.5412637556  |
| S | -1.5625680099 | -2.7403018976 | -0.172985647  |
| C | -1.294355772  | 0.9502204721  | 0.1701191597  |
| C | -1.9263998211 | 1.3381966616  | -1.0277553593 |
| C | -1.2131824374 | 1.9266709233  | 1.184644071   |
| C | -2.4471096282 | 2.6220773692  | -1.2081735598 |
| H | -2.0219214644 | 0.6199649351  | -1.840740646  |
| C | -1.7273878734 | 3.2168423595  | 1.0157335267  |
| H | -0.7404598272 | 1.6904231601  | 2.1389374139  |
| C | -2.3465919916 | 3.5677134235  | -0.1846859897 |
| H | -2.9306778629 | 2.8868531365  | -2.1461848168 |
| H | -1.6469926213 | 3.9449417337  | 1.8203189111  |
| H | -2.7488409233 | 4.5686327387  | -0.3213914457 |
| C | -3.2409804082 | -2.6972210883 | 0.5810435353  |
| H | -3.7517895167 | -1.7613427037 | 0.336924626   |
| H | -3.8207657957 | -3.5267936721 | 0.1681608881  |
| H | -3.1976526058 | -2.8097606466 | 1.6683576735  |

33

**5A<sup>3</sup>** B3LYP/BSI Optimized geometry (charge = 0, triplet)

|    |               |               |               |
|----|---------------|---------------|---------------|
| Ni | 0.9916075206  | -0.6850422567 | 0.7271556838  |
| S  | 0.3854087235  | 0.2519344537  | 2.5942299108  |
| C  | 2.7490580349  | -0.5111128956 | -0.0546813992 |
| C  | 2.9796227363  | 0.0560008605  | -1.3233191253 |
| C  | 3.8808481523  | -0.9762909211 | 0.6428328984  |
| C  | 4.2603030523  | 0.134830735   | -1.8795027863 |
| H  | 2.1466370192  | 0.4631507132  | -1.8987158849 |
| C  | 5.1670711183  | -0.9065397265 | 0.0981684751  |
| H  | 3.7635295024  | -1.4000286549 | 1.6397889122  |
| C  | 5.3596871066  | -0.3509976689 | -1.1682181499 |
| H  | 4.4020791887  | 0.5803818072  | -2.8621753005 |
| H  | 6.0187927213  | -1.2801386532 | 0.6630034099  |
| H  | 6.3581100384  | -0.2909765289 | -1.594824275  |
| C  | 1.4088703206  | 1.7787548435  | 2.6997366504  |
| H  | 0.9736220571  | 2.5723369687  | 2.0860313641  |
| H  | 1.4216712918  | 2.1070452394  | 3.7421437293  |
| H  | 2.4321956058  | 1.5884011562  | 2.3691263957  |
| S  | -0.5249325284 | -1.0036572355 | -1.1010195805 |
| C  | -2.0327445517 | -1.7434638238 | -0.4575402091 |
| C  | 0.2045048653  | -2.4043670934 | -2.0357206438 |
| C  | -3.1819632587 | -1.7537297414 | -1.2570208426 |
| C  | -2.0700276445 | -2.2701061816 | 0.8381070136  |
| H  | 0.2827533165  | -3.2920249114 | -1.404377868  |
| H  | -0.4103549343 | -2.6179684381 | -2.9122711447 |
| H  | 1.2022274845  | -2.0831901346 | -2.3439591284 |
| C  | -4.3609578827 | -2.3134129582 | -0.763478396  |

|   |               |               |               |
|---|---------------|---------------|---------------|
| H | -3.1529782015 | -1.3220359894 | -2.2531075236 |
| C | -3.2546334861 | -2.8209481596 | 1.3278592611  |
| H | -1.1825889351 | -2.2403271025 | 1.4633948219  |
| C | -4.3980678981 | -2.8465552328 | 0.5271777838  |
| H | -5.2524112213 | -2.323605131  | -1.3842414856 |
| H | -3.2818446779 | -3.2231060173 | 2.3362723065  |
| H | -5.3198246361 | -3.2742993208 | 0.9111981269  |

47

**TS<sup>3</sup><sub>5A-18A</sub>** B3LYP/BSI Optimized geometry (charge = 0, triplet)

|    |               |               |               |
|----|---------------|---------------|---------------|
| Ni | 0.9215694375  | 0.1913910148  | 0.3810879908  |
| S  | 0.4164359526  | 1.8435897556  | 1.6981752536  |
| C  | 2.7652927823  | -0.0393474646 | -0.1763987621 |
| C  | 3.1315464633  | -0.0991780496 | -1.5349114579 |
| C  | 3.8028025967  | -0.183509108  | 0.7631335617  |
| C  | 4.4572804769  | -0.2963211687 | -1.9369485548 |
| H  | 2.3732723456  | 0.0155111857  | -2.3108219666 |
| C  | 5.1319425362  | -0.3850706904 | 0.3750271057  |
| H  | 3.5773116297  | -0.1389069432 | 1.8287749925  |
| C  | 5.4636241502  | -0.4414294133 | -0.9798425594 |
| H  | 4.7043923858  | -0.3336821975 | -2.9961626575 |
| H  | 5.9081856922  | -0.4952790768 | 1.1297633673  |
| H  | 6.4954071699  | -0.5942283759 | -1.2870760474 |
| C  | 1.9082161553  | 2.9107665807  | 1.858781945   |
| H  | 1.7863244197  | 3.7990083375  | 1.233183085   |
| H  | 2.0014341     | 3.2216183297  | 2.9023719693  |
| H  | 2.8105490176  | 2.3781964712  | 1.5526565881  |
| H  | -1.8123258848 | 0.8156566564  | -1.4406165344 |
| Si | -2.7164225804 | 2.0054563241  | -1.3255446782 |
| C  | -3.4139887611 | 2.0623742892  | 0.4297849888  |
| H  | -4.1201137872 | 2.8938788978  | 0.5481652968  |
| H  | -3.9428947123 | 1.1362299623  | 0.6845819626  |
| C  | -1.698817563  | 3.55533977    | -1.6939334037 |
| H  | -0.884789807  | 3.6547062024  | -0.9666873809 |
| H  | -2.3155065685 | 4.4607128883  | -1.6331916747 |
| C  | -4.1043960725 | 1.7899875887  | -2.5985328135 |
| H  | -4.8016673084 | 2.636648105   | -2.5705193    |
| H  | -3.7055379502 | 1.7231605088  | -3.6178228746 |
| H  | -2.6040098653 | 2.2033261548  | 1.1548790155  |
| H  | -1.2566814464 | 3.5205392237  | -2.6968319222 |
| H  | -4.6831980379 | 0.8783789587  | -2.4073233293 |
| S  | -0.1804342832 | -1.7034774677 | -0.7649687173 |
| C  | -1.6239179852 | -2.1137367062 | 0.2278013612  |
| C  | 0.9530534788  | -3.0953292161 | -0.3776236925 |
| C  | -2.6127817619 | -2.946614442  | -0.309319877  |
| C  | -1.7725847862 | -1.5794066803 | 1.5128738029  |
| H  | 1.0565260937  | -3.2216739756 | 0.7020020144  |
| H  | 0.5730672761  | -4.012253359  | -0.8324268909 |
| H  | 1.9205319331  | -2.8291369258 | -0.8090388853 |
| C  | -3.7407637485 | -3.2578094369 | 0.4512144455  |
| H  | -2.500918593  | -3.34083452   | -1.314952869  |
| C  | -2.9059661997 | -1.8907104586 | 2.2651611263  |
| H  | -1.0117678931 | -0.9177159724 | 1.9185276913  |
| C  | -3.8877756095 | -2.7315496441 | 1.7369508152  |
| H  | -4.5076653848 | -3.9054752934 | 0.0356822927  |
| H  | -3.0198559961 | -1.4710286229 | 3.2603536377  |
| H  | -4.7699125069 | -2.9715199961 | 2.3238415393  |

31

**18A<sup>3</sup>** B3LYP/BSI Optimized geometry (charge = 0, triplet)

|    |               |               |               |
|----|---------------|---------------|---------------|
| Ni | -1.3097295685 | -0.3394797148 | -0.8321805933 |
| S  | -1.2411565126 | -2.3498902754 | -1.6740790478 |
| C  | -2.2735966382 | 1.232036892   | -0.2800116378 |
| C  | -1.9420600749 | -2.1934028738 | -3.3710896783 |
| C  | -1.7327679403 | 2.1456591535  | 0.6468760645  |
| C  | -3.5227815667 | 1.5674215166  | -0.8376328618 |
| H  | -2.9856597991 | -1.867218877  | -3.3343253194 |
| H  | -1.3685080671 | -1.4937028638 | -3.9852790156 |
| H  | -1.9060385298 | -3.1794896746 | -3.840164628  |
| C  | -2.3875528358 | 3.3341674556  | 0.9864832031  |
| H  | -0.7705503208 | 1.9387161439  | 1.1154462369  |
| C  | -4.1915325372 | 2.7475055737  | -0.5023948518 |
| H  | -3.9990828826 | 0.8913255611  | -1.5475583209 |
| C  | -3.6228971755 | 3.6369422687  | 0.4123219258  |
| H  | -1.9360843769 | 4.0197290404  | 1.7006253303  |
| H  | -5.1566285983 | 2.9728613959  | -0.9511523508 |
| H  | -4.1404043634 | 4.5556344934  | 0.677615301   |
| Si | -0.7612160916 | -1.4972274341 | 2.0371074402  |
| H  | -0.4472711662 | -0.7461622185 | 0.733957316   |
| C  | -2.6271177136 | -1.6850362744 | 2.1751295347  |
| C  | 0.1172473355  | -3.1522609549 | 1.8717302413  |
| C  | -0.0535126708 | -0.4084947673 | 3.4038312652  |
| H  | -2.8899996344 | -2.144121995  | 3.1366373169  |
| H  | -3.130054944  | -0.7143581898 | 2.112243429   |
| H  | -3.0186421352 | -2.3260807533 | 1.3778151507  |
| H  | -0.2378429202 | -3.6817476676 | 0.9806072817  |
| H  | -0.0743905206 | -3.7875406817 | 2.7454937838  |
| H  | 1.2020359808  | -3.0266876257 | 1.7803242723  |
| H  | -0.2017886931 | -0.8766150307 | 4.3850728272  |
| H  | 1.0221410561  | -0.2445686173 | 3.273076548   |
| H  | -0.547665095  | 0.569159995   | 3.4225998369  |

51

**TS<sup>3</sup><sub>18A-18B</sub>** B3LYP/BSI Optimized geometry (charge = 0, triplet)\*

|    |           |           |           |
|----|-----------|-----------|-----------|
| Ni | -0.295539 | -0.082819 | 0.641722  |
| S  | -0.147465 | 1.205659  | 2.436052  |
| C  | -1.734798 | -1.246951 | 0.056816  |
| C  | 0.065662  | 0.05229   | 3.853307  |
| C  | -1.749297 | -1.955581 | -1.160662 |
| C  | -2.854134 | -1.426224 | 0.893312  |
| H  | 0.185212  | 0.647186  | 4.762738  |
| H  | -0.815434 | -0.585306 | 3.974415  |
| H  | 0.949843  | -0.584348 | 3.741298  |
| C  | -2.807812 | -2.796024 | -1.524202 |
| H  | -0.919167 | -1.857225 | -1.861681 |
| C  | -3.917084 | -2.266641 | 0.54683   |
| H  | -2.906018 | -0.891506 | 1.841026  |
| C  | -3.896895 | -2.956893 | -0.666574 |
| H  | -2.780491 | -3.325047 | -2.474906 |
| H  | -4.762295 | -2.380718 | 1.222648  |
| H  | -4.721309 | -3.61022  | -0.94195  |
| Si | -1.465449 | 2.369781  | -1.092347 |
| H  | -0.433599 | 1.423067  | -0.47613  |
| C  | -2.966171 | 2.440232  | 0.035456  |
| C  | -0.58268  | 4.033245  | -1.214043 |

|   |           |           |           |
|---|-----------|-----------|-----------|
| C | -1.880677 | 1.647124  | -2.782781 |
| H | -3.704544 | 3.152042  | -0.355183 |
| H | -3.444737 | 1.458227  | 0.110528  |
| H | -2.682646 | 2.755563  | 1.045233  |
| H | -0.279696 | 4.386722  | -0.222079 |
| H | -1.241975 | 4.792234  | -1.653506 |
| H | 0.315292  | 3.969781  | -1.839397 |
| H | -2.635728 | 2.259044  | -3.291946 |
| H | -0.999658 | 1.59915   | -3.433634 |
| H | -2.283892 | 0.634008  | -2.676796 |
| C | 2.233122  | -1.267395 | 0.827628  |
| C | 1.735239  | -1.318432 | -0.425947 |
| C | 3.241006  | -0.335168 | 1.450459  |
| H | 1.869695  | -2.036023 | 1.513011  |
| C | 2.090112  | -0.453029 | -1.617598 |
| H | 1.076734  | -2.157841 | -0.647616 |
| C | 4.141823  | 0.490258  | 0.506363  |
| H | 3.881921  | -0.94823  | 2.099902  |
| H | 2.705487  | 0.353236  | 2.121469  |
| C | 3.364165  | -0.924284 | -2.352636 |
| H | 2.186767  | 0.597628  | -1.336238 |
| H | 1.261156  | -0.495183 | -2.335326 |
| C | 4.994116  | -0.348751 | -0.422574 |
| H | 3.539012  | 1.216971  | -0.04387  |
| H | 4.806915  | 1.088577  | 1.140554  |
| C | 4.664394  | -0.924455 | -1.58573  |
| H | 3.193017  | -1.94646  | -2.72094  |
| H | 3.486173  | -0.312223 | -3.260437 |
| H | 6.012656  | -0.519793 | -0.073246 |
| H | 5.451564  | -1.491756 | -2.08469  |

51

**TS<sup>3</sup><sub>18B-23A</sub>** B3LYP/BSI Optimized geometry (charge = 0, triplet)

|    |               |               |               |
|----|---------------|---------------|---------------|
| Ni | -0.2829335131 | -0.0699945751 | 0.7375288448  |
| S  | 0.5013259146  | 0.8447750537  | 2.5681313294  |
| C  | -1.6973019416 | -1.2235248316 | 0.1083040852  |
| C  | 1.1225923408  | -0.5304933589 | 3.623930493   |
| C  | -1.8963949705 | -1.501127835  | -1.2591708756 |
| C  | -2.5695831262 | -1.8556647725 | 1.0147512357  |
| H  | 1.5586521562  | -0.0884337408 | 4.5231837382  |
| H  | 0.304266153   | -1.1906903849 | 3.9258791953  |
| H  | 1.8919385221  | -1.1198466119 | 3.1174130825  |
| C  | -2.900677794  | -2.3703424093 | -1.6987272438 |
| H  | -1.2523707453 | -1.0365379251 | -2.0048458593 |
| C  | -3.5774545927 | -2.7259274783 | 0.5877615773  |
| H  | -2.4719496195 | -1.6646277672 | 2.0830509154  |
| C  | -3.745320112  | -2.9863996987 | -0.7736012958 |
| H  | -3.0237768137 | -2.5652139286 | -2.7622001241 |
| H  | -4.2332753557 | -3.1979263975 | 1.3163355655  |
| H  | -4.52894028   | -3.6606894507 | -1.1105476427 |
| Si | -1.7316212246 | 2.5669715681  | -0.1950681173 |
| H  | -0.6153541907 | 1.5215627135  | -0.0868123474 |
| C  | -2.9802593692 | 2.2447642668  | 1.1724906018  |
| C  | -0.8512292743 | 4.2196939076  | 0.0154071904  |
| C  | -2.4710716652 | 2.3332452033  | -1.9108760744 |
| H  | -3.7928061383 | 2.9808997779  | 1.1245655028  |
| H  | -3.4201374745 | 1.2463632476  | 1.0779566376  |
| H  | -2.5110728401 | 2.3189462787  | 2.1595664099  |



|   |               |               |               |
|---|---------------|---------------|---------------|
| H | -0.3511176055 | 4.2688871523  | 0.9891005392  |
| H | -1.5637371274 | 5.0521823009  | -0.0400988553 |
| H | -0.0944037763 | 4.375394534   | -0.7618104097 |
| H | -3.2911875294 | 3.0421530242  | -2.0800848429 |
| H | -1.7253393258 | 2.4922056179  | -2.6981449289 |
| H | -2.8722124039 | 1.3198524633  | -2.0206966825 |
| C | 1.7275645429  | -1.0532094186 | -2.0754839195 |
| C | 1.9151151528  | 0.2757421753  | -2.0776093399 |
| C | 2.0781237981  | -2.1084181504 | -1.0556923881 |
| H | 1.2361139121  | -1.4673865976 | -2.9574800299 |
| C | 2.573447639   | 1.1681533889  | -1.0437843759 |
| H | 1.5751047546  | 0.7987318952  | -2.9723771177 |
| C | 2.9493155983  | -1.6861090422 | 0.1450286831  |
| H | 2.5820675363  | -2.9299526986 | -1.5859238685 |
| H | 1.1390921762  | -2.5471188307 | -0.6817509663 |
| C | 4.1155039466  | 1.146333162   | -1.0710060084 |
| H | 2.2153567043  | 0.9551458498  | -0.0331944331 |
| H | 2.2622307734  | 2.201261125   | -1.2434121168 |
| C | 4.3618568392  | -1.2951529471 | -0.2331889713 |
| H | 2.4418108942  | -0.8940475804 | 0.7048495911  |
| H | 3.0023572699  | -2.5428276283 | 0.8284137902  |
| C | 4.8217949894  | -0.1434772941 | -0.7374146644 |
| H | 4.4522764366  | 1.4613569092  | -2.0703133411 |
| H | 4.4826815501  | 1.9282167744  | -0.3873896442 |
| H | 5.0982026118  | -2.088057173  | -0.0986174523 |
| H | 5.892447597   | -0.104701863  | -0.9461200713 |

39

**23A<sup>3</sup>** B3LYP/BSI Optimized geometry (charge = 0, triplet)

|    |               |               |               |
|----|---------------|---------------|---------------|
| Ni | -0.3758198778 | -0.0639787782 | 0.7794734628  |
| S  | 0.6039835916  | 1.0857053375  | 2.3522439883  |
| C  | -1.7268083082 | -1.2934285174 | 0.1737317819  |
| C  | 1.205366448   | -0.1617585497 | 3.5678436324  |
| C  | -2.1255465832 | -1.349756013  | -1.176892518  |
| C  | -2.3140485331 | -2.2339104463 | 1.042346414   |
| H  | 1.7248118617  | 0.3728721713  | 4.3666142769  |
| H  | 0.3692159244  | -0.7124106637 | 4.0088389064  |
| H  | 1.9019826068  | -0.8709189686 | 3.1122302268  |
| C  | -3.0420313178 | -2.2988352019 | -1.6415676069 |
| H  | -1.7087187647 | -0.6447340058 | -1.8962234999 |
| C  | -3.2360881355 | -3.1829580668 | 0.5935932314  |
| H  | -2.0576504498 | -2.2281061383 | 2.1016813692  |
| C  | -3.6022507148 | -3.218436206  | -0.7539244353 |
| H  | -3.320868493  | -2.3173230198 | -2.6931026863 |
| H  | -3.6715573067 | -3.8926967363 | 1.2937477047  |
| H  | -4.3207355632 | -3.9539731179 | -1.1074138589 |
| Si | -1.6896351232 | 2.5577767274  | -0.3495208316 |
| H  | -0.7283274807 | 1.3594522624  | -0.3214757919 |
| C  | -3.0914729007 | 2.2184737087  | 0.8569742222  |
| C  | -0.6440223777 | 4.03562675    | 0.1612497995  |
| C  | -2.2937088338 | 2.6500298126  | -2.1329925389 |
| H  | -3.8409828787 | 3.0179903785  | 0.7987810665  |
| H  | -3.5882779917 | 1.2688242962  | 0.6323251671  |
| H  | -2.7229042434 | 2.176941028   | 1.8876837444  |
| H  | -0.2061847228 | 3.8652297722  | 1.1511018388  |
| H  | -1.2509048144 | 4.9484196334  | 0.208741864   |
| H  | 0.1751629008  | 4.2143175528  | -0.5443700087 |
| H  | -2.9713043531 | 3.5026408677  | -2.2666660974 |

|   |               |              |               |
|---|---------------|--------------|---------------|
| H | -1.4614326729 | 2.7738022826 | -2.835127127  |
| H | -2.8411978925 | 1.7422608484 | -2.4096586965 |

31

**23B<sup>3</sup>** B3LYP/BSI Optimized geometry (charge = 0, triplet)

|    |               |               |               |
|----|---------------|---------------|---------------|
| Ni | -0.0036978515 | 0.9376419274  | -0.0524285339 |
| S  | -0.9802826285 | 2.8458211869  | 0.3928568042  |
| C  | 1.6589149046  | -0.0355355748 | -0.068975032  |
| C  | -0.8696075853 | 3.8179002282  | -1.1699932086 |
| C  | 1.9005369045  | -1.09859235   | -0.9593575351 |
| C  | 2.7005381922  | 0.2965157949  | 0.8165402859  |
| H  | 0.1726658678  | 4.0092439071  | -1.4399270313 |
| H  | -1.3692824591 | 3.3099093123  | -2.0001611224 |
| H  | -1.3641362575 | 4.7773673272  | -1.0022347703 |
| C  | 3.1115550855  | -1.7996556183 | -0.9648077338 |
| H  | 1.1322966398  | -1.397442817  | -1.6728206547 |
| C  | 3.9128905172  | -0.3993955944 | 0.8259993346  |
| H  | 2.5733018001  | 1.119421397   | 1.519307433   |
| C  | 4.1219693213  | -1.4519005272 | -0.0675879194 |
| H  | 3.2647184459  | -2.6149382643 | -1.6689547697 |
| H  | 4.6953912226  | -0.1186027555 | 1.5277563136  |
| H  | 5.0642547544  | -1.9944230177 | -0.065448546  |
| Si | -2.0040014991 | -1.4093960184 | 0.0516850274  |
| H  | -1.1211290988 | -0.5145298122 | -0.8092622002 |
| C  | -1.5994769187 | -1.0200162297 | 1.8558227787  |
| C  | -3.7826591222 | -0.9538014817 | -0.3651099231 |
| C  | -1.5522960217 | -3.1844377378 | -0.386139449  |
| H  | -2.1604269092 | -1.6935591816 | 2.5159838164  |
| H  | -0.5349315907 | -1.1618692006 | 2.0765401038  |
| H  | -1.8811695618 | 0.0039162311  | 2.1304922833  |
| H  | -3.9659844313 | 0.1070233454  | -0.1602491374 |
| H  | -4.4905289135 | -1.538905428  | 0.2347713521  |
| H  | -4.0093016301 | -1.138686164  | -1.421319847  |
| H  | -2.1195106857 | -3.8961182977 | 0.2262592685  |
| H  | -1.7651591749 | -3.4057986991 | -1.4381645611 |
| H  | -0.4857043164 | -3.3645938875 | -0.2118328262 |

31

**CP2** B3LYP/BSI Optimized geometry (charge = 0, triplet)

|    |          |          |          |
|----|----------|----------|----------|
| Ni | -0.22692 | 0.69893  | -0.11253 |
| S  | -0.82781 | 2.69817  | 0.43687  |
| C  | 1.50534  | -0.08837 | -0.07766 |
| C  | -0.55159 | 3.7548   | -1.04732 |
| C  | 1.84066  | -1.23309 | -0.82162 |
| C  | 2.52438  | 0.50365  | 0.68938  |
| H  | 0.51709  | 3.83463  | -1.26518 |
| H  | -1.07012 | 3.36872  | -1.92946 |
| H  | -0.93671 | 4.75377  | -0.82604 |
| C  | 3.13357  | -1.76845 | -0.80143 |
| H  | 1.08997  | -1.72454 | -1.43953 |
| C  | 3.81772  | -0.02557 | 0.71808  |
| H  | 2.3092   | 1.3941   | 1.27593  |
| C  | 4.12583  | -1.16471 | -0.02896 |
| H  | 3.36278  | -2.65577 | -1.38813 |
| H  | 4.58687  | 0.4537   | 1.3201   |
| H  | 5.13143  | -1.57698 | -0.0101  |
| Si | -2.0178  | -1.50232 | 0.02677  |

|   |          |          |          |
|---|----------|----------|----------|
| H | -1.01232 | -0.72554 | -0.83673 |
| C | -1.65603 | -1.16715 | 1.8491   |
| C | -3.71308 | -0.87125 | -0.48896 |
| C | -1.72167 | -3.30907 | -0.41304 |
| H | -2.29406 | -1.80667 | 2.47317  |
| H | -0.61449 | -1.39199 | 2.10336  |
| H | -1.86379 | -0.12966 | 2.13525  |
| H | -3.82903 | 0.19214  | -0.2516  |
| H | -4.50893 | -1.42034 | 0.0292   |
| H | -3.86869 | -0.99511 | -1.56663 |
| H | -2.4299  | -3.95916 | 0.1157   |
| H | -1.84359 | -3.48822 | -1.48718 |
| H | -0.70858 | -3.61609 | -0.1316  |

31

**TS<sub>23B-18B</sub>** B3LYP/BSI Optimized geometry (charge = 0, singlet)

|    |               |               |               |
|----|---------------|---------------|---------------|
| Ni | -1.1200828918 | -0.9582522993 | 0.3225787428  |
| S  | 0.5224722112  | -0.4725102845 | 1.5502396719  |
| H  | -2.3727201959 | -0.8511105045 | -0.4274208825 |
| Si | -2.2718867676 | 0.9212718373  | -0.3489377008 |
| C  | -0.9204498064 | 1.9129667239  | -1.2283401258 |
| H  | -0.5550556985 | 1.3894855177  | -2.1193127587 |
| H  | -1.3403224315 | 2.8718921222  | -1.5618939663 |
| C  | -3.7611195801 | 0.860849226   | -1.5248640487 |
| H  | -4.6030432016 | 0.3046204349  | -1.0970571942 |
| H  | -4.108728716  | 1.8797667747  | -1.7412661451 |
| C  | -2.825220519  | 1.689226954   | 1.2866523723  |
| H  | -3.2975512491 | 2.6616311168  | 1.0915017796  |
| H  | -3.5674214464 | 1.0580298321  | 1.7886769326  |
| H  | -0.0676561019 | 2.1185456108  | -0.5751491709 |
| H  | -1.985155476  | 1.8389346338  | 1.9708399553  |
| H  | -3.5024000227 | 0.3883919598  | -2.4797702622 |
| C  | -1.9421484791 | -2.4859265441 | -0.3923488171 |
| C  | -2.7242343616 | -3.2959497621 | 0.4442803248  |
| C  | -1.5569532874 | -2.9713959298 | -1.6504498888 |
| C  | -3.0585753567 | -4.5946427035 | 0.0528257508  |
| H  | -3.0654672613 | -2.9254412749 | 1.4079016399  |
| C  | -1.8929651164 | -4.2714292464 | -2.0370578339 |
| H  | -0.9859969552 | -2.3439864781 | -2.3313718686 |
| C  | -2.6416239064 | -5.086963793  | -1.1859724372 |
| H  | -3.648293951  | -5.2210586745 | 0.7177402374  |
| H  | -1.5722495718 | -4.6442085577 | -3.0068751793 |
| H  | -2.9088221965 | -6.0951118546 | -1.4909754905 |
| C  | 1.9875511306  | -0.2450892278 | 0.4548240226  |
| H  | 2.8595998621  | -0.0607582037 | 1.0869992837  |
| H  | 2.1756073611  | -1.135077397  | -0.1506548337 |
| H  | 1.8505748931  | 0.6146222716  | -0.2075497493 |

31

**18B** B3LYP/BSI Optimized geometry (charge = 0, singlet)

|    |               |               |               |
|----|---------------|---------------|---------------|
| Ni | 0.2978383768  | -0.1424930561 | 0.3074943504  |
| S  | 0.0727435804  | -1.3294043562 | 2.0249642798  |
| C  | 0.4432708109  | 1.6506947725  | -0.6146298728 |
| C  | -1.6965210944 | -1.1258570235 | 2.5054944914  |
| C  | 1.3543145756  | 2.4810317088  | 0.0642109369  |
| C  | -0.7934318372 | 2.1658326764  | -1.0389158373 |
| H  | -1.820113648  | -1.5955372158 | 3.4854140584  |

|    |               |               |               |
|----|---------------|---------------|---------------|
| H  | -1.9848822319 | -0.0747048661 | 2.5848164687  |
| H  | -2.3585807553 | -1.6294874873 | 1.7959103528  |
| C  | 0.9903385976  | 3.7862681037  | 0.3885487885  |
| H  | 2.3323689934  | 2.1011713474  | 0.3444459837  |
| C  | -1.1490207423 | 3.4735017657  | -0.7098298285 |
| H  | -1.4696389019 | 1.5420460063  | -1.6154184756 |
| C  | -0.2612218201 | 4.2806738     | 0.0067748826  |
| H  | 1.6837643517  | 4.4224298255  | 0.931254737   |
| H  | -2.1137766613 | 3.866637437   | -1.0180457441 |
| H  | -0.5385656365 | 5.3011145805  | 0.2564364066  |
| Si | 0.0052101924  | -1.9109774385 | -0.9931115876 |
| H  | 0.8245461292  | 0.6987364411  | -1.0911734121 |
| C  | 0.0631241863  | -1.2740680554 | -2.8016976715 |
| C  | 1.3893010746  | -3.1999158983 | -0.8233672315 |
| C  | -1.685631943  | -2.7613713001 | -0.8209631121 |
| H  | -0.0718527301 | -2.1231942221 | -3.4864404283 |
| H  | -0.7348426647 | -0.5531618093 | -3.0189901104 |
| H  | 1.019188001   | -0.7993507956 | -3.0536991967 |
| H  | 1.2587769506  | -3.9963762837 | -1.5687482383 |
| H  | 1.3813898667  | -3.652118634  | 0.1731057134  |
| H  | 2.3785483485  | -2.7553927302 | -0.9852835452 |
| H  | -2.5130328959 | -2.0453555008 | -0.896693561  |
| H  | -1.8143189992 | -3.4955572483 | -1.6280027429 |
| H  | -1.777383474  | -3.2886475435 | 0.1339041456  |

31

TS<sub>23B-24</sub> B3LYP/BSI Optimized geometry (charge = 0, singlet)

|    |               |               |               |
|----|---------------|---------------|---------------|
| Ni | -1.1118177827 | 0.379967316   | -0.9572209626 |
| S  | -2.1762815943 | -1.5447101962 | -0.9843980675 |
| C  | 0.0574509849  | 1.7628259985  | -0.717072862  |
| C  | 0.1934384004  | 3.1309072035  | -0.9789162274 |
| C  | 1.0821375921  | 1.1111331404  | -0.0095380538 |
| C  | 1.3163668689  | 3.828653976   | -0.5260689535 |
| H  | -0.5773775029 | 3.6588111763  | -1.5339585423 |
| C  | 2.2072958643  | 1.8039772353  | 0.4490859804  |
| H  | 1.0211024781  | 0.0353451773  | 0.2002024564  |
| C  | 2.3223448896  | 3.1702923871  | 0.1884809915  |
| H  | 1.4087012485  | 4.8928521427  | -0.7315611181 |
| H  | 2.9873910654  | 1.2824299184  | 0.9989687237  |
| H  | 3.1934196374  | 3.7196718313  | 0.5360702239  |
| C  | -1.3198914118 | -2.5792089166 | 0.2867525577  |
| H  | -0.9067981646 | -1.9823667327 | 1.1035417966  |
| H  | -2.0327726749 | -3.2959761624 | 0.6987221887  |
| H  | -0.5079073775 | -3.1202026784 | -0.2043655019 |
| H  | -1.7018757254 | 1.2015214494  | -1.959395244  |
| Si | -3.2500617371 | 0.2706759987  | 0.2079416689  |
| C  | -4.7521392087 | 0.433065704   | -0.9251122867 |
| H  | -5.1859075146 | -0.5384884072 | -1.1798317361 |
| H  | -5.5199609556 | 1.0365484861  | -0.4239069089 |
| C  | -3.6122161308 | -0.7138475375 | 1.7898431185  |
| H  | -4.0210676768 | -1.7112056876 | 1.5999377204  |
| H  | -4.3389201334 | -0.1569970641 | 2.3955298891  |
| C  | -2.8696492593 | 2.0175561871  | 0.8845971832  |
| H  | -3.7278124409 | 2.3221480207  | 1.5034134406  |
| H  | -1.9750425036 | 2.0481274917  | 1.513757959   |
| H  | -4.4877711503 | 0.9433973364  | -1.8575868094 |
| H  | -2.7104381019 | -0.8257209346 | 2.404487379   |
| H  | -2.7372039824 | 2.7513041405  | 0.0861049967  |

31

**24** B3LYP/BSI Optimized geometry (charge = 0, singlet)

|    |               |               |               |
|----|---------------|---------------|---------------|
| Ni | 0.6552316524  | 0.1351697737  | 0.4953815862  |
| S  | -0.5763092422 | -1.7147581434 | 0.7937552269  |
| C  | 1.9072846027  | 1.3063310622  | -0.1400902787 |
| C  | 1.8385107081  | 2.649830477   | -0.5425797777 |
| C  | 3.1073679898  | 0.6135005031  | -0.3947419735 |
| C  | 2.9145226438  | 3.2698584567  | -1.1836909965 |
| H  | 0.934734587   | 3.223150777   | -0.3502530753 |
| C  | 4.1875282854  | 1.2254973529  | -1.0381369829 |
| H  | 3.2160797671  | -0.4294905984 | -0.086603586  |
| C  | 4.0923859047  | 2.5604645805  | -1.4353332464 |
| H  | 2.8350793644  | 4.311679667   | -1.488820226  |
| H  | 5.101707048   | 0.6646883554  | -1.2237124093 |
| H  | 4.9294453592  | 3.0457648962  | -1.931667473  |
| C  | -0.43931153   | -2.4653605965 | 2.4725471111  |
| H  | -0.6139181923 | -1.7215762154 | 3.2522958413  |
| H  | -1.1506857136 | -3.2888229823 | 2.5657062743  |
| H  | 0.5750471337  | -2.8573750049 | 2.5670488118  |
| H  | 0.1020156893  | 1.2126562133  | 1.2618926103  |
| Si | -2.6534950136 | -0.963618436  | 0.7046183407  |
| C  | -2.7468475609 | -0.0715206555 | -0.9479909543 |
| H  | -2.5369958614 | -0.7435157047 | -1.787473563  |
| H  | -3.7542610289 | 0.339502794   | -1.0918251986 |
| C  | -3.8128424626 | -2.451361746  | 0.7646052081  |
| H  | -3.6212351736 | -3.1394609521 | -0.0658082976 |
| H  | -4.8548268903 | -2.1143204915 | 0.6900136746  |
| C  | -2.9658254003 | 0.2057577656  | 2.1454176671  |
| H  | -3.9771521446 | 0.6262519801  | 2.071068013   |
| H  | -2.8923082952 | -0.2969996243 | 3.1165218636  |
| H  | -2.0324134959 | 0.7571140333  | -0.987202306  |
| H  | -3.7179927794 | -3.0133702693 | 1.700802231   |
| H  | -2.2473589509 | 1.0312047325  | 2.1316948848  |

37

**5C<sup>3</sup>** B3LYP/BSI Optimized geometry (charge = 0, triplet)

|    |               |               |               |
|----|---------------|---------------|---------------|
| Ni | -0.251556754  | 0.5381726996  | 0.4665322916  |
| S  | 0.37169643    | -0.0049472007 | 2.4770704022  |
| C  | -0.3018710969 | 1.2541862272  | 3.632255701   |
| H  | -1.3658607839 | 1.0793280056  | 3.8159734873  |
| H  | 0.2362018175  | 1.166695947   | 4.5796235861  |
| H  | -0.167142477  | 2.2596770501  | 3.228055466   |
| C  | -3.984351834  | -2.4319232491 | -1.4608661052 |
| C  | -3.9959364128 | -1.3674335319 | -2.2733296278 |
| C  | -3.4950136749 | -2.5855766396 | -0.0414939725 |
| H  | -4.3990266261 | -3.3545293431 | -1.8697724781 |
| C  | -3.500054291  | 0.0418000751  | -2.0223329712 |
| H  | -4.3978419087 | -1.5310806399 | -3.2734645939 |
| C  | -2.610030327  | -1.4653843582 | 0.5443068614  |
| H  | -2.9442033969 | -3.5355275885 | 0.0230327696  |
| H  | -4.3636935085 | -2.7177640281 | 0.6223141288  |
| C  | -1.9806044635 | 0.2150440817  | -2.2308987482 |
| H  | -3.7907604501 | 0.4043298438  | -1.0329849054 |
| H  | -3.9960714194 | 0.7127108952  | -2.7338826729 |
| C  | -1.3061727898 | -1.3015564507 | -0.2052804349 |
| H  | -3.1685994215 | -0.5289532115 | 0.5902600896  |

|   |               |               |               |
|---|---------------|---------------|---------------|
| H | -2.3684573575 | -1.7219774231 | 1.5811287467  |
| C | -1.0506972406 | -0.5774618271 | -1.3361784694 |
| H | -1.7387315495 | -0.0890040487 | -3.2592343131 |
| H | -1.724557419  | 1.2804246794  | -2.1715216469 |
| H | -0.5153154127 | -1.9798498058 | 0.1221105776  |
| H | -0.0640916705 | -0.7335277279 | -1.7801658274 |
| C | -0.4749872328 | 2.4402092928  | 0.230988278   |
| C | 0.6526974194  | 3.2797750664  | 0.325904345   |
| C | -1.7088776301 | 3.0650259723  | -0.0300399239 |
| C | 0.5616543532  | 4.6623800999  | 0.1362283808  |
| H | 1.6264172569  | 2.8520135837  | 0.5607456694  |
| C | -1.8150709322 | 4.4470670648  | -0.2126825532 |
| H | -2.6207463782 | 2.4700680006  | -0.0881713304 |
| C | -0.6752493807 | 5.2504542388  | -0.13479091   |
| H | 1.4539646455  | 5.2808057209  | 0.2080535502  |
| H | -2.785336341  | 4.8974327813  | -0.4121542896 |
| H | -0.7521947417 | 6.3257687478  | -0.2762775573 |

53

**TS<sup>3</sup><sub>SC-9A</sub>** B3LYP/BSI Optimized geometry (charge = 0, triplet)

|    |               |               |               |
|----|---------------|---------------|---------------|
| Ni | -0.2790890104 | 0.2497842637  | 0.5971808853  |
| S  | 0.1786475433  | -0.1473558393 | 2.7005879311  |
| C  | -0.3507103986 | 1.3119962025  | 3.6824771809  |
| H  | -1.4301235152 | 1.2862830707  | 3.8562339832  |
| H  | 0.1603075153  | 1.27497251    | 4.6480833359  |
| H  | -0.0918596872 | 2.2394352903  | 3.1675589484  |
| S  | 2.055339713   | -3.0225121941 | 0.2235166338  |
| C  | 2.9433587154  | -1.6335484055 | -0.4676633091 |
| C  | 2.5380118614  | -3.0096866373 | 1.9866226741  |
| C  | 3.119988719   | -1.6225753479 | -1.8615299983 |
| C  | 3.4334645887  | -0.5641050101 | 0.2953835864  |
| H  | 3.6266869061  | -2.9919351175 | 2.0840803802  |
| H  | 2.0841389272  | -2.1744121965 | 2.5256509372  |
| H  | 2.158101951   | -3.9475369711 | 2.4005699251  |
| C  | 3.7731531138  | -0.5572769782 | -2.4792479293 |
| H  | 2.7597068274  | -2.458096592  | -2.4563411152 |
| C  | 4.1036043711  | 0.4895806265  | -0.3331987973 |
| H  | 3.2891070776  | -0.5392084437 | 1.3698505426  |
| C  | 4.2735425945  | 0.502267154   | -1.7181806278 |
| H  | 3.90394074    | -0.5640730518 | -3.5581793035 |
| H  | 4.4884767238  | 1.3069613469  | 0.2711309809  |
| H  | 4.791464638   | 1.326644216   | -2.1997055087 |
| C  | -4.3595711759 | -2.3539163619 | -1.2069813829 |
| C  | -4.2623159773 | -1.3286229311 | -2.0629571684 |
| C  | -3.8853244992 | -2.4977324193 | 0.21863013    |
| H  | -4.8677999803 | -3.2452448648 | -1.5781495306 |
| C  | -3.6231290576 | 0.0308618147  | -1.8687710196 |
| H  | -4.6802779263 | -1.4917131439 | -3.0566979247 |
| C  | -2.8843620259 | -1.4538824724 | 0.7574926172  |
| H  | -3.4374547733 | -3.4968763692 | 0.3238782157  |
| H  | -4.7613124195 | -2.5091622226 | 0.8860725215  |
| C  | -2.0939945935 | 0.0394896771  | -2.0787356607 |
| H  | -3.8732393719 | 0.4619513521  | -0.8961841634 |
| H  | -4.0485467847 | 0.7196514069  | -2.6085263592 |
| C  | -1.5739847881 | -1.4614293666 | 0.0024108769  |
| H  | -3.3403311548 | -0.4622927968 | 0.7635972885  |
| H  | -2.6690357671 | -1.6910606228 | 1.8048152025  |
| C  | -1.2493780503 | -0.8104621764 | -1.1542288727 |

54

|   |               |               |               |
|---|---------------|---------------|---------------|
| H | -1.8846809525 | -0.3233032805 | -3.095186417  |
| H | -1.7315101038 | 1.0747829063  | -2.0540869302 |
| H | -0.8503214803 | -2.2020322793 | 0.3498829233  |
| H | -0.2816007118 | -1.0817079185 | -1.5854468894 |
| C | -0.3824513291 | 2.1442302489  | 0.2121226177  |
| C | 0.8049634068  | 2.8799472783  | 0.0329302927  |
| C | -1.5908455168 | 2.8589613026  | 0.1162347924  |
| C | 0.7877064955  | 4.2489436383  | -0.2549056309 |
| H | 1.7697489652  | 2.381631354   | 0.1163811956  |
| C | -1.6210392079 | 4.2289140315  | -0.1618721927 |
| H | -2.5413217944 | 2.3462198802  | 0.2670954083  |
| C | -0.4275020715 | 4.9286852947  | -0.352730296  |
| H | 1.7237023693  | 4.7858852995  | -0.3960338184 |
| H | -2.5738962326 | 4.7504437795  | -0.2272421835 |
| H | -0.4450214056 | 5.9940340663  | -0.5697049781 |

53

**9A<sup>3</sup>** B3LYP/BSI Optimized geometry (charge = 0, triplet)

|    |               |               |               |
|----|---------------|---------------|---------------|
| Ni | -0.1975868877 | -0.1757242916 | 0.3620185311  |
| S  | 0.1722930029  | -0.4823206634 | 2.5354352426  |
| C  | -0.481195355  | 0.9487052478  | 3.4809554687  |
| H  | -1.5608934662 | 0.8540899745  | 3.6332280499  |
| H  | 0.0068957424  | 0.9621717488  | 4.4592714309  |
| H  | -0.2752184952 | 1.8880023904  | 2.9624768801  |
| S  | 1.8386950087  | -2.021454425  | -0.4637071326 |
| C  | 3.2702933035  | -0.9385567042 | -0.5842471481 |
| C  | 2.2383239904  | -2.9965836836 | 1.0383409558  |
| C  | 4.1521258754  | -1.1034649544 | -1.6594320146 |
| C  | 3.4915887543  | 0.0721495029  | 0.3612697163  |
| H  | 3.2087335179  | -3.481433635  | 0.911682168   |
| H  | 2.2263155     | -2.359441789  | 1.9247579125  |
| H  | 1.4608829702  | -3.7594982287 | 1.1338128767  |
| C  | 5.2568786779  | -0.2589636461 | -1.7867766124 |
| H  | 3.9725837174  | -1.8897118315 | -2.386549704  |
| C  | 4.6064561883  | 0.9019873825  | 0.2327424528  |
| H  | 2.7943663662  | 0.2070087615  | 1.1841658881  |
| C  | 5.4873897502  | 0.7404642104  | -0.8395432896 |
| H  | 5.9389452739  | -0.3875316047 | -2.6228768064 |
| H  | 4.7782888005  | 1.6836152738  | 0.967555209   |
| H  | 6.3497393286  | 1.3942060506  | -0.9380102701 |
| C  | -5.0393926576 | -1.7842923538 | -0.7232949319 |
| C  | -4.8033677834 | -0.8880491646 | -1.6901064153 |
| C  | -4.4094357539 | -1.9574115513 | 0.6370519741  |
| H  | -5.8194419549 | -2.5196737729 | -0.9272925879 |
| C  | -3.8000846177 | 0.246330529   | -1.7330622604 |
| H  | -5.3995861705 | -0.9955302395 | -2.5968094315 |
| C  | -3.1092494028 | -1.183408774  | 0.9370582496  |
| H  | -4.2211174129 | -3.0310988407 | 0.7869292361  |
| H  | -5.150835809  | -1.6917841462 | 1.4071166973  |
| C  | -2.3739788757 | -0.1955323755 | -2.1207963743 |
| H  | -3.7729463661 | 0.8114640808  | -0.7990145465 |
| H  | -4.1269164464 | 0.9642409809  | -2.4947928307 |
| C  | -1.959149175  | -1.5963763759 | 0.0467387149  |
| H  | -3.2890497657 | -0.1089315081 | 0.8793894443  |
| H  | -2.8175944233 | -1.3852165453 | 1.9731366811  |
| C  | -1.6548332608 | -1.1610070109 | -1.2070197453 |
| H  | -2.4188903458 | -0.6896432856 | -3.102379649  |
| H  | -1.7496511163 | 0.6954747534  | -2.2647579761 |

|   |               |               |               |
|---|---------------|---------------|---------------|
| H | -1.399917331  | -2.4605392752 | 0.4094875246  |
| H | -0.8464995686 | -1.6972176692 | -1.707389457  |
| C | -0.3742905242 | 1.7010336649  | -0.1236530102 |
| C | 0.5671861403  | 2.3043867293  | -0.9819515993 |
| C | -1.4214552802 | 2.5264427141  | 0.3291888491  |
| C | 0.4643818218  | 3.643599095   | -1.3758620286 |
| H | 1.41399389    | 1.7297339434  | -1.3576282628 |
| C | -1.534911315  | 3.8672026938  | -0.052775466  |
| H | -2.1714301273 | 2.1253885444  | 1.0112199378  |
| C | -0.590002017  | 4.4314276371  | -0.9120666487 |
| H | 1.2117287648  | 4.0717698298  | -2.0412756675 |
| H | -2.3586947818 | 4.4717670763  | 0.3220091983  |
| H | -0.6720258985 | 5.4734165305  | -1.2121064227 |

53

**9B<sup>3</sup>** B3LYP/BSI Optimized geometry (charge = 0, triplet)

|    |               |               |               |
|----|---------------|---------------|---------------|
| Ni | -0.3945672864 | 0.1551580964  | 0.049679952   |
| S  | -0.6071830878 | -0.6485247554 | 2.1372689798  |
| C  | -1.1430532238 | 0.6313759318  | 3.3402052157  |
| H  | -2.2332631996 | 0.7224648338  | 3.367366348   |
| H  | -0.7991552315 | 0.3313427133  | 4.3340315158  |
| H  | -0.7067806989 | 1.6054870887  | 3.1003488114  |
| S  | 1.0238404577  | -1.9030738406 | -0.8690498364 |
| C  | 2.734317232   | -1.5543256466 | -0.4387470397 |
| C  | 0.6660779161  | -3.351092967  | 0.1989202407  |
| C  | 3.7181919426  | -1.7274595378 | -1.4187181523 |
| C  | 3.0790167582  | -1.09842092   | 0.8395836872  |
| H  | 1.3953439622  | -4.1388266714 | -0.001905963  |
| H  | 0.6767270846  | -3.0619271477 | 1.2515414953  |
| H  | -0.3341211569 | -3.7026183029 | -0.0668297438 |
| C  | 5.0526114319  | -1.4495791583 | -1.1163475586 |
| H  | 3.4384785226  | -2.0785015164 | -2.4074325566 |
| C  | 4.4175223971  | -0.8382398522 | 1.135724345   |
| H  | 2.3058935219  | -0.9447461396 | 1.5876458152  |
| C  | 5.4036488681  | -1.0100355757 | 0.1611777304  |
| H  | 5.8158845568  | -1.5818245971 | -1.8783349974 |
| H  | 4.6871593441  | -0.4873614836 | 2.1280774419  |
| H  | 6.443044733   | -0.7974210936 | 0.3961369112  |
| C  | -5.2932278613 | -0.9246691056 | -1.0659913405 |
| C  | -5.3843259792 | -0.1204250311 | 0.0007848134  |
| C  | -4.1382763618 | -1.7302349224 | -1.6055497554 |
| H  | -6.2015090955 | -1.0420782545 | -1.6594465567 |
| C  | -4.3263474345 | 0.2762921739  | 1.010426839   |
| H  | -6.3539631607 | 0.3530497981  | 0.1573729881  |
| C  | -2.7424213084 | -1.5064325801 | -0.9886929789 |
| H  | -4.0778667075 | -1.5524667665 | -2.6899162137 |
| H  | -4.385118902  | -2.7993605487 | -1.508127151  |
| C  | -3.3812679145 | 1.3819547117  | 0.5001110606  |
| H  | -3.7410958325 | -0.5756014772 | 1.3648407168  |
| H  | -4.8355869941 | 0.6721609547  | 1.8973704394  |
| C  | -2.1768052827 | -0.125667773  | -1.2634106109 |
| H  | -2.7581693346 | -1.7258176816 | 0.0797628197  |
| H  | -2.0656690934 | -2.2428977663 | -1.4398682052 |
| C  | -2.4538903737 | 1.0578492764  | -0.6439843571 |
| H  | -3.9873633833 | 2.2361570516  | 0.1637509009  |
| H  | -2.7812859469 | 1.7697275916  | 1.3334139515  |
| H  | -1.6277872667 | -0.044747729  | -2.2054022939 |
| H  | -2.0350094758 | 1.9467601463  | -1.1106179126 |



|   |              |              |               |
|---|--------------|--------------|---------------|
| C | 0.5997596825 | 1.8180428676 | -0.1806002195 |
| C | 0.6113263577 | 2.5121592553 | -1.4050414806 |
| C | 1.3813773104 | 2.363974959  | 0.8540155626  |
| C | 1.3560783209 | 3.6817526502 | -1.5944094681 |
| H | 0.0318497012 | 2.1403718699 | -2.2530858106 |
| C | 2.1223706431 | 3.5376037248 | 0.6840121739  |
| H | 1.4212834252 | 1.8611139498 | 1.8190521842  |
| C | 2.1127480731 | 4.2024277675 | -0.5440564038 |
| H | 1.3424407835 | 4.1858901083 | -2.5589863782 |
| H | 2.7111598922 | 3.9323269397 | 1.5100660878  |
| H | 2.6889456753 | 5.1145043815 | -0.680815043  |

53

**TS<sup>3</sup><sub>9B-9C</sub>** B3LYP/BSI Optimized geometry (charge = 0, triplet)

|    |               |               |               |
|----|---------------|---------------|---------------|
| Ni | -0.362739716  | 0.110482935   | 0.0096820199  |
| S  | -0.530662994  | -0.7387768429 | 2.0853782658  |
| C  | -1.1539602584 | 0.4817175178  | 3.3085840507  |
| H  | -2.2472543063 | 0.5244037014  | 3.3173082027  |
| H  | -0.8156045334 | 0.1700670851  | 4.3007545661  |
| H  | -0.7559329052 | 1.4808345423  | 3.1066419774  |
| S  | 1.1216878738  | -1.7961190732 | -0.8853055437 |
| C  | 2.8150664698  | -1.4630248435 | -0.38161666   |
| C  | 0.755629804   | -3.3328964665 | 0.0456648423  |
| C  | 3.8205487502  | -1.5200184936 | -1.3527643762 |
| C  | 3.1247201288  | -1.1361793763 | 0.9440583696  |
| H  | 1.503860253   | -4.0905414921 | -0.1967604529 |
| H  | 0.7298148835  | -3.1319098612 | 1.1183258861  |
| H  | -0.2301460102 | -3.6746487494 | -0.2801966979 |
| C  | 5.1437875569  | -1.2560709471 | -0.9941057057 |
| H  | 3.5666315856  | -1.7702529617 | -2.3783347221 |
| C  | 4.4527546064  | -0.8897134747 | 1.294378595   |
| H  | 2.3331073416  | -1.0682240074 | 1.6855998516  |
| C  | 5.4613794107  | -0.9463616745 | 0.3293409013  |
| H  | 5.9243620527  | -1.2976066093 | -1.7488283998 |
| H  | 4.6964745211  | -0.6394562988 | 2.3233075884  |
| H  | 6.4922405589  | -0.7450197944 | 0.6078682261  |
| C  | -5.350346868  | -0.8485185175 | -1.039938289  |
| C  | -5.420304955  | -0.0629988117 | 0.0422307702  |
| C  | -4.2109926956 | -1.6587196278 | -1.6053614699 |
| H  | -6.2655244704 | -0.9422385908 | -1.6269307512 |
| C  | -4.3468070276 | 0.2981944274  | 1.0487519633  |
| H  | -6.3811954319 | 0.4216170463  | 0.2173171486  |
| C  | -2.8054882986 | -1.4582735878 | -1.0023808404 |
| H  | -4.1619968943 | -1.4646627479 | -2.6874706942 |
| H  | -4.4680938112 | -2.7265319887 | -1.5211574309 |
| C  | -3.3940457236 | 1.4043034782  | 0.5533064302  |
| H  | -3.7687312683 | -0.5698887283 | 1.3744061848  |
| H  | -4.8410922311 | 0.6779563824  | 1.9510768019  |
| C  | -2.2321646326 | -0.0765088915 | -1.2550007529 |
| H  | -2.8075463135 | -1.7004086711 | 0.0611698847  |
| H  | -2.1405937349 | -2.1912269883 | -1.4768646682 |
| C  | -2.489416589  | 1.0956005823  | -0.6119989658 |
| H  | -3.9925187512 | 2.2763627973  | 0.2508741946  |
| H  | -2.7764147255 | 1.7606411725  | 1.388218084   |
| H  | -1.6808412958 | 0.0170251787  | -2.1949896589 |
| H  | -2.048943562  | 1.9864458423  | -1.0553867354 |
| C  | 0.6646004021  | 1.7387968028  | -0.3011568389 |
| C  | 0.640926525   | 2.415794437   | -1.5350245057 |

|   |              |              |               |
|---|--------------|--------------|---------------|
| C | 1.477899042  | 2.2970052747 | 0.7020624094  |
| C | 1.3836694732 | 3.579786394  | -1.7635761475 |
| H | 0.0351857568 | 2.0333930683 | -2.3597755333 |
| C | 2.2178434963 | 3.4648264205 | 0.49270996    |
| H | 1.5435934795 | 1.8079575037 | 1.6728271274  |
| C | 2.1738828911 | 4.1119881052 | -0.7441428725 |
| H | 1.3424948997 | 4.0704904627 | -2.734337609  |
| H | 2.8325388978 | 3.8692628318 | 1.294865118   |
| H | 2.7496123429 | 5.0192941286 | -0.9114860978 |

53

**9C<sup>3</sup>** B3LYP/BSI Optimized geometry (charge = 0, triplet)

|    |               |               |               |
|----|---------------|---------------|---------------|
| Ni | -0.3299859426 | 0.1628620252  | 0.3641303547  |
| S  | -0.5355119773 | -0.8826978771 | 2.3312965193  |
| C  | -1.1881694654 | 0.3508520351  | 3.5338173137  |
| H  | -2.236832609  | 0.593172086   | 3.335576487   |
| H  | -1.1188957226 | -0.0803821512 | 4.5359821914  |
| H  | -0.6018543429 | 1.2746413197  | 3.5148296489  |
| S  | 0.9005860781  | -1.5846502055 | -0.8090135129 |
| C  | 2.6367509487  | -1.3332192418 | -0.4124848912 |
| C  | 0.5962189742  | -3.2100014942 | -0.0162390712 |
| C  | 3.5667951987  | -1.3755342594 | -1.4559805306 |
| C  | 3.0507031331  | -1.0926142105 | 0.9027296151  |
| H  | 1.2894426792  | -3.9440059401 | -0.4325640916 |
| H  | 0.707596819   | -3.1338797495 | 1.0666993384  |
| H  | -0.4309434096 | -3.4968886635 | -0.2528178091 |
| C  | 4.9222340424  | -1.1857729045 | -1.1800839104 |
| H  | 3.2308751012  | -1.5546086489 | -2.4727966667 |
| C  | 4.4089544291  | -0.916244244  | 1.1683994598  |
| H  | 2.317495224   | -1.0399524342 | 1.7030718175  |
| C  | 5.3439611394  | -0.960432048  | 0.1311663675  |
| H  | 5.6456624041  | -1.2158303876 | -1.9901453853 |
| H  | 4.7345870568  | -0.7323040465 | 2.1885059479  |
| H  | 6.3993614016  | -0.8145759041 | 0.3446199968  |
| C  | -5.3934168052 | -0.9085331137 | -1.1388627764 |
| C  | -5.4608680582 | -0.0659337771 | -0.1005998348 |
| C  | -4.2577683036 | -1.7580035704 | -1.6521469436 |
| H  | -6.3055349639 | -1.0228752697 | -1.7269374696 |
| C  | -4.3880016153 | 0.3272755469  | 0.893650363   |
| H  | -6.4158851071 | 0.4399847777  | 0.0434903862  |
| C  | -2.8463643427 | -1.5149161334 | -1.0771637652 |
| H  | -4.2158492965 | -1.6378192554 | -2.7450124338 |
| H  | -4.5147348292 | -2.8174106405 | -1.4932541665 |
| C  | -3.4189317453 | 1.4003904252  | 0.3577242511  |
| H  | -3.8232776101 | -0.5346172494 | 1.2576830089  |
| H  | -4.8806560583 | 0.7494537912  | 1.7779315031  |
| C  | -2.2831912887 | -0.1464014031 | -1.4000665121 |
| H  | -2.834886685  | -1.7078618068 | -0.0023242218 |
| H  | -2.1827584723 | -2.2658940997 | -1.5242269435 |
| C  | -2.5279880543 | 1.0416986753  | -0.8070180398 |
| H  | -4.000791632  | 2.2803403697  | 0.0468831545  |
| H  | -2.7873009514 | 1.7628066065  | 1.1836982034  |
| H  | -1.6558306307 | -0.1105442558 | -2.291506069  |
| H  | -2.0404429265 | 1.9068860327  | -1.2538883156 |
| C  | 0.7105346897  | 1.7160885821  | -0.1713771587 |
| C  | 0.7763611311  | 2.2034160784  | -1.4907087198 |
| C  | 1.4356798356  | 2.4398802423  | 0.7939451419  |
| C  | 1.509010249   | 3.3450554682  | -1.8318246297 |

|   |              |              |               |
|---|--------------|--------------|---------------|
| H | 0.2474773662 | 1.681424346  | -2.2902635022 |
| C | 2.1666887701 | 3.587959445  | 0.4726798511  |
| H | 1.4427756101 | 2.0994917271 | 1.8295740882  |
| C | 2.2058488507 | 4.0456234635 | -0.8457409573 |
| H | 1.5363414295 | 3.6872079116 | -2.8647893056 |
| H | 2.7099990719 | 4.1228695818 | 1.2494378505  |
| H | 2.7756702122 | 4.9356104486 | -1.1025332259 |

53

TS<sup>3</sup><sub>9c-10</sub> B3LYP/BSI Optimized geometry (charge = 0, triplet)

|    |               |               |               |
|----|---------------|---------------|---------------|
| Ni | -0.083750551  | 0.0206063149  | 0.5021532926  |
| S  | -0.3160478218 | -1.355711688  | 2.2079707885  |
| C  | -1.2131026424 | -0.4305340485 | 3.5238872401  |
| H  | -2.2000812651 | -0.1010993414 | 3.1881650326  |
| H  | -1.3412583072 | -1.101517104  | 4.3770247333  |
| H  | -0.63699331   | 0.4400609842  | 3.850678536   |
| S  | 1.0907498023  | -1.3738334523 | -1.0610880819 |
| C  | 2.8302603756  | -1.2334497666 | -0.626506972  |
| C  | 0.757562454   | -3.1347940915 | -0.6775376683 |
| C  | 3.7537166482  | -1.0322045152 | -1.6576007075 |
| C  | 3.2539467842  | -1.3066014927 | 0.7058447307  |
| H  | 1.4142945069  | -3.7617303289 | -1.2843396292 |
| H  | 0.8995220449  | -3.3321743021 | 0.3863171048  |
| H  | -0.2850066212 | -3.324555571  | -0.9428478098 |
| C  | 5.1112306229  | -0.9134088998 | -1.3542476611 |
| H  | 3.4106664856  | -0.9682906459 | -2.6856610703 |
| C  | 4.6142339205  | -1.1969418166 | 0.9962536582  |
| H  | 2.5297239998  | -1.4415122234 | 1.5047315556  |
| C  | 5.5420661669  | -0.9993413803 | -0.0293994792 |
| H  | 5.8292638345  | -0.7549383075 | -2.1539861884 |
| H  | 4.9465280566  | -1.2555183443 | 2.0289337382  |
| H  | 6.5990632128  | -0.907663464  | 0.2048505963  |
| C  | -5.4082549718 | -0.7959070449 | -0.175981913  |
| C  | -5.0572925904 | 0.3679665919  | 0.3844975802  |
| C  | -4.5776352679 | -1.884474927  | -0.8069674121 |
| H  | -6.4760525249 | -1.0222270351 | -0.1848938731 |
| C  | -3.6866050537 | 0.9917240547  | 0.5385606221  |
| H  | -5.8748440815 | 0.9843493491  | 0.7597636805  |
| C  | -3.0768980653 | -1.62032792   | -1.0467641316 |
| H  | -5.0441778718 | -2.1450292309 | -1.7691636914 |
| H  | -4.6731603367 | -2.7920019511 | -0.1896018009 |
| C  | -3.1688186628 | 1.681594684   | -0.7395140028 |
| H  | -2.9436579809 | 0.2676449199  | 0.8885147584  |
| H  | -3.7440352375 | 1.7558242922  | 1.3234279516  |
| C  | -2.7785418821 | -0.526560944  | -2.0546800505 |
| H  | -2.5721436588 | -1.4458517161 | -0.0921637439 |
| H  | -2.6489746963 | -2.5553769308 | -1.4318529622 |
| C  | -2.8268918849 | 0.8076669212  | -1.9197987648 |
| H  | -3.9170128568 | 2.4163885411  | -1.0727431911 |
| H  | -2.2769353555 | 2.2754700763  | -0.4876573631 |
| H  | -2.5137627714 | -0.8914755764 | -3.0476707166 |
| H  | -2.5762715663 | 1.3850913391  | -2.8115080897 |
| C  | 0.6677262892  | 1.7672035325  | 0.1618769993  |
| C  | 0.6947536868  | 2.3397848539  | -1.1252304645 |
| C  | 1.1827913971  | 2.5508049835  | 1.2110844138  |
| C  | 1.1958758839  | 3.6257915826  | -1.3535652973 |
| H  | 0.3139048503  | 1.7778439633  | -1.9783194583 |
| C  | 1.6877184279  | 3.8365631419  | 0.9970157988  |

|   |              |              |               |
|---|--------------|--------------|---------------|
| H | 1.2027803411 | 2.1518260929 | 2.2251108533  |
| C | 1.695365088  | 4.3789249437 | -0.2897984943 |
| H | 1.1994315453 | 4.0375120575 | -2.3609695435 |
| H | 2.0784755675 | 4.4142093007 | 1.8323606172  |
| H | 2.0894408432 | 5.3777435393 | -0.4619770497 |

53

**10<sup>3</sup>** B3LYP/BSI Optimized geometry (charge = 0, triplet)

|    |               |               |               |
|----|---------------|---------------|---------------|
| Ni | -0.083750551  | 0.0206063149  | 0.5021532926  |
| S  | -0.3160478218 | -1.355711688  | 2.2079707885  |
| C  | -1.2131026424 | -0.4305340485 | 3.5238872401  |
| H  | -2.2000812651 | -0.1010993414 | 3.1881650326  |
| H  | -1.3412583072 | -1.101517104  | 4.3770247333  |
| H  | -0.63699331   | 0.4400609842  | 3.850678536   |
| S  | 1.0907498023  | -1.3738334523 | -1.0610880819 |
| C  | 2.8302603756  | -1.2334497666 | -0.626506972  |
| C  | 0.757562454   | -3.1347940915 | -0.6775376683 |
| C  | 3.7537166482  | -1.0322045152 | -1.6576007075 |
| C  | 3.2539467842  | -1.3066014927 | 0.7058447307  |
| H  | 1.4142945069  | -3.7617303289 | -1.2843396292 |
| H  | 0.8995220449  | -3.3321743021 | 0.3863171048  |
| H  | -0.2850066212 | -3.324555571  | -0.9428478098 |
| C  | 5.1112306229  | -0.9134088998 | -1.3542476611 |
| H  | 3.4106664856  | -0.9682906459 | -2.6856610703 |
| C  | 4.6142339205  | -1.1969418166 | 0.9962536582  |
| H  | 2.5297239998  | -1.4415122234 | 1.5047315556  |
| C  | 5.5420661669  | -0.9993413803 | -0.0293994792 |
| H  | 5.8292638345  | -0.7549383075 | -2.1539861884 |
| H  | 4.9465280566  | -1.2555183443 | 2.0289337382  |
| H  | 6.5990632128  | -0.907663464  | 0.2048505963  |
| C  | -5.4082549718 | -0.7959070449 | -0.175981913  |
| C  | -5.0572925904 | 0.3679665919  | 0.3844975802  |
| C  | -4.5776352679 | -1.884474927  | -0.8069674121 |
| H  | -6.4760525249 | -1.0222270351 | -0.1848938731 |
| C  | -3.6866050537 | 0.9917240547  | 0.5385606221  |
| H  | -5.8748440815 | 0.9843493491  | 0.7597636805  |
| C  | -3.0768980653 | -1.62032792   | -1.0467641316 |
| H  | -5.0441778718 | -2.1450292309 | -1.7691636914 |
| H  | -4.6731603367 | -2.7920019511 | -0.1896018009 |
| C  | -3.1688186628 | 1.681594684   | -0.7395140028 |
| H  | -2.9436579809 | 0.2676449199  | 0.8885147584  |
| H  | -3.7440352375 | 1.7558242922  | 1.3234279516  |
| C  | -2.7785418821 | -0.526560944  | -2.0546800505 |
| H  | -2.5721436588 | -1.4458517161 | -0.0921637439 |
| H  | -2.6489746963 | -2.5553769308 | -1.4318529622 |
| C  | -2.8268918849 | 0.8076669212  | -1.9197987648 |
| H  | -3.9170128568 | 2.4163885411  | -1.0727431911 |
| H  | -2.2769353555 | 2.2754700763  | -0.4876573631 |
| H  | -2.5137627714 | -0.8914755764 | -3.0476707166 |
| H  | -2.5762715663 | 1.3850913391  | -2.8115080897 |
| C  | 0.6677262892  | 1.7672035325  | 0.1618769993  |
| C  | 0.6947536868  | 2.3397848539  | -1.1252304645 |
| C  | 1.1827913971  | 2.5508049835  | 1.2110844138  |
| C  | 1.1958758839  | 3.6257915826  | -1.3535652973 |
| H  | 0.3139048503  | 1.7778439633  | -1.9783194583 |
| C  | 1.6877184279  | 3.8365631419  | 0.9970157988  |
| H  | 1.2027803411  | 2.1518260929  | 2.2251108533  |
| C  | 1.695365088   | 4.3789249437  | -0.2897984943 |

|   |              |              |               |
|---|--------------|--------------|---------------|
| H | 1.1994315453 | 4.0375120575 | -2.3609695435 |
| H | 2.0784755675 | 4.4142093007 | 1.8323606172  |
| H | 2.0894408432 | 5.3777435393 | -0.4619770497 |

33

**CP3** B3LYP/BSI Optimized geometry (charge = 0, triplet)

|    |          |          |          |
|----|----------|----------|----------|
| Ni | -1.01274 | -0.74738 | -0.21003 |
| S  | -1.68751 | -2.38822 | 1.0157   |
| C  | -3.34777 | -2.90557 | 0.40502  |
| H  | -3.31272 | -3.24929 | -0.63249 |
| H  | -3.70051 | -3.72712 | 1.03345  |
| H  | -4.05867 | -2.07894 | 0.48313  |
| S  | 0.98497  | -0.6578  | -1.40494 |
| C  | 2.25921  | -0.08724 | -0.27267 |
| C  | 1.48175  | -2.40473 | -1.66113 |
| C  | 3.25514  | 0.76195  | -0.76567 |
| C  | 2.2573   | -0.473   | 1.07315  |
| H  | 2.47235  | -2.4341  | -2.12042 |
| H  | 1.47394  | -2.95063 | -0.71602 |
| H  | 0.74867  | -2.84628 | -2.34066 |
| C  | 4.261    | 1.21541  | 0.08974  |
| H  | 3.23969  | 1.06335  | -1.80839 |
| C  | 3.27049  | -0.02116 | 1.91857  |
| H  | 1.47122  | -1.11685 | 1.4567   |
| C  | 4.2721   | 0.82075  | 1.42855  |
| H  | 5.03493  | 1.87506  | -0.29239 |
| H  | 3.27177  | -0.3228  | 2.96203  |
| H  | 5.05711  | 1.17286  | 2.092    |
| C  | -1.49701 | 1.08295  | -0.11162 |
| C  | -1.44641 | 1.92297  | -1.23795 |
| C  | -1.95959 | 1.64075  | 1.09269  |
| C  | -1.83287 | 3.26534  | -1.16727 |
| H  | -1.09719 | 1.53736  | -2.19519 |
| C  | -2.34622 | 2.98165  | 1.17273  |
| H  | -2.02449 | 1.021    | 1.98434  |
| C  | -2.28077 | 3.79919  | 0.04198  |
| H  | -1.78177 | 3.89168  | -2.05544 |
| H  | -2.6971  | 3.3888   | 2.11891  |
| H  | -2.57825 | 4.84314  | 0.10261  |

55

**TS<sub>2-25</sub>** B3LYP/BSI Optimized geometry (charge = 0, singlet)

|    |              |               |               |
|----|--------------|---------------|---------------|
| Ni | 0.6799719788 | -0.3427052833 | -0.4707581408 |
| C  | 2.1953201098 | 0.8954342817  | -1.0195059812 |
| C  | 1.618399831  | 1.3346185549  | 0.1793886622  |
| C  | 2.1871667066 | 1.1276010879  | 1.5715354681  |
| C  | 2.7107439273 | -0.3089991548 | 1.8123117002  |
| C  | 1.8840515595 | -1.3582923384 | 1.0893692941  |
| C  | 2.1479046444 | -1.8672351786 | -0.1615228928 |
| C  | 3.2682141533 | -1.4318780743 | -1.0858309149 |
| C  | 3.4944200073 | 0.1011551524  | -1.131989784  |
| H  | 1.9296514062 | 1.4471118272  | -1.917509791  |
| H  | 0.9437768061 | 2.1882789077  | 0.094636465   |
| H  | 1.3903981701 | 1.3355539978  | 2.2972298382  |
| H  | 2.98217397   | 1.8606488302  | 1.7861104637  |
| H  | 3.760462233  | -0.3871831036 | 1.512330958   |
| H  | 2.694821085  | -0.5217463021 | 2.8882430147  |

|    |               |               |               |
|----|---------------|---------------|---------------|
| H  | 1.1896383674  | -1.9202433925 | 1.7072657843  |
| H  | 1.6803301384  | -2.8130221065 | -0.4275862739 |
| H  | 3.0203877013  | -1.7810195323 | -2.0948108504 |
| H  | 4.205790137   | -1.9408334939 | -0.8107220221 |
| H  | 4.1908692614  | 0.4086922368  | -0.3447236596 |
| H  | 3.9860395504  | 0.3524351484  | -2.0789933853 |
| C  | -1.6451429161 | 0.4236158573  | 0.8167810397  |
| C  | -1.5375895279 | -0.9077161028 | 1.0241574198  |
| C  | -1.5948598769 | 1.5786250495  | 1.7910849299  |
| H  | -1.9515995135 | 0.7229082781  | -0.1826805009 |
| C  | -1.3449262622 | -1.6514805281 | 2.3269837516  |
| H  | -1.7827680324 | -1.5462837536 | 0.1785468979  |
| C  | -1.7140639904 | 1.2669098681  | 3.299287863   |
| H  | -2.4180656965 | 2.2546293284  | 1.5181176001  |
| H  | -0.6810816617 | 2.1650508854  | 1.6227009601  |
| C  | -2.6681474032 | -1.8728552205 | 3.0918122552  |
| H  | -0.6174095481 | -1.1618991416 | 2.9764178573  |
| H  | -0.9291490932 | -2.6418059231 | 2.1033961013  |
| C  | -3.0286912956 | 0.6228908143  | 3.688107601   |
| H  | -0.8589686024 | 0.6717284786  | 3.6300062065  |
| H  | -1.6287179421 | 2.2213274913  | 3.8335255296  |
| C  | -3.4093701996 | -0.6572470784 | 3.5917275762  |
| H  | -3.353804397  | -2.4409143064 | 2.4455024915  |
| H  | -2.4686273004 | -2.5388924378 | 3.9467419846  |
| H  | -3.7740014053 | 1.3176285061  | 4.0764523899  |
| H  | -4.4208745487 | -0.8861635106 | 3.9314600343  |
| Si | -0.4378583817 | -0.0321293651 | -2.4739374675 |
| H  | -0.0561560431 | -1.3261326191 | -1.3684706504 |
| C  | -2.1854937268 | -0.7579609449 | -2.7394056355 |
| H  | -2.1606840344 | -1.8478312511 | -2.8624091733 |
| H  | -2.8553883439 | -0.5410801416 | -1.8973109004 |
| H  | -2.6524135893 | -0.3327274244 | -3.6374020393 |
| C  | 0.6122539164  | -0.517874188  | -3.9853153618 |
| H  | 0.1297387475  | -0.1895626433 | -4.9150407797 |
| H  | 1.6117811938  | -0.0683520246 | -3.9568121586 |
| H  | 0.7387737965  | -1.6057675485 | -4.0424728876 |
| C  | -0.765581385  | 1.8571162487  | -2.6228769372 |
| H  | -1.469643743  | 2.2158280968  | -1.8626738733 |
| H  | 0.1379531629  | 2.4724259139  | -2.5505097616 |
| H  | -1.2211707206 | 2.0558404424  | -3.6032289047 |

35

**25** B3LYP/BSI Optimized geometry (charge = 0, singlet)

|    |           |           |           |
|----|-----------|-----------|-----------|
| Ni | 0.027307  | 0.131555  | -0.362761 |
| C  | 0.960621  | 0.187023  | 1.473937  |
| C  | 0.787949  | -1.123921 | 1.055899  |
| C  | 1.813547  | -1.994413 | 0.357123  |
| C  | 2.697336  | -1.238871 | -0.672098 |
| C  | 1.915684  | -0.201381 | -1.451833 |
| C  | 1.793816  | 1.124856  | -1.13888  |
| C  | 2.353407  | 1.823643  | 0.081537  |
| C  | 2.250375  | 0.991212  | 1.388041  |
| H  | 0.219926  | 0.574599  | 2.17157   |
| H  | -0.046278 | -1.67698  | 1.48517   |
| H  | 1.272101  | -2.79528  | -0.162192 |
| H  | 2.45645   | -2.497875 | 1.095889  |
| H  | 3.551681  | -0.774089 | -0.172355 |
| H  | 3.117974  | -1.968307 | -1.373851 |

|    |           |           |           |
|----|-----------|-----------|-----------|
| H  | 1.550334  | -0.515914 | -2.428331 |
| H  | 1.378601  | 1.781986  | -1.901128 |
| H  | 1.793978  | 2.75771   | 0.21345   |
| H  | 3.399122  | 2.122401  | -0.088703 |
| H  | 3.117259  | 0.331237  | 1.488303  |
| H  | 2.297329  | 1.677762  | 2.241029  |
| Si | -2.210062 | 0.034468  | -0.057813 |
| H  | -0.893816 | 0.475425  | -1.4908   |
| C  | -2.938779 | -1.538653 | -0.855506 |
| H  | -2.871353 | -1.497363 | -1.948763 |
| H  | -2.414015 | -2.443933 | -0.525305 |
| H  | -3.996921 | -1.656213 | -0.586522 |
| C  | -3.249313 | 1.527163  | -0.631714 |
| H  | -4.288949 | 1.445031  | -0.287987 |
| H  | -2.847185 | 2.468568  | -0.23545  |
| H  | -3.256441 | 1.6095    | -1.724813 |
| C  | -2.59763  | -0.095479 | 1.820947  |
| H  | -2.10874  | -0.949366 | 2.305619  |
| H  | -2.296366 | 0.811129  | 2.360843  |
| H  | -3.680501 | -0.213193 | 1.96629   |

35

TS<sub>25-26</sub> B3LYP/BSI Optimized geometry (charge = 0, singlet)

|    |               |               |               |
|----|---------------|---------------|---------------|
| Ni | -1.4003949692 | -0.3647762965 | -0.2929701579 |
| Si | -1.336925225  | -2.4917425924 | 0.6743614678  |
| H  | -1.9279653343 | -1.7097546762 | -0.6998258057 |
| C  | 0.4914591893  | -3.0125727217 | 0.6016402247  |
| C  | -2.3469618931 | -4.0280760741 | 0.182343468   |
| C  | -1.9002402173 | -2.0628584441 | 2.4416153378  |
| H  | 1.173113724   | -2.2463602216 | 0.9825163331  |
| H  | 0.6382887196  | -3.9224904711 | 1.198868099   |
| H  | 0.7874121872  | -3.2458901592 | -0.4281053443 |
| H  | -2.1763744318 | -4.8572312625 | 0.881105102   |
| H  | -3.4220009704 | -3.8096377408 | 0.1835117837  |
| H  | -2.0844026782 | -4.3792640848 | -0.822888157  |
| H  | -1.3119853888 | -1.2575100651 | 2.8882022504  |
| H  | -2.9526926734 | -1.7554036601 | 2.4480639162  |
| H  | -1.8145669273 | -2.9526129722 | 3.0805734193  |
| C  | -0.8377823512 | 1.3967039715  | -1.0070043575 |
| C  | -1.9876971542 | 1.4993803869  | -0.2021694752 |
| C  | 0.574222615   | 1.8999380384  | -0.7175687538 |
| H  | -1.039984485  | 1.3009009058  | -2.0770248421 |
| C  | -2.1648398774 | 2.1584264276  | 1.1547684857  |
| H  | -2.9383554601 | 1.4662955407  | -0.7457030969 |
| C  | 1.421686864   | 1.0093562832  | 0.212290005   |
| H  | 0.5521386722  | 2.9280872898  | -0.3401944297 |
| H  | 1.110892358   | 1.955613578   | -1.6726939196 |
| C  | -0.8952583801 | 2.490133503   | 1.9695905721  |
| H  | -2.8280411959 | 1.5291035175  | 1.7666361928  |
| H  | -2.7175054092 | 3.0989264853  | 1.0003158163  |
| C  | 0.8792659341  | 0.6752127039  | 1.5808124829  |
| H  | 1.6079700208  | 0.0581900073  | -0.3064958404 |
| H  | 2.416647011   | 1.4679283926  | 0.3329215405  |
| C  | -0.0571796967 | 1.2862764789  | 2.3210075769  |
| H  | -0.305378286  | 3.2398831753  | 1.4369778611  |
| H  | -1.2191264928 | 2.9717556083  | 2.9007406293  |
| H  | 1.3652149006  | -0.1868914522 | 2.0395226996  |
| H  | -0.2691825083 | 0.8472544405  | 3.2962371458  |

35

**26** B3LYP/BSI Optimized geometry (charge = 0, singlet)

|    |               |               |               |
|----|---------------|---------------|---------------|
| Ni | -0.5820081735 | -0.1823135157 | -0.9846536194 |
| Si | -0.4358241184 | -2.1879872423 | 0.1429304159  |
| H  | -1.0474385169 | -1.5852502654 | -1.3074066748 |
| C  | 1.4126292115  | -2.6321508463 | 0.134712753   |
| C  | -1.3744114    | -3.8069768356 | -0.2034005503 |
| C  | -1.0352160589 | -1.6101159069 | 1.8532739069  |
| H  | 2.0451230917  | -1.8205672416 | 0.5055980256  |
| H  | 1.5779014208  | -3.5094627191 | 0.7744311124  |
| H  | 1.7512195207  | -2.8940895418 | -0.874642365  |
| H  | -1.1804144794 | -4.5564696946 | 0.5748551547  |
| H  | -2.4573943968 | -3.6342278385 | -0.2338738412 |
| H  | -1.0843331653 | -4.2435718541 | -1.1668467532 |
| H  | -0.4627653839 | -0.7567649326 | 2.2255766249  |
| H  | -2.0929694934 | -1.3238862386 | 1.8195328872  |
| H  | -0.9408042256 | -2.4352184359 | 2.5729457525  |
| C  | 0.0593775408  | 1.6176858243  | -1.4480764996 |
| C  | -1.0767674265 | 1.6706605788  | -0.6173717393 |
| C  | 1.4861529786  | 2.0936488386  | -1.1842982567 |
| H  | -0.1768206117 | 1.6217026454  | -2.5184699294 |
| C  | -1.2332178597 | 2.2296419717  | 0.7881542092  |
| H  | -2.0325689756 | 1.7043127988  | -1.1550204666 |
| C  | 2.35838675    | 1.2362440158  | -0.2505387744 |
| H  | 1.4853855965  | 3.1359539032  | -0.8437279757 |
| H  | 2.0031447981  | 2.1104479862  | -2.1518668553 |
| C  | 0.032138764   | 2.7324772853  | 1.5156026312  |
| H  | -1.7489294755 | 1.4941534721  | 1.4219869967  |
| H  | -1.9252701642 | 3.082941954   | 0.7143915409  |
| C  | 1.9529437314  | 1.0501538065  | 1.1891984583  |
| H  | 2.4493681665  | 0.2359229781  | -0.6985347286 |
| H  | 3.3814145216  | 1.6462813438  | -0.2640767249 |
| C  | 1.0098335269  | 1.6551002194  | 1.9229700446  |
| H  | 0.5165305155  | 3.4982359659  | 0.9040126116  |
| H  | -0.3017656079 | 3.2475593516  | 2.4250330918  |
| H  | 2.5493307641  | 0.2936634161  | 1.70283332    |
| H  | 0.9147546342  | 1.3208037532  | 2.9567192172  |

16

**PhSMe** B3LYP/BSI Optimized geometry (charge = 0, singlet)

|   |               |               |               |
|---|---------------|---------------|---------------|
| S | -1.8952066516 | 0.0546722721  | -0.6555759467 |
| C | -0.1479673324 | -0.0466006862 | -0.3075001476 |
| C | 0.5645090809  | -1.2445552706 | -0.1678849623 |
| C | 0.5335433151  | 1.1746522155  | -0.1691722104 |
| C | 1.935063528   | -1.2161732446 | 0.1053961477  |
| H | 0.0659936701  | -2.202298325  | -0.2691904778 |
| C | 1.8987193422  | 1.1919999438  | 0.103030703   |
| H | -0.0102101436 | 2.1099421233  | -0.2756965608 |
| C | 2.6093572866  | -0.0039448271 | 0.2422783294  |
| H | 2.4735347009  | -2.1546241215 | 0.2108456326  |
| H | 2.4096743504  | 2.1456907998  | 0.2068209117  |
| H | 3.6745004773  | 0.0116347078  | 0.4546535673  |
| C | -2.4136878324 | -1.688542159  | -0.7628983415 |
| H | -2.2542167093 | -2.2160696931 | 0.1817086365  |
| H | -3.4853357935 | -1.6645649895 | -0.9766303458 |
| H | -1.9035137188 | -2.2121366056 | -1.5762690253 |



14

**HSiMe<sub>3</sub>** B3LYP/BSI Optimized geometry (charge = 0 , singlet)

|    |               |               |               |
|----|---------------|---------------|---------------|
| Si | -0.0001645875 | 0.0000368265  | 0.3770141641  |
| H  | -0.0002119143 | -0.0000998472 | 1.8726495605  |
| C  | -1.1795880785 | -1.3550192211 | -0.2206745137 |
| H  | -1.2164815949 | -1.3966905032 | -1.3162958959 |
| H  | -0.8658296858 | -2.3424677871 | 0.1382734213  |
| H  | -2.2006944073 | -1.1809857527 | 0.139037732   |
| C  | -0.5838892286 | 1.6990621808  | -0.2204542399 |
| H  | 0.0770777574  | 2.4963330881  | 0.1398511898  |
| H  | -0.6008929186 | 1.7521061786  | -1.3160719281 |
| H  | -1.5961600458 | 1.9208301089  | 0.1379718088  |
| C  | 1.7631632761  | -0.3438592359 | -0.2204353126 |
| H  | 2.4613620747  | 0.421660978   | 0.1385115157  |
| H  | 2.1229865879  | -1.3151203803 | 0.1394520656  |
| H  | 1.8178927653  | -0.3551266334 | -1.3160495674 |

20

**COD** B3LYP/BSI Optimized geometry (charge = 0 , singlet)

|   |               |               |               |
|---|---------------|---------------|---------------|
| C | 1.2139093548  | -1.2394618961 | -0.4926256836 |
| C | -0.0093989302 | -1.7067210764 | -0.2133452986 |
| C | 1.9231777645  | 0.0099144254  | -0.0299485567 |
| H | 1.8206555446  | -1.8492476591 | -1.1644823667 |
| C | -1.0868165406 | -1.1063144403 | 0.6650712415  |
| H | -0.2912064089 | -2.6402381179 | -0.7016721466 |
| C | 1.0868288039  | 1.1063398051  | 0.6650217316  |
| H | 2.4168531446  | 0.4542683443  | -0.9071678745 |
| H | 2.7472314223  | -0.281719901  | 0.6414268072  |
| C | -1.9231682712 | -0.0099173292 | -0.0299403324 |
| H | -0.6735397959 | -0.7217723671 | 1.6008437642  |
| H | -1.777470002  | -1.9072375128 | 0.9575832629  |
| C | 0.0094075962  | 1.7067107426  | -0.2134147624 |
| H | 0.6735558937  | 0.7218358032  | 1.6008115714  |
| H | 1.7774834461  | 1.9072747711  | 0.957498416   |
| C | -1.2139018648 | 1.2394402506  | -0.4926711025 |
| H | -2.4168471049 | -0.4543069564 | -0.9071396041 |
| H | -2.7472192858 | 0.2817442733  | 0.6414264204  |
| H | 0.2912130737  | 2.6402080291  | -0.7017805473 |
| H | -1.8206508399 | 1.8491988118  | -1.1645499396 |

18

**Me<sub>3</sub>SiSMe** B3LYP/BSI Optimized geometry (charge = 0 , singlet)

|    |               |               |               |
|----|---------------|---------------|---------------|
| Si | -0.6599409939 | -0.0544346373 | -0.0000706236 |
| S  | 1.2843836941  | 0.917521956   | -0.0003800299 |
| C  | 2.4447882141  | -0.5158025943 | 0.000067518   |
| H  | 2.320312102   | -1.1325834082 | -0.8936981342 |
| H  | 3.4554221227  | -0.1011195986 | -0.0000555371 |
| H  | 2.3203035504  | -1.132031874  | 0.894212323   |
| C  | -0.8747315704 | -1.1258396872 | -1.5456325546 |
| H  | -0.1316817878 | -1.9305201485 | -1.5936706535 |
| H  | -1.8668211233 | -1.5958305499 | -1.5523467868 |
| H  | -0.7786333906 | -0.5258330461 | -2.4572607587 |
| C  | -0.8747067313 | -1.1249068978 | 1.5461414094  |
| H  | -0.7785671034 | -0.5243557203 | 2.4574065931  |
| H  | -1.8668071751 | -1.5948701438 | 1.5531684779  |

|   |               |               |               |
|---|---------------|---------------|---------------|
| H | -0.1316745906 | -1.9295760153 | 1.5946391703  |
| C | -1.9014386979 | 1.3689194933  | -0.0004902581 |
| H | -1.7841195932 | 2.0023977914  | -0.8867568541 |
| H | -2.9275987271 | 0.9803526729  | -0.000382722  |
| H | -1.7841281987 | 2.0029124077  | 0.8854094209  |

12

**benzene** B3LYP/BSI Optimized geometry (charge = 0 , singlet)

|   |               |               |              |
|---|---------------|---------------|--------------|
| C | 0.9087126268  | -1.0617187076 | 0.0000082143 |
| C | -0.4645431881 | -1.31774513   | 0.0000102971 |
| C | -1.3729127377 | -0.2564544809 | 0.0000128914 |
| C | -0.9079693124 | 1.0608515897  | 0.00001167   |
| C | 0.4653242037  | 1.3168640698  | 0.0000086627 |
| C | 1.3736598495  | 0.2555417626  | 0.0000077797 |
| H | 1.6155006082  | -1.8875209327 | 0.0000074232 |
| H | -0.8263005445 | -2.3427774613 | 0.0000106718 |
| H | -2.4414987847 | -0.4556525806 | 0.0000152522 |
| H | -1.6147767767 | 1.8866743528  | 0.0000130631 |
| H | 0.8271118805  | 2.3418844309  | 0.0000083864 |
| H | 2.4422521755  | 0.4547130873  | 0.000005688  |

33

**1T** B3LYP/BSI Optimized geometry (charge = 0 singlet)

|    |               |               |               |
|----|---------------|---------------|---------------|
| Ni | 0.1054867446  | -0.6379167561 | 0.6591137553  |
| S  | -2.5986880763 | -0.1123321978 | -0.6251018901 |
| C  | -1.7981097478 | -0.5646672562 | 0.9297923408  |
| C  | -4.3775361774 | -0.3175885066 | -0.2088552896 |
| C  | -2.0062753915 | 0.2624409425  | 2.0889284666  |
| C  | -1.2842685305 | -1.9052025032 | 1.1329500387  |
| H  | -4.9454425263 | -0.045024858  | -1.1033452699 |
| H  | -4.5961090611 | -1.3561959995 | 0.0538780828  |
| H  | -4.6684087983 | 0.3398573778  | 0.6147078306  |
| C  | -1.7584675694 | -0.2110458239 | 3.3604562652  |
| H  | -2.3929094299 | 1.2684670321  | 1.9438930341  |
| C  | -1.0531569419 | -2.3558819445 | 2.4732119536  |
| H  | -1.4049938191 | -2.6547796709 | 0.3518371422  |
| C  | -1.2799398581 | -1.5330488969 | 3.5566550741  |
| H  | -1.928126306  | 0.4340864372  | 4.2189778403  |
| H  | -0.7241453003 | -3.3811915124 | 2.6293716749  |
| H  | -1.1013418422 | -1.8967549003 | 4.5652061017  |
| S  | 2.1202982355  | -0.2360432203 | 0.0916045667  |
| C  | 2.1045360504  | 0.6515309704  | -1.4771754166 |
| C  | 3.0100991103  | 0.9798646865  | 1.1530583712  |
| C  | 0.93686926    | 1.2948117482  | -1.9013923992 |
| C  | 3.250428275   | 0.665513943   | -2.279901122  |
| H  | 4.0105872387  | 1.1486410945  | 0.7473500265  |
| H  | 2.4638463738  | 1.923210897   | 1.214343886   |
| H  | 3.0883183473  | 0.5322261489  | 2.146816922   |
| C  | 0.9214939956  | 1.9628427438  | -3.1262045012 |
| H  | 0.0554573696  | 1.2578021241  | -1.2688912646 |
| C  | 3.2299616955  | 1.3417065166  | -3.5006606646 |
| H  | 4.1472512556  | 0.1450659365  | -1.955511658  |
| C  | 2.0668835602  | 1.989731236   | -3.9246254968 |
| H  | 0.0124043054  | 2.4586771787  | -3.4545469179 |
| H  | 4.119509807   | 1.3538166188  | -4.1246549971 |
| H  | 2.052794752   | 2.509526414   | -4.878705486  |

33

| <b>TS1T-10B</b> B3LYP/BSI Optimized geometry (charge = 0                    singlet) |               |               |               |
|--------------------------------------------------------------------------------------|---------------|---------------|---------------|
| Ni                                                                                   | -0.596042043  | -0.4505087159 | -0.7371890056 |
| S                                                                                    | -2.7213369176 | -0.0412239114 | -0.9308454365 |
| C                                                                                    | -1.8097165473 | -0.4865119974 | 0.6902294444  |
| C                                                                                    | -3.6131722081 | -1.5861508275 | -1.3793615996 |
| C                                                                                    | -1.858751559  | 0.4751763579  | 1.7350393534  |
| C                                                                                    | -1.3830218612 | -1.8110484642 | 0.9995406702  |
| H                                                                                    | -4.6526100019 | -1.3182453737 | -1.5853799264 |
| H                                                                                    | -3.1721052011 | -2.0576340094 | -2.2601256007 |
| H                                                                                    | -3.5825713842 | -2.2813482445 | -0.5363489118 |
| C                                                                                    | -1.4336997703 | 0.143739489   | 3.0123854394  |
| H                                                                                    | -2.2175841161 | 1.4781132071  | 1.5207954416  |
| C                                                                                    | -0.9691546654 | -2.1203745093 | 2.3063859593  |
| H                                                                                    | -1.4632688795 | -2.6157752508 | 0.274848239   |
| C                                                                                    | -0.9811769605 | -1.1551920581 | 3.3082065403  |
| H                                                                                    | -1.4663006005 | 0.8965330312  | 3.7965883623  |
| H                                                                                    | -0.6401144875 | -3.1328956747 | 2.5305819555  |
| H                                                                                    | -0.6657124478 | -1.4067927077 | 4.3168799724  |
| S                                                                                    | 1.4680244604  | -0.6478775081 | -1.2494432984 |
| C                                                                                    | 1.999935386   | 0.5541723321  | -2.4877523439 |
| C                                                                                    | 2.4527871458  | -0.1029942169 | 0.2075524099  |
| C                                                                                    | 1.026942044   | 1.3634421671  | -3.0783220611 |
| C                                                                                    | 3.3309407009  | 0.6255080305  | -2.9125642043 |
| H                                                                                    | 3.5173139952  | -0.2598607586 | 0.0186118749  |
| H                                                                                    | 2.2594104125  | 0.946371666   | 0.4383553226  |
| H                                                                                    | 2.1313727202  | -0.7261272396 | 1.0452557318  |
| C                                                                                    | 1.3844475229  | 2.2575467822  | -4.0878775491 |
| H                                                                                    | 0.0032332844  | 1.2596755939  | -2.7256365207 |
| C                                                                                    | 3.6858610841  | 1.5327728774  | -3.9119767545 |
| H                                                                                    | 4.0831520055  | -0.0234516056 | -2.4725007701 |
| C                                                                                    | 2.715088425   | 2.3479151395  | -4.5015276699 |
| H                                                                                    | 0.6250726734  | 2.8864287942  | -4.5448527049 |
| H                                                                                    | 4.7204445813  | 1.5949511867  | -4.2390866855 |
| H                                                                                    | 2.9965606396  | 3.0472284585  | -5.2841136239 |

33

| <b>10B</b> B3LYP/BSI Optimized geometry (charge = 0                    singlet) |               |               |               |
|---------------------------------------------------------------------------------|---------------|---------------|---------------|
| Ni                                                                              | -0.7849202405 | -0.061939917  | -0.0216758038 |
| S                                                                               | -2.7492782976 | 0.3683387237  | -0.6031507119 |
| C                                                                               | -0.9004212773 | -0.6834077195 | 1.7163332776  |
| C                                                                               | -3.5638082233 | -1.2236909479 | -1.0464657776 |
| C                                                                               | -1.3412164751 | 0.1410156365  | 2.7639159882  |
| C                                                                               | -0.5351736856 | -2.0057618234 | 2.0173235512  |
| H                                                                               | -4.5818048503 | -1.0010945137 | -1.377077216  |
| H                                                                               | -3.0379451604 | -1.7470776559 | -1.849322138  |
| H                                                                               | -3.6143940675 | -1.8715289003 | -0.1673421641 |
| C                                                                               | -1.3911001873 | -0.3373821307 | 4.0772422361  |
| H                                                                               | -1.6636608252 | 1.1582188301  | 2.5592218999  |
| C                                                                               | -0.5943935497 | -2.4860524563 | 3.3301438751  |
| H                                                                               | -0.1973242279 | -2.6756744072 | 1.2291913126  |
| C                                                                               | -1.0188969736 | -1.6522106746 | 4.3657783283  |
| H                                                                               | -1.7359322468 | 0.3180536915  | 4.8741422594  |
| H                                                                               | -0.3050650976 | -3.5135496758 | 3.5401567704  |
| H                                                                               | -1.0646593867 | -2.0241890685 | 5.3861322427  |
| S                                                                               | 1.4403109627  | -0.2105215654 | -0.0822664515 |
| C                                                                               | 1.9618515814  | 0.6134031445  | -1.5993848395 |

|   |               |              |               |
|---|---------------|--------------|---------------|
| C | 2.1064374618  | 0.9275575825 | 1.1926361224  |
| C | 1.0137619849  | 1.2282865716 | -2.4229616676 |
| C | 3.3111751479  | 0.5866167498 | -1.9712592856 |
| H | 3.1971438166  | 0.8801200266 | 1.1871579454  |
| H | 1.7673130707  | 1.9493385705 | 1.0117819297  |
| H | 1.7180530914  | 0.5721561832 | 2.1491995337  |
| C | 1.4208918728  | 1.8294832116 | -3.6152134911 |
| H | -0.0365152613 | 1.2308435893 | -2.1390913551 |
| C | 3.7117051561  | 1.2016541308 | -3.1574223525 |
| H | 4.0401073888  | 0.0848948154 | -1.3410384228 |
| C | 2.7679395769  | 1.8223533604 | -3.9804089703 |
| H | 0.6821879479  | 2.3052264522 | -4.253862825  |
| H | 4.7595306569  | 1.1859841359 | -3.4440985521 |
| H | 3.0826733168  | 2.29377705   | -4.9071712479 |

51

**C1<sub>1</sub>** B3LYP/BSI Optimized geometry (charge = 0, singlet)

|    |               |               |               |
|----|---------------|---------------|---------------|
| Ni | -0.4060319161 | 0.2659390862  | 0.6203564574  |
| S  | -2.5603663458 | 1.6645355855  | -2.2161334364 |
| C  | -1.757087707  | 1.7493339997  | -0.6332134413 |
| C  | -3.8272108179 | 0.3737325072  | -1.9724440723 |
| C  | -2.3244227776 | 1.2930350004  | 0.5824066985  |
| C  | -0.4805617904 | 2.3370951511  | -0.5828799813 |
| H  | -3.3766660822 | -0.551534747  | -1.6035115501 |
| H  | -4.6251789294 | 0.7033546312  | -1.3020447749 |
| H  | -4.2550360613 | 0.1928735025  | -2.9618515    |
| C  | -1.6750980118 | 1.5173383389  | 1.8183835544  |
| H  | -3.2862934961 | 0.7977149351  | 0.5865877056  |
| C  | 0.1707761092  | 2.5432290907  | 0.6507698511  |
| H  | 0.0125129475  | 2.6330664697  | -1.5027358203 |
| C  | -0.4312754672 | 2.175537346   | 1.8623870138  |
| H  | -2.1551054668 | 1.1871722102  | 2.7329129404  |
| H  | 1.1604691958  | 2.98751928    | 0.6504928057  |
| H  | 0.0697423643  | 2.3532844908  | 2.8071128915  |
| Si | -1.0639217799 | -1.8188281398 | 1.0371737828  |
| C  | -2.8708598892 | -1.8603250386 | 1.6987668315  |
| C  | -1.1283410325 | -2.9531814006 | -0.5007887517 |
| C  | -0.0880858532 | -2.7133536439 | 2.4143414002  |
| H  | -3.004612393  | -1.2555689357 | 2.6046235073  |
| H  | -3.6058075827 | -1.5218104744 | 0.9578544684  |
| H  | -3.1353684178 | -2.8938644408 | 1.961655003   |
| H  | -1.8189075947 | -2.5528745275 | -1.2545159374 |
| H  | -1.4909181194 | -3.9530014632 | -0.2256362432 |
| H  | -0.1535483588 | -3.0752287412 | -0.9851915083 |
| H  | -0.4994327102 | -3.7186618725 | 2.5782163956  |
| H  | 0.978241913   | -2.824033044  | 2.1911810173  |
| H  | -0.1731700368 | -2.1674986682 | 3.3626074272  |
| C  | 1.2946278696  | -0.5947001511 | 0.149707905   |
| H  | 1.9978753687  | -0.51869348   | 2.1762921014  |
| C  | 2.3331540148  | -0.152401277  | 1.1975420247  |
| C  | 1.6113176626  | -0.2338695271 | -1.3204092266 |
| H  | 1.279991641   | -1.6909177401 | 0.1869176567  |
| H  | 2.3659319539  | 0.9418266366  | 1.2797031718  |
| C  | 3.7949936589  | -0.6514761201 | 0.9757362071  |
| C  | 2.7512216387  | -1.0580336876 | -1.9907475937 |
| H  | 1.8477393166  | 0.835866172   | -1.4017321324 |
| H  | 0.7009308278  | -0.3836797467 | -1.9130785521 |
| C  | 4.6538938941  | 0.2861086694  | 0.1565019411  |

|   |              |               |               |
|---|--------------|---------------|---------------|
| H | 3.7754269436 | -1.6597978525 | 0.5490553247  |
| H | 4.2710877291 | -0.7550364533 | 1.9592878721  |
| C | 4.0340170773 | -0.26894209   | -2.2984352594 |
| H | 2.9831105032 | -1.9392713287 | -1.3829583961 |
| H | 2.3888285818 | -1.4553671354 | -2.9482907499 |
| C | 4.743077811  | 0.4410191172  | -1.1707569856 |
| H | 3.7927818718 | 0.4916753     | -3.0576764061 |
| H | 5.4428382415 | 1.2036929239  | -1.5185914747 |
| H | 5.2733296652 | 0.9571973725  | 0.754201694   |
| H | 4.7532888368 | -0.9390780903 | -2.7974078562 |

51

TS<sub>Cl<sub>a</sub></sub> B3LYP/BSI Optimized geometry (charge = 0, singlet)

|    |                 |                 |                 |
|----|-----------------|-----------------|-----------------|
| Ni | -3.870821223979 | 1.999538834628  | -7.056834708374 |
| S  | -6.755717763405 | 1.768218923450  | -7.701786421878 |
| C  | -5.511365504397 | 2.999697420383  | -7.297320298243 |
| C  | -8.276754462434 | 2.155994784965  | -6.730349192461 |
| C  | -4.953507155742 | 3.080161025217  | -5.938796198810 |
| C  | -5.498862485317 | 4.163488388470  | -8.150361566883 |
| H  | -8.062678599911 | 2.147248325556  | -5.659756210665 |
| H  | -8.599466063287 | 3.153210903856  | -7.037020562244 |
| H  | -9.045857489270 | 1.421062383836  | -6.976484191902 |
| C  | -4.450424438901 | 4.375838561144  | -5.532765529026 |
| H  | -5.382750902654 | 2.480387381707  | -5.133214918377 |
| C  | -4.902824568724 | 5.322783565070  | -7.731589974338 |
| H  | -5.939731954302 | 4.097217376020  | -9.142861927884 |
| C  | -4.382440882930 | 5.430797023730  | -6.400930316045 |
| H  | -4.119358534303 | 4.497606100160  | -4.503699019134 |
| H  | -4.848564239731 | 6.176717917426  | -8.401023336944 |
| H  | -3.970592416782 | 6.380941806759  | -6.070587832020 |
| Si | -5.930943226102 | -0.258854531367 | -6.951950477381 |
| C  | -7.600227214868 | -1.177555559227 | -7.010649697075 |
| C  | -4.854838246091 | -0.992168854739 | -8.314059248876 |
| C  | -5.327707068793 | -0.399477782059 | -5.171603967384 |
| H  | -8.302239267559 | -0.848313524282 | -6.235786158672 |
| H  | -8.099843469881 | -1.100325629271 | -7.983799177711 |
| H  | -7.404348366588 | -2.243379850704 | -6.832233672100 |
| H  | -5.001863204252 | -0.471953027978 | -9.266729890137 |
| H  | -5.128883719237 | -2.045323681080 | -8.466895032314 |
| H  | -3.796152879557 | -0.929219472633 | -8.054809647454 |
| H  | -5.512570998965 | -1.424489529193 | -4.819551707711 |
| H  | -4.263363529202 | -0.171066073592 | -5.096895463252 |
| H  | -5.873249438867 | 0.275581954859  | -4.502901336159 |
| C  | -2.152271407946 | 1.069415282269  | -6.862091122628 |
| H  | -1.937235623042 | 1.657766233915  | -4.807831550899 |
| C  | -1.370310961636 | 1.781726249486  | -5.742076695231 |
| C  | -1.448162441111 | 1.054946414669  | -8.242315609358 |
| H  | -2.264889373825 | 0.013094944158  | -6.550361490577 |
| H  | -1.348271366160 | 2.865668208070  | -5.926689712833 |
| C  | 0.096546041864  | 1.316709506654  | -5.461716604426 |
| C  | -0.198909151249 | 0.130303509221  | -8.388178175134 |
| H  | -1.165437195529 | 2.080847895268  | -8.520375692380 |
| H  | -2.173452207583 | 0.739523649387  | -9.007249546760 |
| C  | 1.147142440861  | 2.051409338917  | -6.262139295169 |
| H  | 0.164471115839  | 0.232507500118  | -5.603894862214 |
| H  | 0.316808207168  | 1.492552964966  | -4.399832269255 |
| C  | 1.140942546534  | 0.863067398963  | -8.565282140280 |
| H  | -0.146344791964 | -0.554845057641 | -7.534672852542 |

|   |                 |                 |                 |
|---|-----------------|-----------------|-----------------|
| H | -0.322482728780 | -0.514200333527 | -9.270411463115 |
| C | 1.563411503155  | 1.869303374622  | -7.522273104128 |
| H | 1.115161898363  | 1.392265212984  | -9.531115330861 |
| H | 2.336326431814  | 2.554732353578  | -7.876606118647 |
| H | 1.607655090961  | 2.886000048988  | -5.729885056023 |
| H | 1.944501959811  | 0.116178314936  | -8.679798036618 |

51

**C1<sub>2</sub>** B3LYP/BSI Optimized geometry (charge = 0, singlet)

|    |               |               |               |
|----|---------------|---------------|---------------|
| Ni | 0.1161385245  | 0.2613664382  | -0.0137114773 |
| S  | -3.0309792785 | 0.0407993179  | -0.5906235054 |
| C  | -1.5621282661 | 1.1229111865  | -0.2750810533 |
| C  | -4.3785219536 | 0.5764806133  | 0.5457095769  |
| C  | -1.0308740789 | 1.2623240412  | 1.0989391104  |
| C  | -1.5976740311 | 2.2954916014  | -1.1315538828 |
| H  | -4.0485050212 | 0.5162442018  | 1.5845541657  |
| H  | -4.6017574188 | 1.6137729044  | 0.2885495916  |
| H  | -5.260542826  | -0.0467708041 | 0.3803240561  |
| C  | -0.6465308657 | 2.5957509435  | 1.5171122539  |
| H  | -1.43144538   | 0.634743618   | 1.8995422412  |
| C  | -1.0994411555 | 3.4937319646  | -0.6989196704 |
| H  | -1.9927322131 | 2.1987061264  | -2.1411695234 |
| C  | -0.6377431328 | 3.6519518146  | 0.6496761903  |
| H  | -0.3588629849 | 2.7441064276  | 2.5562038588  |
| H  | -1.0703659798 | 4.3416826214  | -1.3782692336 |
| H  | -0.314205629  | 4.6335314031  | 0.986177837   |
| Si | -2.55006568   | -2.087632305  | 0.0014758444  |
| C  | -4.2311285199 | -2.938789298  | -0.1279171663 |
| C  | -1.3628102313 | -2.6481888498 | -1.3374199242 |
| C  | -1.8365030099 | -2.2171723135 | 1.7312594624  |
| H  | -4.9329510381 | -2.6082095103 | 0.645785219   |
| H  | -4.6984184102 | -2.7891700257 | -1.1074205648 |
| H  | -4.086722571  | -4.0187132334 | 0.0062291149  |
| H  | -1.8003566073 | -2.5812284122 | -2.3392203387 |
| H  | -1.0673459624 | -3.689807651  | -1.1586678501 |
| H  | -0.4589466413 | -2.0302869254 | -1.3000016296 |
| H  | -1.7288435039 | -3.2793904262 | 1.9893301427  |
| H  | -0.8469517831 | -1.7501501216 | 1.7568126712  |
| H  | -2.4707230514 | -1.7523015948 | 2.4940441719  |
| C  | 1.8969609872  | -0.5191639418 | 0.2641549427  |
| H  | 2.1430264415  | 0.3111819629  | 2.2252953759  |
| C  | 2.6902304963  | 0.3313952163  | 1.271908848   |
| C  | 2.5695346672  | -0.6842853701 | -1.1236630414 |
| H  | 1.8214932125  | -1.5359944432 | 0.6968647917  |
| H  | 2.6929897005  | 1.3860632178  | 0.9611840192  |
| C  | 4.1688234682  | -0.0804675758 | 1.5741047919  |
| C  | 3.8304151378  | -1.6019071014 | -1.1937093449 |
| H  | 2.8278689668  | 0.3053854994  | -1.5286107371 |
| H  | 1.8343674942  | -1.0995869057 | -1.8317387826 |
| C  | 5.1925527115  | 0.567871656   | 0.6710822125  |
| H  | 4.2489573904  | -1.1731816586 | 1.5568314331  |
| H  | 4.4093987534  | 0.2198539524  | 2.6033851968  |
| C  | 5.1546755247  | -0.8756647896 | -1.4816472947 |
| H  | 3.9101805268  | -2.1853213458 | -0.2696774467 |
| H  | 3.7004671449  | -2.3437673739 | -1.9951229077 |
| C  | 5.5839736139  | 0.2481207113  | -0.5695355858 |
| H  | 5.1007172487  | -0.4599093276 | -2.5004988967 |
| H  | 6.3388757898  | 0.898011466   | -1.0176260447 |

|   |              |               |               |
|---|--------------|---------------|---------------|
| H | 5.6526566884 | 1.4637904297  | 1.0927724603  |
| H | 5.9672567361 | -1.6203180311 | -1.5291186782 |

51

**TS<sub>Clb</sub>** B3LYP/BSI Optimized geometry (charge = 0, singlet)

|    |                 |                 |                 |
|----|-----------------|-----------------|-----------------|
| Ni | -0.102368158103 | 0.068333455918  | -0.337816538680 |
| S  | -3.352147440992 | 0.163671629563  | -0.435843837913 |
| C  | -1.727200973359 | 1.064509794356  | -0.401786240380 |
| C  | -4.448937804838 | 0.885042549132  | 0.862497889010  |
| C  | -0.992835153071 | 1.172661470955  | 0.894700110512  |
| C  | -1.805661025845 | 2.252503697086  | -1.246088521166 |
| H  | -3.973519620089 | 0.817236382330  | 1.843010039808  |
| H  | -4.587190896528 | 1.933899814468  | 0.592553174671  |
| H  | -5.411802806692 | 0.368587736944  | 0.858434885838  |
| C  | -0.493241014798 | 2.489661862934  | 1.255252379805  |
| H  | -1.343118600888 | 0.588986738822  | 1.750172197686  |
| C  | -1.191909461459 | 3.415988918707  | -0.884491727616 |
| H  | -2.330839316090 | 2.183937228401  | -2.197641967923 |
| C  | -0.549214030502 | 3.547588017059  | 0.397306556020  |
| H  | -0.067746425763 | 2.618650043490  | 2.249198433329  |
| H  | -1.199989345083 | 4.263078896327  | -1.566186885950 |
| H  | -0.141172952390 | 4.512643470330  | 0.686755528429  |
| Si | -3.035360079629 | -1.975672033066 | 0.197186594666  |
| C  | -4.794526746207 | -2.634334770382 | 0.389697919265  |
| C  | -2.152866412143 | -2.739374922187 | -1.272203348061 |
| C  | -2.049542287805 | -2.128642177230 | 1.786477591735  |
| H  | -5.319905754357 | -2.189228209610 | 1.241793483235  |
| H  | -5.397160433534 | -2.474095886994 | -0.511028895577 |
| H  | -4.747525799352 | -3.716576588387 | 0.567109543971  |
| H  | -2.727668611395 | -2.645753857736 | -2.199619692590 |
| H  | -1.975102990998 | -3.805676982192 | -1.083890799808 |
| H  | -1.180616121785 | -2.256338615672 | -1.410953481650 |
| H  | -1.991877622660 | -3.189311841805 | 2.065772942061  |
| H  | -1.032987778405 | -1.753596879948 | 1.627339199181  |
| H  | -2.499173507119 | -1.586911446170 | 2.625609392105  |
| C  | 1.621677403384  | -0.763296860089 | -0.241639638449 |
| H  | 2.752360642202  | -0.121985578503 | 1.454581741071  |
| C  | 2.872565141362  | -0.137080826217 | 0.362073244383  |
| C  | 1.632129742460  | -0.880025261563 | -1.786235112150 |
| H  | 1.538527820826  | -1.788185576467 | 0.168679296097  |
| H  | 2.968588299846  | 0.914871577846  | 0.057725206887  |
| C  | 4.216557521634  | -0.869854699292 | 0.039014451212  |
| C  | 2.426537701590  | -2.079357673313 | -2.385693624302 |
| H  | 2.011249858019  | 0.053618559301  | -2.221675606543 |
| H  | 0.583475732070  | -0.953269854695 | -2.167812192232 |
| C  | 4.899014183600  | -0.411670049565 | -1.230487597164 |
| H  | 4.030707431531  | -1.950676701222 | 0.023591557285  |
| H  | 4.921527919927  | -0.698440181106 | 0.863978966414  |
| C  | 3.686843247491  | -1.666705916818 | -3.165938109421 |
| H  | 2.690492828465  | -2.771478039439 | -1.578335466342 |
| H  | 1.794395121089  | -2.654743594624 | -3.076930947246 |
| C  | 4.684314895523  | -0.735455003832 | -2.513617399059 |
| H  | 3.363581361316  | -1.178280363330 | -4.098558265225 |
| H  | 5.331071057401  | -0.240614069274 | -3.241331467442 |
| H  | 5.681971750758  | 0.331080207332  | -1.065431733391 |
| H  | 4.213965150469  | -2.576884360406 | -3.497138198363 |

33

**C1<sub>3</sub>** B3LYP/BSI Optimized geometry (charge = 0, singlet)

|    |               |               |               |
|----|---------------|---------------|---------------|
| Ni | -0.6613419345 | 1.4404592956  | 0.112678838   |
| C  | 0.7432041018  | 2.5362615865  | 0.6447542718  |
| C  | 0.8377222043  | 2.5687839481  | -0.7371217688 |
| C  | 1.6561874537  | 3.2791805337  | 1.3898339295  |
| C  | 1.7904064815  | 3.3055892867  | -1.4390760878 |
| H  | 0.0947747044  | 1.9616917587  | -1.364358949  |
| C  | 2.6321654385  | 4.0313788775  | 0.7207947499  |
| H  | 1.6252049718  | 3.2877027635  | 2.4779150093  |
| C  | 2.7005463133  | 4.0465339376  | -0.6774183413 |
| H  | 1.8352433462  | 3.3105017085  | -2.5253124954 |
| H  | 3.3490081888  | 4.6153303511  | 1.2946060376  |
| H  | 3.464455136   | 4.6372105749  | -1.1762468813 |
| C  | -2.0218520608 | 0.3157205463  | -0.6283653476 |
| H  | -2.7980539402 | 0.9308167476  | -2.546508944  |
| C  | -3.1642090296 | 0.7614359106  | -1.5246114715 |
| C  | -2.2478846441 | 0.3488202956  | 0.8368373306  |
| H  | -1.5899670024 | -0.6310084138 | -0.9791317579 |
| H  | -3.5754465    | 1.719693372   | -1.1778774035 |
| C  | -4.3133503361 | -0.2903792599 | -1.5951143561 |
| C  | -2.3192932053 | -0.9938393286 | 1.5811698704  |
| H  | -3.105618365  | 0.9725552828  | 1.0999036715  |
| H  | -1.3518961538 | 0.9402048975  | 1.4307371169  |
| C  | -5.1022315567 | -0.4519975118 | -0.3120493843 |
| H  | -3.8713075163 | -1.2508214537 | -1.8941188935 |
| H  | -5.0027968987 | -0.0053986337 | -2.4000742562 |
| C  | -3.4373334948 | -1.879837553  | 0.9716590022  |
| H  | -1.3622987499 | -1.5237438505 | 1.5036922443  |
| H  | -2.5047952709 | -0.8206080838 | 2.6493929193  |
| C  | -4.741884589  | -1.141268145  | 0.7807362506  |
| H  | -3.5874732634 | -2.7531510134 | 1.6190378383  |
| H  | -5.4187220292 | -1.1332531211 | 1.6358326411  |
| H  | -6.0574397159 | 0.0729751435  | -0.2795152908 |
| H  | -3.0833800836 | -2.2592064499 | 0.0061229076  |

51

**C2<sub>1</sub>** B3LYP/BSI Optimized geometry (charge = 0, singlet)

|    |               |               |               |
|----|---------------|---------------|---------------|
| Ni | -0.0568873558 | 0.2928739256  | -0.1180613792 |
| S  | -2.5853122212 | -0.5692699345 | -1.6367312546 |
| C  | -1.6018377955 | -0.8844353412 | -0.1292999286 |
| C  | -3.5395047145 | -2.1316151194 | -1.7964164001 |
| C  | -0.4848780832 | -1.9303783708 | -0.3233993196 |
| C  | -2.408431476  | -1.0218538552 | 1.0902118482  |
| H  | -4.1460082302 | -2.3084558924 | -0.9040011448 |
| H  | -4.1984149408 | -2.0122107234 | -2.6615800289 |
| H  | -2.8840333721 | -2.9912632559 | -1.9680336947 |
| C  | -0.335498723  | -2.9490088156 | 0.7696453849  |
| H  | -0.5561990369 | -2.4155312765 | -1.3063524813 |
| C  | -2.1666478886 | -1.9518762548 | 2.0451243042  |
| H  | -3.2306124973 | -0.3209933355 | 1.2092984507  |
| C  | -1.1119891454 | -2.9358554518 | 1.8697462158  |
| H  | 0.4096576942  | -3.7288149264 | 0.6248851829  |
| H  | -2.7758364697 | -1.9866889641 | 2.9441786602  |
| H  | -0.9799186891 | -3.6991721722 | 2.6334206398  |
| Si | -1.1041774334 | 2.1942973978  | 0.5321622977  |
| H  | 0.5186034022  | -1.3970994428 | -0.4284317193 |
| C  | -2.8897720556 | 2.5513035379  | -0.0245992231 |



|   |               |               |               |
|---|---------------|---------------|---------------|
| C | -1.0951052415 | 2.1946486373  | 2.4446172354  |
| C | -0.1332337405 | 3.7521044521  | -0.0213137641 |
| H | -3.2082129434 | 3.5188814085  | 0.3885845259  |
| H | -2.9678660049 | 2.6112789172  | -1.1155987307 |
| H | -3.6040534518 | 1.7918784165  | 0.3070372972  |
| H | -1.6179391282 | 1.3203962716  | 2.8492140324  |
| H | -1.5959921278 | 3.0935039525  | 2.8292683364  |
| H | -0.0760182969 | 2.1849195038  | 2.8504466583  |
| H | -0.5996303089 | 4.642996036   | 0.4209907215  |
| H | 0.9193227022  | 3.7523066619  | 0.2861717123  |
| H | -0.1639026791 | 3.8797991277  | -1.1105744997 |
| C | 1.7149218136  | 0.9559588146  | -0.9189668791 |
| C | 1.8411412722  | 0.8259033105  | 0.4583588782  |
| C | 2.2340721576  | 0.0606790084  | -2.0355918694 |
| H | 1.4787722103  | 1.9593565894  | -1.2692809396 |
| C | 2.5155901514  | -0.2712107771 | 1.2607827107  |
| H | 1.734743971   | 1.7496774109  | 1.026408165   |
| C | 3.2465644175  | -1.0449265853 | -1.6627618905 |
| H | 2.7162790495  | 0.7261012293  | -2.7652266496 |
| H | 1.3914650836  | -0.3914925303 | -2.5805173736 |
| C | 4.0399945252  | -0.06708519   | 1.384130994   |
| H | 2.3051845631  | -1.2687226693 | 0.8707233586  |
| H | 2.0919784434  | -0.2589514893 | 2.2727790454  |
| C | 4.5549069632  | -0.5095398102 | -1.1191642615 |
| H | 2.7909265079  | -1.7668570426 | -0.9794301414 |
| H | 3.4607111272  | -1.608146814  | -2.5793438918 |
| C | 4.864230974   | -0.1076669512 | 0.1203796275  |
| H | 4.2240492895  | 0.9016202687  | 1.8724419697  |
| H | 4.4351395905  | -0.8173532153 | 2.0874589001  |
| H | 5.3458210634  | -0.4179749383 | -1.8641322986 |
| H | 5.8845390784  | 0.2500332673  | 0.268345611   |

51

TS<sub>C2a</sub> B3LYP/BSI Optimized geometry (charge = 0, singlet)

|    |               |               |               |
|----|---------------|---------------|---------------|
| Ni | 0.3075652781  | -0.7022797771 | -0.4628560655 |
| S  | -2.4181806866 | 0.1643428377  | -1.1453509452 |
| C  | -1.6967920418 | -1.0038117151 | -0.0130549339 |
| C  | -4.1902599616 | -0.3984317712 | -1.4739069403 |
| C  | -1.0292651894 | -2.1595390621 | -0.5903137274 |
| C  | -2.2233953561 | -1.1188869964 | 1.3297463356  |
| H  | -4.7664987049 | -0.3972441462 | -0.5465385286 |
| H  | -4.6232982749 | 0.2999937144  | -2.1951987759 |
| H  | -4.1606236154 | -1.4045142397 | -1.9008643007 |
| C  | -0.9326799311 | -3.3599913803 | 0.2134848542  |
| H  | -1.0854570401 | -2.3026739247 | -1.6704413359 |
| C  | -2.0543928628 | -2.2591756183 | 2.0611463292  |
| H  | -2.7844278051 | -0.2881231849 | 1.7497227851  |
| C  | -1.3958579266 | -3.4035542221 | 1.494242133   |
| H  | -0.4772080783 | -4.2378016289 | -0.2381319582 |
| H  | -2.4530806507 | -2.3155377373 | 3.070726291   |
| H  | -1.3022835431 | -4.3113455639 | 2.0839197474  |
| Si | -1.5548314164 | 1.9780146341  | 0.294683443   |
| H  | 1.2014052009  | -1.8430575715 | -0.8023950326 |
| C  | -3.2944911274 | 2.6974625392  | 0.5978381744  |
| C  | -0.7938226938 | 1.9959159227  | 2.040222704   |
| C  | -0.7274602947 | 3.1429520163  | -0.949105322  |
| H  | -3.2054018648 | 3.672574043   | 1.0958806568  |
| H  | -3.8473095416 | 2.8466557556  | -0.3369453397 |

|   |               |               |               |
|---|---------------|---------------|---------------|
| H | -3.9050413434 | 2.0564267187  | 1.2457777063  |
| H | -1.219746058  | 1.1980128223  | 2.6567265466  |
| H | -1.0529591205 | 2.9530420558  | 2.5152002077  |
| H | 0.2904858093  | 1.8826968734  | 2.0578592563  |
| H | -0.772204712  | 4.168446905   | -0.5573417423 |
| H | 0.3184304836  | 2.9110296981  | -1.1636962721 |
| H | -1.2796899347 | 3.1273732911  | -1.8953201323 |
| C | 1.7774412126  | 0.3507098071  | -1.3278174705 |
| C | 1.7030063919  | 0.7107841901  | 0.0266218417  |
| C | 2.8839272176  | -0.3396483375 | -2.1134613293 |
| H | 1.2162211457  | 1.0192241227  | -1.9895183746 |
| C | 2.5406920018  | 0.1647681735  | 1.1653694159  |
| H | 1.2401721313  | 1.6673621645  | 0.2461781693  |
| C | 4.0279222636  | -1.0100183812 | -1.3287607756 |
| H | 3.3275207181  | 0.4319825558  | -2.7632094394 |
| H | 2.4290897494  | -1.0750314222 | -2.7873012823 |
| C | 3.8837898491  | 0.8872724274  | 1.3875374972  |
| H | 2.7020211046  | -0.908538327  | 1.0438654219  |
| H | 1.9584906823  | 0.270615011   | 2.0909485703  |
| C | 5.0255376306  | -0.0237854977 | -0.7556497187 |
| H | 3.6071167187  | -1.6773774819 | -0.5716844276 |
| H | 4.5676349802  | -1.6603445196 | -2.0279896429 |
| C | 4.952184062   | 0.7532430502  | 0.3326488418  |
| H | 3.6874495544  | 1.9609692155  | 1.5354377074  |
| H | 4.3049279303  | 0.5452432961  | 2.3470102793  |
| H | 5.9289800571  | 0.0917675342  | -1.3562529385 |
| H | 5.8099686027  | 1.4036351314  | 0.5157418364  |

51

**C2<sub>2</sub>** B3LYP/BSI Optimized geometry (charge = 0, singlet)

|    |               |               |               |
|----|---------------|---------------|---------------|
| Ni | 0.4159977567  | -0.9111396431 | -0.996418849  |
| S  | -2.4750578059 | 0.4013117401  | -0.4226464607 |
| C  | -1.1383783978 | -0.8491273305 | 0.1139719779  |
| C  | -3.991771389  | -0.0742812845 | 0.5098755155  |
| C  | -1.153843873  | -2.0064045508 | -0.815857806  |
| C  | -1.1467619825 | -1.1188120674 | 1.5443667119  |
| H  | -3.8216263602 | -0.0207532253 | 1.5866554076  |
| H  | -4.8222410473 | 0.5676387516  | 0.2101536216  |
| H  | -4.1990682122 | -1.1083480888 | 0.2276194945  |
| C  | -1.1593866749 | -3.3288223575 | -0.2246136248 |
| H  | -1.6939500796 | -1.9207306208 | -1.7595045095 |
| C  | -1.0595107708 | -2.3967350346 | 2.0150245668  |
| H  | -1.1620052905 | -0.2848193586 | 2.2430521252  |
| C  | -1.0752309916 | -3.5244239473 | 1.1226577644  |
| H  | -1.2479293166 | -4.18198772   | -0.8946978666 |
| H  | -0.9813488896 | -2.5676605011 | 3.0866144077  |
| H  | -1.0585471349 | -4.5291620585 | 1.53615426    |
| Si | -2.0859082639 | 2.5341963694  | 0.1885921745  |
| H  | 0.8936624921  | -1.8479794852 | -2.0711280054 |
| C  | -3.8027724233 | 3.298788353   | 0.3706487744  |
| C  | -1.1281931878 | 2.6393068495  | 1.8010420934  |
| C  | -1.1864438446 | 3.2750323741  | -1.2854185774 |
| H  | -3.6873554753 | 4.3773535068  | 0.540014759   |
| H  | -4.4114819115 | 3.1735783115  | -0.5316791889 |
| H  | -4.3575734897 | 2.8923638928  | 1.2228584133  |
| H  | -1.6855881522 | 2.2039236036  | 2.6375073369  |
| H  | -0.9448849346 | 3.6954343562  | 2.0389277343  |
| H  | -0.1601088698 | 2.1360958821  | 1.7325212022  |

|   |               |               |               |
|---|---------------|---------------|---------------|
| H | -0.9150685549 | 4.3161739092  | -1.0685876462 |
| H | -0.2681671121 | 2.7329146754  | -1.5280912212 |
| H | -1.8279958774 | 3.2718452566  | -2.173444085  |
| C | 2.0597301621  | 0.0680972206  | -1.5076566138 |
| C | 1.5473991428  | 0.5653445985  | -0.2840813477 |
| C | 3.3744911286  | -0.6483153308 | -1.8003872262 |
| H | 1.7684857552  | 0.6644415118  | -2.3780955836 |
| C | 2.0553765256  | 0.262407842   | 1.1166173633  |
| H | 1.0472653119  | 1.5350360327  | -0.3411728133 |
| C | 4.1628173519  | -1.2545996952 | -0.6189494422 |
| H | 4.0379027068  | 0.0803845336  | -2.293480716  |
| H | 3.1797803854  | -1.4335959729 | -2.5375837111 |
| C | 3.2803160069  | 1.0758603192  | 1.5735376198  |
| H | 2.2563969981  | -0.8037067083 | 1.2497613424  |
| H | 1.2415856207  | 0.4737450981  | 1.8234385599  |
| C | 4.9925027573  | -0.2326833337 | 0.1334869876  |
| H | 3.4849712442  | -1.8137010473 | 0.0329309661  |
| H | 4.8541233888  | -2.0002042502 | -1.0304124087 |
| C | 4.6258976496  | 0.7276840158  | 0.991870689   |
| H | 3.0910336939  | 2.1461881365  | 1.3871036448  |
| H | 3.363142299   | 0.9937423058  | 2.6704890397  |
| H | 6.0542617301  | -0.2557684245 | -0.1174503474 |
| H | 5.4269182059  | 1.3723815905  | 1.360774497   |

51

**TS<sub>C2b</sub>** B3LYP/BSI Optimized geometry (charge = 0, singlet)

|    |               |               |               |
|----|---------------|---------------|---------------|
| Ni | -0.7482032725 | 0.858640014   | -0.9359996464 |
| S  | 2.4363318042  | 0.3389316609  | -0.6055360213 |
| C  | 0.8382879307  | 1.1792571232  | 0.0695524773  |
| C  | 3.8236481239  | 1.1913853566  | 0.2551029896  |
| C  | 0.49323793    | 2.3250036009  | -0.806429049  |
| C  | 0.8845093388  | 1.4052750522  | 1.5055566181  |
| H  | 3.7430080956  | 1.073628721   | 1.3372547883  |
| H  | 4.7766091008  | 0.8065033346  | -0.1126985491 |
| H  | 3.724839052   | 2.2480806751  | -0.0009913162 |
| C  | 0.2103831472  | 3.5902656995  | -0.1624019656 |
| H  | 0.9588741755  | 2.4012768733  | -1.7896478042 |
| C  | 0.5136902889  | 2.6074873417  | 2.0359385175  |
| H  | 1.1580207219  | 0.584455085   | 2.165345099   |
| C  | 0.1799928332  | 3.7244440959  | 1.1951482037  |
| H  | 0.0333917379  | 4.4547405422  | -0.7996888656 |
| H  | 0.471952473   | 2.7244632587  | 3.1168323224  |
| H  | -0.0576209379 | 4.6812950501  | 1.6519715241  |
| Si | 2.6861127704  | -1.8297691976 | -0.0572706896 |
| H  | -1.5444034555 | 1.6635054993  | -1.9255378812 |
| C  | 4.5537675095  | -2.1041411385 | -0.0115824186 |
| C  | 1.9072994257  | -2.2261811482 | 1.6058181804  |
| C  | 1.916001331   | -2.7577072424 | -1.4985270243 |
| H  | 4.7456719543  | -3.1765940018 | 0.1238405583  |
| H  | 5.0410890905  | -1.8004318547 | -0.9446681672 |
| H  | 5.0368514879  | -1.5789498043 | 0.8191379356  |
| H  | 2.0366574828  | -3.29619264   | 1.8153378339  |
| H  | 0.8360201815  | -2.0079556478 | 1.6149060897  |
| H  | 2.3799187959  | -1.6698292902 | 2.4225580544  |
| H  | 1.9561089232  | -3.837789172  | -1.3076325628 |
| H  | 0.8688905635  | -2.4844971228 | -1.6572226312 |
| H  | 2.4635579507  | -2.5587698279 | -2.4262951175 |
| C  | -2.1017212842 | -0.5145463031 | -1.3926198581 |

|   |               |               |               |
|---|---------------|---------------|---------------|
| C | -1.3837869708 | -0.8931567841 | -0.231984172  |
| C | -3.5791816573 | -0.1752591287 | -1.5636004524 |
| H | -1.7256927544 | -0.9779103458 | -2.3101276759 |
| C | -1.8483743404 | -0.7892291809 | 1.211956776   |
| H | -0.6432227712 | -1.6841491194 | -0.371915655  |
| C | -4.4110192188 | 0.153213393   | -0.3046497737 |
| H | -4.0559247619 | -1.0408662036 | -2.0510912757 |
| H | -3.6597893627 | 0.6571482835  | -2.2696994125 |
| C | -2.7701274866 | -1.9219558126 | 1.7000738142  |
| H | -2.3196755745 | 0.1759651018  | 1.4144169569  |
| H | -0.9570879304 | -0.7946823827 | 1.8537916998  |
| C | -4.8754773636 | -1.0808086987 | 0.4439548392  |
| H | -3.8623626638 | 0.8540568509  | 0.3316175544  |
| H | -5.3066295402 | 0.695208343   | -0.6320836468 |
| C | -4.1998400496 | -1.9337055081 | 1.2247355996  |
| H | -2.313790328  | -2.8926462824 | 1.4437958125  |
| H | -2.788708587  | -1.9044669085 | 2.8028928216  |
| H | -5.9201543886 | -1.3391157668 | 0.2630159989  |
| H | -4.7673710203 | -2.7842908925 | 1.6091181661  |

33

**C<sub>23</sub>** B3LYP/BSI Optimized geometry (charge = 0, singlet)

|    |               |               |               |
|----|---------------|---------------|---------------|
| Ni | -1.1448044988 | 1.0994452344  | -0.7942476674 |
| C  | -0.1780307908 | 1.7416720886  | 0.6381144689  |
| C  | 0.1365420125  | 2.6897197181  | -0.3205966142 |
| C  | 0.3796821768  | 1.832988756   | 1.9073865723  |
| C  | 1.001717217   | 3.7550001492  | -0.0743223359 |
| H  | -0.316429913  | 2.6083315942  | -1.356396714  |
| C  | 1.2516825433  | 2.8963448037  | 2.184171157   |
| H  | 0.1570075802  | 1.1014840602  | 2.6817811311  |
| C  | 1.5594398446  | 3.8478621637  | 1.2060024768  |
| H  | 1.2368840872  | 4.4894624783  | -0.8402501178 |
| H  | 1.6977113967  | 2.9824313135  | 3.1726236213  |
| H  | 2.237618542   | 4.6642639583  | 1.439187741   |
| H  | -1.6103317701 | 1.0864648227  | -2.2157158854 |
| C  | -2.3756831116 | -0.4229133186 | -1.1503477219 |
| C  | -1.8632123903 | -0.4524550008 | 0.1701536281  |
| C  | -3.821884014  | -0.0811412728 | -1.5210919842 |
| H  | -1.8999735784 | -1.105856188  | -1.8510922946 |
| C  | -2.7216035723 | -0.243148149  | 1.4000895619  |
| H  | -1.0252851266 | -1.1304940056 | 0.3401911158  |
| C  | -4.9264868941 | -0.8233757047 | -0.7043904338 |
| H  | -3.9400562938 | -0.3070409522 | -2.5868055235 |
| H  | -4.0088676846 | 0.9925933631  | -1.4264344658 |
| C  | -3.3110516222 | -1.5907871883 | 1.9030788665  |
| H  | -3.5168243269 | 0.4788788899  | 1.1963409312  |
| H  | -2.1277760145 | 0.1866933584  | 2.2140116762  |
| C  | -4.5789355526 | -2.2178576331 | -0.24507443   |
| H  | -5.1915321248 | -0.2159396089 | 0.1668745352  |
| H  | -5.8303752239 | -0.8594633902 | -1.3248102054 |
| C  | -3.9046446809 | -2.5287951933 | 0.8691637077  |
| H  | -2.507246329  | -2.1366690598 | 2.4150576514  |
| H  | -4.0555974123 | -1.3762826285 | 2.6860771845  |
| H  | -4.9086013327 | -3.0375818937 | -0.8834466448 |
| H  | -3.7488601424 | -3.587657565  | 1.0775460119  |

**C3<sub>1</sub>** B3LYP/BSI Optimized geometry (charge = 0, singlet)

|    |               |               |               |
|----|---------------|---------------|---------------|
| Ni | -1.1448044988 | 1.0994452344  | -0.7942476674 |
| C  | -0.1780307908 | 1.7416720886  | 0.6381144689  |
| C  | 0.1365420125  | 2.6897197181  | -0.3205966142 |
| C  | 0.3796821768  | 1.832988756   | 1.9073865723  |
| C  | 1.001717217   | 3.7550001492  | -0.0743223359 |
| H  | -0.316429913  | 2.6083315942  | -1.356396714  |
| C  | 1.2516825433  | 2.8963448037  | 2.184171157   |
| H  | 0.1570075802  | 1.1014840602  | 2.6817811311  |
| C  | 1.5594398446  | 3.8478621637  | 1.2060024768  |
| H  | 1.2368840872  | 4.4894624783  | -0.8402501178 |
| H  | 1.6977113967  | 2.9824313135  | 3.1726236213  |
| H  | 2.237618542   | 4.6642639583  | 1.439187741   |
| H  | -1.6103317701 | 1.0864648227  | -2.2157158854 |
| C  | -2.3756831116 | -0.4229133186 | -1.1503477219 |
| C  | -1.8632123903 | -0.4524550008 | 0.1701536281  |
| C  | -3.821884014  | -0.0811412728 | -1.5210919842 |
| H  | -1.8999735784 | -1.105856188  | -1.8510922946 |
| C  | -2.7216035723 | -0.243148149  | 1.4000895619  |
| H  | -1.0252851266 | -1.1304940056 | 0.3401911158  |
| C  | -4.9264868941 | -0.8233757047 | -0.7043904338 |
| H  | -3.9400562938 | -0.3070409522 | -2.5868055235 |
| H  | -4.0088676846 | 0.9925933631  | -1.4264344658 |
| C  | -3.3110516222 | -1.5907871883 | 1.9030788665  |
| H  | -3.5168243269 | 0.4788788899  | 1.1963409312  |
| H  | -2.1277760145 | 0.1866933584  | 2.2140116762  |
| C  | -4.5789355526 | -2.2178576331 | -0.24507443   |
| H  | -5.1915321248 | -0.2159396089 | 0.1668745352  |
| H  | -5.8303752239 | -0.8594633902 | -1.3248102054 |
| C  | -3.9046446809 | -2.5287951933 | 0.8691637077  |
| H  | -2.507246329  | -2.1366690598 | 2.4150576514  |
| H  | -4.0555974123 | -1.3762826285 | 2.6860771845  |
| H  | -4.9086013327 | -3.0375818937 | -0.8834466448 |
| H  | -3.7488601424 | -3.587657565  | 1.0775460119  |

51

**TS<sub>C3</sub>** B3LYP/BSI Optimized geometry (charge = 0, singlet)

|    |               |               |               |
|----|---------------|---------------|---------------|
| Ni | 0.343225118   | 0.4936718117  | 0.5221184286  |
| S  | -1.5842786981 | 0.0080906004  | -0.5633683201 |
| C  | -0.9662004678 | 1.817571653   | -1.0348206252 |
| C  | -1.5012862786 | -0.8795109092 | -2.1574974309 |
| C  | -1.9721940769 | 2.8431329393  | -0.899594996  |
| C  | -0.0858718171 | 1.9355638033  | -2.1629852715 |
| H  | -1.3622172191 | -0.1403225796 | -2.9534646739 |
| H  | -0.6855907039 | -1.6022835239 | -2.1738292293 |
| H  | -2.4556064023 | -1.3935561648 | -2.2927545457 |
| C  | -1.9874743659 | 3.9398350956  | -1.7403759948 |
| H  | -2.711726011  | 2.748112508   | -0.1099507935 |
| C  | -0.1404953837 | 3.0499777678  | -2.9957493433 |
| H  | 0.659915988   | 1.1671439971  | -2.3429341684 |
| C  | -1.0735725799 | 4.0691635446  | -2.8000855437 |
| H  | -2.749116119  | 4.7013290336  | -1.5870739152 |
| H  | 0.5655332621  | 3.1130746708  | -3.821120611  |
| H  | -1.1081230731 | 4.9285796081  | -3.4616248266 |
| Si | 1.2900643442  | -1.6131403111 | 0.4489076497  |
| H  | -0.2905278509 | 1.8733882531  | 0.1127705962  |
| C  | -0.0306437345 | -2.9950809073 | 0.5716016899  |
| C  | 2.1603044464  | -1.7447522607 | -1.2601108159 |

|   |               |               |               |
|---|---------------|---------------|---------------|
| C | 2.6387441567  | -2.2138536174 | 1.6671225621  |
| H | 0.4204960358  | -3.9747470142 | 0.3623832594  |
| H | -0.4406180527 | -3.0351403296 | 1.5887770302  |
| H | -0.8766311455 | -2.8662910012 | -0.1119697421 |
| H | 1.5255791226  | -1.4718393232 | -2.1112087086 |
| H | 2.5160738991  | -2.7707179827 | -1.4284468906 |
| H | 3.0379146873  | -1.0861180798 | -1.2892277606 |
| H | 3.0248640735  | -3.1825382773 | 1.3211656897  |
| H | 3.4950301835  | -1.5326764491 | 1.7394256657  |
| H | 2.2435417912  | -2.3668477491 | 2.6777217161  |
| C | 1.7560011383  | 0.9820307292  | 1.8782666871  |
| C | 1.2048881898  | 2.1451583035  | 1.2962396975  |
| C | 1.5070949036  | 0.5353893646  | 3.3220134387  |
| H | 2.7335999534  | 0.695828853   | 1.4963793437  |
| C | 0.3891539114  | 3.1796346962  | 2.0489422837  |
| H | 1.7726161111  | 2.5735093359  | 0.4644755264  |
| C | 1.6174441421  | 1.6418192712  | 4.4203126481  |
| H | 2.2349990991  | -0.2487599184 | 3.5457798272  |
| H | 0.5226124026  | 0.0657590473  | 3.4335295852  |
| C | 1.3021999779  | 4.2673964759  | 2.6770800103  |
| H | -0.2305201323 | 2.7001599267  | 2.8108717857  |
| H | -0.3052014983 | 3.6888276419  | 1.3676258508  |
| C | 2.6716774027  | 2.6933468463  | 4.1801721113  |
| H | 0.6443182827  | 2.1253296381  | 4.5477786873  |
| H | 1.8206790167  | 1.1363359458  | 5.3726127677  |
| C | 2.5217186206  | 3.8044987346  | 3.4487810464  |
| H | 1.654124332   | 4.9161022711  | 1.8637283518  |
| H | 0.6799233928  | 4.9173273419  | 3.3127507617  |
| H | 3.6431148762  | 2.5206100218  | 4.6434796129  |
| H | 3.3761239694  | 4.4789922972  | 3.3855461864  |

39

**C3<sub>2</sub>** B3LYP/BSI Optimized geometry (charge = 0, singlet)

|    |               |               |               |
|----|---------------|---------------|---------------|
| Ni | 0.0442140441  | -1.0198470788 | 0.7686640652  |
| S  | -1.921117508  | -1.8388037992 | 0.7923397726  |
| C  | -2.8019885832 | -1.6473510755 | -0.8172285773 |
| H  | -3.5329908105 | -0.8397284811 | -0.7257179088 |
| H  | -2.1200939733 | -1.4117944985 | -1.6364547211 |
| H  | -3.3281721809 | -2.5760804165 | -1.0527721593 |
| Si | 1.0325864868  | -2.6500320473 | -0.3776870014 |
| C  | 0.0197820071  | -3.4692044052 | -1.7583887394 |
| C  | 2.5930148827  | -1.981715766  | -1.2531153652 |
| C  | 1.5566313594  | -3.9970182424 | 0.8578139346  |
| H  | 0.6505025871  | -4.2005408895 | -2.2827551174 |
| H  | -0.8547597368 | -3.9902681506 | -1.3582384994 |
| H  | -0.32639209   | -2.7462829336 | -2.50603439   |
| H  | 2.3350419183  | -1.2458257541 | -2.024288051  |
| H  | 3.0973372287  | -2.8169357945 | -1.7586374287 |
| H  | 3.322060941   | -1.5198908469 | -0.5783061116 |
| H  | 2.1105233474  | -4.7867477036 | 0.3317711285  |
| H  | 2.2049431153  | -3.6096119208 | 1.6517689965  |
| H  | 0.6809970067  | -4.4555232365 | 1.329558685   |
| C  | 1.6892565121  | -0.4009069309 | 1.7518984269  |
| C  | 1.2762600521  | 0.5259442724  | 0.7900729566  |
| C  | 1.4030486981  | -0.4555146676 | 3.2467033195  |
| H  | 2.5571303024  | -0.9979261804 | 1.4768580556  |
| C  | 0.3886890992  | 1.7470750375  | 0.9679302922  |
| H  | 1.8790227537  | 0.5594870897  | -0.1183233308 |

|   |               |               |               |
|---|---------------|---------------|---------------|
| C | 0.7001660878  | 0.7545832612  | 3.8989756285  |
| H | 2.3713622122  | -0.5959796202 | 3.748102316   |
| H | 0.826890101   | -1.364624623  | 3.4779978878  |
| C | 1.1334658308  | 2.9842768141  | 1.5115573008  |
| H | -0.4803376683 | 1.5284070358  | 1.5933143079  |
| H | -0.0184860054 | 2.0093594998  | -0.0166692761 |
| C | 1.5357286463  | 2.0173301905  | 3.8823549995  |
| H | -0.2852077045 | 0.9061555343  | 3.4509528956  |
| H | 0.5046582921  | 0.4875310543  | 4.9444816745  |
| C | 1.7143148978  | 2.9113654647  | 2.9017666179  |
| H | 1.9508687892  | 3.2303606357  | 0.8171936973  |
| H | 0.4499898872  | 3.8467957727  | 1.4613382576  |
| H | 2.0940320921  | 2.1971909542  | 4.8015777807  |
| H | 2.3820270821  | 3.7449634458  | 3.1258206804  |

51

**C4<sub>1</sub>** B3LYP/BSI Optimized geometry (charge = 0, singlet)

|    |               |               |               |
|----|---------------|---------------|---------------|
| Ni | 0.3225002657  | -0.1814320468 | 0.7438277808  |
| S  | -1.3190475636 | -1.4838794576 | 0.0384199704  |
| C  | -2.8011201415 | -0.7610252134 | -0.6853371722 |
| C  | -0.9024610493 | -2.7167645171 | -1.2485912739 |
| C  | -3.9763206959 | -0.7582972657 | 0.0741261956  |
| C  | -2.7924271264 | -0.1720542287 | -1.9566621543 |
| H  | -1.7495206237 | -3.3922242291 | -1.3896044382 |
| H  | -0.6354364675 | -2.2450336941 | -2.196775023  |
| H  | -0.0438391896 | -3.2776787757 | -0.8735994699 |
| C  | -5.135442691  | -0.1688746116 | -0.4352428811 |
| H  | -3.9789117304 | -1.2180122077 | 1.0578858205  |
| C  | -3.9572566593 | 0.4022291202  | -2.4666203962 |
| H  | -1.8785132855 | -0.1572637946 | -2.5436144542 |
| C  | -5.129873333  | 0.408250429   | -1.7062154154 |
| H  | -6.0443930532 | -0.1682958194 | 0.1601894034  |
| H  | -3.9457160337 | 0.8544453743  | -3.4547272762 |
| H  | -6.0336101446 | 0.8619874398  | -2.1032817645 |
| Si | -0.3821617774 | 2.114493585   | 0.9757394084  |
| H  | -0.6281696782 | 0.6847355233  | 1.6371493262  |
| C  | 0.5230048419  | 3.1497478617  | 2.2750908865  |
| C  | 0.2431644415  | 2.47081204    | -0.7890354962 |
| C  | -2.1984837608 | 2.6643433429  | 0.9434510065  |
| H  | 0.4388719885  | 4.218818453   | 2.0405360903  |
| H  | 0.070691014   | 2.9917509663  | 3.2616217763  |
| H  | 1.5847999712  | 2.9018652814  | 2.3520431152  |
| H  | 1.2795110412  | 2.1771219462  | -0.9731435563 |
| H  | 0.159474168   | 3.5508704786  | -0.9778069167 |
| H  | -0.3909153943 | 1.9637698084  | -1.5249172364 |
| H  | -2.2761772775 | 3.7279265794  | 0.6824896373  |
| H  | -2.7661349384 | 2.0976098569  | 0.1973379312  |
| H  | -2.6911244869 | 2.5246809886  | 1.913043394   |
| C  | 2.2169035485  | -0.1523354037 | 1.2687439828  |
| C  | 1.9262286082  | -1.2016936279 | 0.3436214665  |
| C  | 3.1929333439  | 1.0130395572  | 1.0513868592  |
| H  | 2.2247404953  | -0.4795472042 | 2.3122818835  |
| C  | 2.4939420805  | -1.283564858  | -1.0630363913 |
| H  | 1.8010600331  | -2.196731555  | 0.7890883809  |
| C  | 4.4585896739  | 0.7413892127  | 0.1836493832  |
| H  | 3.5300845661  | 1.3353732232  | 2.0453010735  |
| H  | 2.7069273489  | 1.8940640324  | 0.6160116183  |
| C  | 3.8212062449  | -2.0855135626 | -1.1225989559 |

|   |              |               |               |
|---|--------------|---------------|---------------|
| H | 2.6255184961 | -0.2833723893 | -1.4857303981 |
| H | 1.7864912881 | -1.7897751801 | -1.7348528165 |
| C | 5.1642318349 | -0.562358753  | 0.4559215214  |
| H | 4.1934302264 | 0.8017405446  | -0.8761171069 |
| H | 5.1570416053 | 1.5709636731  | 0.3578909582  |
| C | 4.8937496368 | -1.7452712609 | -0.1083627522 |
| H | 3.5733020501 | -3.1481005957 | -0.9871318289 |
| H | 4.2362624452 | -2.0183540622 | -2.1420167361 |
| H | 5.9661673911 | -0.5286783233 | 1.1943635161  |
| H | 5.5144024525 | -2.591344681  | 0.1900225242  |

51

**TS<sub>C4</sub>** B3LYP/BSI Optimized geometry (charge = 0, singlet)

|    |               |               |               |
|----|---------------|---------------|---------------|
| Ni | -0.0609131996 | -0.166242833  | 0.3479980827  |
| S  | -1.3766406051 | -2.1600648648 | 0.5294625483  |
| C  | -2.4801657874 | -0.4809959282 | 0.02016928    |
| C  | -1.5162273221 | -3.1333480982 | -1.005468272  |
| C  | -3.5199075418 | -0.2335835799 | 0.9756906076  |
| C  | -2.8342418394 | -0.3636527094 | -1.3579861757 |
| H  | -2.4579202647 | -2.8765561031 | -1.5026564065 |
| H  | -0.6830403847 | -2.9600541643 | -1.69260074   |
| H  | -1.5317486804 | -4.1877339895 | -0.7185088508 |
| C  | -4.7905398584 | 0.132402583   | 0.5685562089  |
| H  | -3.29704617   | -0.3429769092 | 2.0329217571  |
| C  | -4.1266679271 | -0.0016429146 | -1.7361887307 |
| H  | -2.0772345725 | -0.5142443843 | -2.1219058922 |
| C  | -5.1205580772 | 0.2495167124  | -0.7910772384 |
| H  | -5.5484547467 | 0.3118695709  | 1.32779292    |
| H  | -4.3491128768 | 0.0898221179  | -2.7971741947 |
| H  | -6.1229515798 | 0.5308515183  | -1.097311957  |
| Si | -0.045910613  | 2.1236046876  | 0.322167197   |
| H  | -1.5085964076 | 0.3748160523  | 0.3057679185  |
| C  | -1.1757695817 | 2.7959186918  | 1.7101235813  |
| C  | 1.6009097057  | 3.0706400099  | 0.5620788065  |
| C  | -0.7239345208 | 2.7276872785  | -1.3584007104 |
| H  | -1.2547780413 | 3.8902465882  | 1.6556396388  |
| H  | -2.190533081  | 2.38463266    | 1.6494081223  |
| H  | -0.7751091888 | 2.5444372602  | 2.7006036547  |
| H  | 2.0852102368  | 2.8580105838  | 1.5213928984  |
| H  | 1.375476832   | 4.1462142905  | 0.5467026025  |
| H  | 2.3296612612  | 2.8866159745  | -0.2352426327 |
| H  | -0.839223863  | 3.8200641802  | -1.3570411532 |
| H  | -0.0396389601 | 2.4699716657  | -2.1767638775 |
| H  | -1.7012098142 | 2.2890996828  | -1.590685779  |
| C  | 1.7471673465  | -0.9259471232 | 1.0579596002  |
| C  | 1.7105334499  | -0.9620470697 | -0.3273384763 |
| C  | 2.6498262734  | -0.1176376413 | 1.9761035267  |
| H  | 1.3182869654  | -1.7966798671 | 1.5529746733  |
| C  | 2.5479291197  | -0.1571306322 | -1.292718362  |
| H  | 1.3137665173  | -1.8803594393 | -0.7668650778 |
| C  | 3.9926744715  | 0.386468864   | 1.392447805   |
| H  | 2.8763089409  | -0.7690136469 | 2.8308444416  |
| H  | 2.1074017809  | 0.7366032235  | 2.4011370406  |
| C  | 3.8896212241  | -0.8560139685 | -1.6160004031 |
| H  | 2.7183617362  | 0.8526752648  | -0.9226453156 |
| H  | 1.9963084261  | -0.0432091586 | -2.2353341805 |
| C  | 4.8500959907  | -0.6994250432 | 0.7818121585  |
| H  | 3.8137321104  | 1.1925313326  | 0.6792371876  |



|   |              |               |               |
|---|--------------|---------------|---------------|
| H | 4.5482822011 | 0.8463485301  | 2.2195350858  |
| C | 4.8020626315 | -1.1988381268 | -0.4598835676 |
| H | 3.6695385606 | -1.7916929975 | -2.1505426662 |
| H | 4.4385594727 | -0.237070051  | -2.3434125995 |
| H | 5.5936514841 | -1.1320365807 | 1.4518601995  |
| H | 5.5289067665 | -1.9762654986 | -0.6997592839 |

39

**C4<sub>2</sub>** B3LYP/BSI Optimized geometry (charge = 0, singlet)

|    |               |               |               |
|----|---------------|---------------|---------------|
| Ni | -0.6986941821 | -0.7093491863 | 0.7789376024  |
| S  | 0.9284973166  | -1.9124880965 | 1.4371182985  |
| C  | 1.3731165038  | -0.5699247849 | 2.6311681287  |
| H  | 2.1327767257  | 0.0966395277  | 2.2138898217  |
| H  | 0.5060177407  | 0.02988741    | 2.938266804   |
| H  | 1.7735781702  | -1.0397206654 | 3.5341778164  |
| Si | -0.5677530975 | -1.8258920686 | -1.1635750114 |
| C  | -0.0391905562 | -3.6459452727 | -1.0630418891 |
| C  | -2.2944613867 | -1.9036605443 | -1.972754283  |
| C  | 0.613671878   | -0.9012380087 | -2.3281885924 |
| H  | -0.1301519894 | -4.0986536324 | -2.0601249549 |
| H  | 0.9945727284  | -3.7639781027 | -0.7267918484 |
| H  | -0.6817998471 | -4.2147039621 | -0.381668998  |
| H  | -2.9937778218 | -2.4965225682 | -1.3723633495 |
| H  | -2.1815531704 | -2.4173629212 | -2.9380140822 |
| H  | -2.7551427731 | -0.9326200414 | -2.1734972483 |
| H  | 0.6361343149  | -1.4031601716 | -3.3053743164 |
| H  | 0.3130107707  | 0.1385518699  | -2.494808064  |
| H  | 1.6307083365  | -0.9022181106 | -1.9224564239 |
| C  | -2.37575493   | 0.2656557228  | 1.2253535591  |
| C  | -1.5084834812 | 1.0901221228  | 0.4952303268  |
| C  | -3.7716849409 | -0.2266981687 | 0.8646111597  |
| H  | -2.2099487164 | 0.2783771574  | 2.309445026   |
| C  | -1.7562741279 | 1.7309163463  | -0.8526374475 |
| H  | -0.8010889789 | 1.674269737   | 1.0973412481  |
| C  | -4.5778332442 | 0.6354947398  | -0.1391036066 |
| H  | -4.3405941365 | -0.2772501032 | 1.8018577837  |
| H  | -3.7417520008 | -1.2566766583 | 0.487412379   |
| C  | -2.5063482284 | 3.0777915073  | -0.7251760611 |
| H  | -2.286803809  | 1.0589259363  | -1.5272948283 |
| H  | -0.7906852668 | 1.9367804373  | -1.3319750071 |
| C  | -4.6953006434 | 2.0924744522  | 0.2450624485  |
| H  | -4.1589510868 | 0.5312236781  | -1.1423554056 |
| H  | -5.5853335101 | 0.2044206272  | -0.1969694958 |
| C  | -3.8367853115 | 3.0890549947  | -0.0061329909 |
| H  | -1.8463718043 | 3.7860628871  | -0.2031885664 |
| H  | -2.6348477769 | 3.5027778385  | -1.7336098718 |
| H  | -5.591902007  | 2.3509953704  | 0.8092476309  |
| H  | -4.1230556602 | 4.0786257048  | 0.3532743089  |

31

**N1<sub>1</sub>** B3LYP/BSI Optimized geometry (charge = 0, singlet)

|    |               |              |               |
|----|---------------|--------------|---------------|
| Ni | -0.6067224775 | 0.3050266874 | 0.2586399303  |
| S  | 1.5915795458  | 1.5688923264 | -2.427116411  |
| C  | 0.7437777758  | 1.6301317705 | -0.8612273339 |
| C  | 2.6448447759  | 0.0856553367 | -2.25645973   |
| C  | -0.5478187148 | 2.2071171401 | -0.8351482712 |
| C  | 1.2938291951  | 1.1698429887 | 0.3637966597  |

|    |               |               |               |
|----|---------------|---------------|---------------|
| H  | 2.0490566055  | -0.7768614929 | -1.9453126158 |
| H  | 3.0571709344  | -0.1025828626 | -3.2511676655 |
| H  | 3.4725392964  | 0.246260642   | -1.5608907848 |
| C  | -1.2319861112 | 2.4090423535  | 0.3866888221  |
| H  | -1.0237497128 | 2.4907539145  | -1.7677924135 |
| C  | 0.5979695105  | 1.3631790745  | 1.586113027   |
| H  | 2.2640012676  | 0.6877807187  | 0.384681631   |
| C  | -0.6550562056 | 2.0155161804  | 1.6082392635  |
| H  | -2.2241961659 | 2.8472152779  | 0.369269828   |
| H  | 1.0444698415  | 1.0059115915  | 2.5077609746  |
| H  | -1.1806563947 | 2.169866656   | 2.5440078848  |
| Si | -0.678604737  | -1.8750613697 | 0.6417837028  |
| H  | -1.6807761356 | -0.5879980978 | -0.2335293521 |
| C  | 0.9096262712  | -2.2318076253 | 1.6604947735  |
| C  | -2.1019433352 | -2.4775883187 | 1.7503973548  |
| C  | -0.5281318256 | -3.0103610927 | -0.8783358204 |
| H  | 0.9656521115  | -3.3035748115 | 1.8982658951  |
| H  | 1.8225318819  | -1.970506937  | 1.1116571724  |
| H  | 0.9220106282  | -1.6850494442 | 2.611038832   |
| H  | -2.1568245982 | -1.8729015572 | 2.6646263205  |
| H  | -1.9515787235 | -3.5216416489 | 2.0550133579  |
| H  | -3.0744124017 | -2.4083343856 | 1.24952915    |
| H  | -0.3720082787 | -4.0547196077 | -0.5776120459 |
| H  | -1.4198079749 | -2.9714257263 | -1.5144801353 |
| H  | 0.3294981517  | -2.7172306806 | -1.4980410004 |

31

TS<sub>N1</sub> B3LYP/BSI Optimized geometry (charge = 0, singlet)

|    |               |               |               |
|----|---------------|---------------|---------------|
| Ni | 0.180948968   | 0.5021072883  | 0.0681419997  |
| S  | 2.5564647023  | -0.1128341571 | -0.9941430181 |
| C  | 1.9336870801  | 1.2364579153  | 0.0151158466  |
| C  | 4.4177594612  | -0.0563799298 | -0.8854777681 |
| C  | 0.9811352105  | 2.1084531766  | -0.6535426239 |
| C  | 2.5822887631  | 1.6543990679  | 1.2230719734  |
| H  | 4.7709825128  | -0.2201672286 | 0.1337741658  |
| H  | 4.8029701036  | -0.8361490413 | -1.5455373381 |
| H  | 4.7297240345  | 0.9279639588  | -1.2422892359 |
| C  | 0.6535267723  | 3.3302036778  | 0.0206235755  |
| H  | 0.8659744117  | 2.0855634356  | -1.737717702  |
| C  | 2.2106176154  | 2.8361790911  | 1.8200748981  |
| H  | 3.3498308364  | 1.0316426238  | 1.6752400323  |
| C  | 1.2221441626  | 3.6698315618  | 1.227942239   |
| H  | -0.0383589318 | 4.0170861521  | -0.4617561369 |
| H  | 2.6812827548  | 3.1390049412  | 2.7516595652  |
| H  | 0.9483768704  | 4.6014809405  | 1.715231183   |
| Si | 1.5775714233  | -1.9659453124 | 0.084845353   |
| H  | -0.9269810561 | -0.507255968  | 0.3903622025  |
| C  | 3.145354673   | -3.0543176007 | -0.0680387213 |
| C  | 1.2569762112  | -1.8753496389 | 1.9475550234  |
| C  | 0.3161492864  | -2.7842453888 | -1.0569076776 |
| H  | 2.8981703554  | -4.0583320482 | 0.3034624462  |
| H  | 3.4898935199  | -3.1724840933 | -1.1031052011 |
| H  | 3.9877839388  | -2.6894893261 | 0.5319039722  |
| H  | 1.7279823542  | -0.9955618238 | 2.3972934484  |
| H  | 1.6662679436  | -2.7686531729 | 2.4398252149  |
| H  | 0.1835625958  | -1.7986824148 | 2.132129084   |
| H  | 0.5578870338  | -3.8474312884 | -1.1888945967 |
| H  | -0.6881400329 | -2.6725289437 | -0.6429084892 |

H 0.3175944256 -2.3121264543 -2.0452697141

31

**N1<sub>2</sub>** B3LYP/BSI Optimized geometry (charge = 0, singlet)

|    |               |               |               |
|----|---------------|---------------|---------------|
| Ni | 0.6041445293  | 0.559796528   | 0.1409310518  |
| S  | 1.4749779583  | -1.02449233   | -1.1855511274 |
| C  | -0.2580272036 | 2.067106203   | 0.7136519343  |
| C  | 3.3079259123  | -1.1943776987 | -1.0761800929 |
| C  | 0.0324450232  | 3.1319534895  | -0.1620250199 |
| C  | -1.2197614149 | 2.2944051262  | 1.7112064073  |
| H  | 3.6329579327  | -1.2980762487 | -0.0392073273 |
| H  | 3.6326187003  | -2.0551191197 | -1.6648412731 |
| H  | 3.7403579847  | -0.2870229655 | -1.5019013209 |
| C  | -0.618398374  | 4.3654390136  | -0.0611787897 |
| H  | 0.7848142954  | 3.0099855416  | -0.945384106  |
| C  | -1.8728729427 | 3.5251476581  | 1.8206700638  |
| H  | -1.46089965   | 1.5022518459  | 2.4160804176  |
| C  | -1.5762378596 | 4.5648368016  | 0.9346836713  |
| H  | -0.3750948542 | 5.1694934049  | -0.7532513296 |
| H  | -2.6170116723 | 3.6752238446  | 2.6007601839  |
| H  | -2.0835131945 | 5.52259911    | 1.0235507658  |
| Si | 0.7043093021  | -2.9022176147 | -0.3096777499 |
| H  | 0.7051200863  | 0.1516856547  | 1.511242634   |
| C  | 1.2176509758  | -4.3242954219 | -1.4389527915 |
| C  | 1.3976729193  | -3.1221651596 | 1.4257654985  |
| C  | -1.1609503601 | -2.6654229894 | -0.2888177758 |
| H  | 0.8214628327  | -5.2707119706 | -1.0487729903 |
| H  | 0.8271639478  | -4.1884730877 | -2.4532732309 |
| H  | 2.3066831573  | -4.4290273343 | -1.5048852951 |
| H  | 2.4874022067  | -3.2391896996 | 1.4296816062  |
| H  | 0.9707969549  | -4.0228274246 | 1.885876495   |
| H  | 1.1432937732  | -2.2614227646 | 2.0519956168  |
| H  | -1.6439788118 | -3.5575103416 | 0.1299585606  |
| H  | -1.44024252   | -1.8056257941 | 0.3287063418  |
| H  | -1.5640936348 | -2.5083962564 | -1.2953780284 |

31

**N2<sub>1</sub>** B3LYP/BSI Optimized geometry (charge = 0, singlet)

|    |               |               |               |
|----|---------------|---------------|---------------|
| Ni | -0.1235917541 | -0.3013828542 | 0.2452198666  |
| C  | 0.9326909314  | -2.1273668275 | 0.2352219168  |
| C  | 0.9062302706  | -1.5717080442 | -1.0671629193 |
| C  | 1.4422905887  | -1.3632364723 | 1.3081728584  |
| C  | 1.3795459738  | -0.2597186811 | -1.3044680133 |
| H  | 0.4949162985  | -2.1483108684 | -1.8884561491 |
| C  | 1.8936083401  | -0.0489291623 | 1.0748819002  |
| H  | 1.4693826382  | -1.7732018729 | 2.3120996553  |
| C  | 1.8703849873  | 0.5154934951  | -0.2284689164 |
| H  | 1.3467495055  | 0.1632127861  | -2.3023736362 |
| H  | -1.0703825815 | 0.6637725631  | 0.8509827919  |
| H  | 2.2558769674  | 0.5446638439  | 1.9068424051  |
| Si | -2.3265890457 | -0.3860131764 | -0.0115273799 |
| H  | -3.3229742345 | 0.0691501115  | 2.2685605034  |
| C  | -3.1205729666 | 1.0604359239  | -0.9567943767 |
| C  | -2.6007719405 | -1.9101459931 | -1.144308393  |
| C  | -3.3306372826 | -0.7657452725 | 1.5583815067  |
| H  | -4.1617957164 | 0.8346067156  | -1.221864586  |
| H  | -3.115109759  | 1.9902836736  | -0.3762064814 |

|   |               |               |               |
|---|---------------|---------------|---------------|
| H | -2.5771698106 | 1.2505418298  | -1.8910862191 |
| H | -2.131134807  | -1.782047249  | -2.1269072287 |
| H | -3.6771177373 | -2.0577935529 | -1.3119437153 |
| H | -2.2080726834 | -2.8328488873 | -0.7005504643 |
| H | -4.3767214038 | -0.9919676104 | 1.3134982669  |
| H | -2.9165352167 | -1.6419537561 | 2.0734265307  |
| H | 0.560056073   | -3.131729992  | 0.4038132602  |
| S | 2.4894203554  | 2.1586605562  | -0.5685011189 |
| C | 1.5855145     | 3.1548294079  | 0.6765028468  |
| H | 1.7478180406  | 4.2016988198  | 0.4061136144  |
| H | 0.5180456437  | 2.9246046017  | 0.6342526717  |
| H | 1.9656718256  | 2.9887659445  | 1.6876080028  |

39

**TS<sub>N2a</sub>** B3LYP/BSI Optimized geometry (charge = 0, singlet)

|    |               |               |               |
|----|---------------|---------------|---------------|
| Ni | -0.053896127  | 0.0899416982  | 0.2753894311  |
| C  | 2.1200270291  | -2.5052085325 | 0.1147907906  |
| C  | 2.3892087432  | -1.7447255091 | -1.0727627365 |
| C  | 1.6375745862  | -1.9206084484 | 1.2482320177  |
| C  | 2.2265188634  | -0.3879903781 | -1.1394948659 |
| H  | 2.7393103003  | -2.2685367499 | -1.957292559  |
| C  | 1.3735823404  | -0.4796088285 | 1.3248000288  |
| H  | 1.4386517509  | -2.5079565111 | 2.140255372   |
| C  | 1.756493457   | 0.4355725883  | -0.023080513  |
| H  | 2.4513425954  | 0.146841914   | -2.057393694  |
| H  | 1.3594239634  | 0.0019290298  | 2.305365041   |
| H  | 2.4996596757  | -0.0685254919 | 0.9684209769  |
| Si | -2.3991753549 | -0.0869441596 | 0.3019670082  |
| H  | -2.9014317893 | 1.0715635272  | 2.5011900841  |
| C  | -3.2507535819 | 1.2968642493  | -0.7340428333 |
| C  | -3.1160373573 | -1.7264910324 | -0.393873738  |
| C  | -3.1673112169 | 0.1045525045  | 2.0544317411  |
| H  | -4.3451235012 | 1.2050477668  | -0.6888726244 |
| H  | -2.9922236149 | 2.2981243295  | -0.3643457252 |
| H  | -2.9616569308 | 1.2532914054  | -1.792049912  |
| H  | -2.8180719209 | -1.8758034749 | -1.4396569882 |
| H  | -4.2144319797 | -1.7366976149 | -0.3571617799 |
| H  | -2.7580375015 | -2.5954490116 | 0.1730154933  |
| H  | -4.2643304623 | 0.0478749753  | 2.0186874673  |
| H  | -2.8194048757 | -0.6784035169 | 2.7405201594  |
| H  | 2.301685457   | -3.5755858385 | 0.1013732025  |
| S  | 2.3239937898  | 2.1500861654  | 0.0391208788  |
| C  | 0.7945569238  | 3.0621588454  | 0.4789269106  |
| H  | 1.0815950107  | 4.1178833272  | 0.5008914216  |
| H  | 0.0199752215  | 2.9107860499  | -0.2734726738 |
| H  | 0.4215285066  | 2.7682777219  | 1.4618276182  |

31

**N2<sub>2a</sub>** B3LYP/BSI Optimized geometry (charge = 0, singlet)

|    |               |               |               |
|----|---------------|---------------|---------------|
| Ni | -0.3304337975 | -0.8930598218 | -0.0116398862 |
| C  | 1.2894183174  | -2.1940064167 | -0.4258593524 |
| C  | 1.7174481173  | -1.3078460033 | -1.5057380174 |
| C  | 1.2329468964  | -1.7015447171 | 0.8875040322  |
| C  | 2.1184103707  | -0.0345001878 | -1.2776204827 |
| H  | 1.7003817774  | -1.6970956628 | -2.5215848057 |
| C  | 1.2184140199  | -0.2680936346 | 1.0297502211  |
| H  | 1.001594983   | -2.3632064702 | 1.719660995   |

|    |               |               |               |
|----|---------------|---------------|---------------|
| C  | 2.1994296488  | 0.4934508193  | 0.1382975442  |
| H  | 2.4801019355  | 0.5912278599  | -2.088737191  |
| H  | 1.0981450631  | 0.1401200363  | 2.0292861115  |
| H  | 3.2236146847  | 0.327068989   | 0.5217879506  |
| Si | -2.1862233253 | 0.1101110648  | 0.3839549378  |
| H  | -3.0511943952 | 0.4873201537  | 2.7094360064  |
| C  | -2.91708366   | 1.6547527559  | -0.4487291301 |
| C  | -2.2934951807 | -1.3786796868 | -0.8849333124 |
| C  | -3.2145051913 | -0.2733832449 | 1.9363908095  |
| H  | -3.9970556471 | 1.5422914112  | -0.612675051  |
| H  | -2.7743537745 | 2.5492292154  | 0.1694066756  |
| H  | -2.4443424299 | 1.843396469   | -1.4189601699 |
| H  | -1.3433075193 | -1.9353745522 | -1.1137126107 |
| H  | -2.6376195383 | -1.0118687826 | -1.8555635496 |
| H  | -2.9681391318 | -2.1588140465 | -0.5216603941 |
| H  | -4.2894792434 | -0.2917444674 | 1.7138469885  |
| H  | -2.9390891585 | -1.2427587391 | 2.3668671883  |
| H  | 1.1743238872  | -3.2545010378 | -0.6274291421 |
| S  | 2.1428138287  | 2.3388398128  | 0.2613384836  |
| C  | 0.6149079914  | 2.7982513378  | -0.6228880936 |
| H  | 0.591040229   | 3.8918464875  | -0.6329377546 |
| H  | 0.6255354376  | 2.4347055913  | -1.6547379392 |
| H  | -0.2716951955 | 2.4216454675  | -0.1127120616 |

31

**N2<sub>2b</sub>** B3LYP/BSI Optimized geometry (charge = 0, singlet)

|    |               |               |               |
|----|---------------|---------------|---------------|
| Ni | -0.1687360841 | -1.088023258  | 0.2592193463  |
| C  | 1.6053670519  | -2.0956295948 | -0.3221982129 |
| C  | 1.6909997528  | -1.3085837042 | -1.5526545488 |
| C  | 1.6681357757  | -1.4289333119 | 0.9105554377  |
| C  | 1.8021705946  | 0.0391562111  | -1.5434022019 |
| H  | 1.6531030839  | -1.8398765205 | -2.5013087918 |
| C  | 1.3464389296  | -0.02802243   | 0.9083948043  |
| H  | 1.743004674   | -1.9857425357 | 1.8422522389  |
| C  | 1.851272388   | 0.8216250557  | -0.2503822781 |
| H  | 1.8977663591  | 0.5879313552  | -2.4764975772 |
| H  | 1.3166658529  | 0.4835657597  | 1.8661759867  |
| H  | 2.8790266741  | 1.1743536683  | -0.0524036976 |
| Si | -2.0581766366 | -0.1531650296 | 0.6566788473  |
| H  | -2.7793041898 | 0.5680860816  | 2.9477627659  |
| C  | -2.8820934196 | 1.2139067912  | -0.3665932058 |
| C  | -2.1386812702 | -1.8525033087 | -0.3125100146 |
| C  | -2.9584968813 | -0.3152285985 | 2.3229054107  |
| H  | -3.9656904507 | 1.0589913558  | -0.4542144156 |
| H  | -2.7209394196 | 2.1930143785  | 0.0987537148  |
| H  | -2.4534985789 | 1.259324508   | -1.3731183481 |
| H  | -1.1584972885 | -2.3805425264 | -0.5030573203 |
| H  | -2.5670522994 | -1.7134262575 | -1.3083741445 |
| H  | -2.7207017671 | -2.5914407747 | 0.244905076   |
| H  | -4.0442692039 | -0.4086745679 | 2.1888526937  |
| H  | -2.6076517973 | -1.1901921211 | 2.8817645155  |
| H  | 1.7172911455  | -3.1739369214 | -0.3769552508 |
| S  | 0.8434367987  | 2.3859934979  | -0.337474249  |
| C  | 2.058250018   | 3.5097251739  | -1.1153447908 |
| H  | 2.9541628746  | 3.6225806897  | -0.4962970768 |
| H  | 2.3461388981  | 3.1702724829  | -2.1155085447 |
| H  | 1.5720344153  | 4.4848034514  | -1.2091071684 |

31

**TS<sub>N2b</sub>** B3LYP/BSI Optimized geometry (charge = 0, singlet)

|    |               |               |               |
|----|---------------|---------------|---------------|
| Ni | -0.6287740369 | -0.3455628487 | -0.2872516477 |
| C  | 1.1054614193  | -1.707678632  | -0.6823096654 |
| C  | 2.168916955   | -0.9875565981 | -1.3673652131 |
| C  | 0.7948779116  | -1.2980004842 | 0.6379737544  |
| C  | 2.5337095018  | 0.2598283435  | -0.9901941078 |
| H  | 2.7129300111  | -1.5053464829 | -2.155547899  |
| C  | 0.8808311073  | 0.0981734755  | 0.9144973078  |
| H  | 0.4430463603  | -1.9955524127 | 1.3945089222  |
| C  | 1.6718663485  | 0.9995029689  | -0.0326273464 |
| H  | 3.3828220061  | 0.7695563982  | -1.4345202311 |
| H  | 0.7410940786  | 0.453946409   | 1.930463724   |
| H  | 2.2047378041  | 1.7931229049  | 0.4950743564  |
| Si | -2.5383505854 | 0.0806780051  | 0.5955263048  |
| H  | -3.1242860801 | -0.6560257336 | 2.9232730062  |
| C  | -3.4522862933 | 1.7434472082  | 0.5879870748  |
| C  | -2.6291910673 | -0.7548734008 | -1.1609480429 |
| C  | -3.3237709418 | -1.0405181254 | 1.9155355704  |
| H  | -4.5389656582 | 1.6160963715  | 0.4932545156  |
| H  | -3.266063443  | 2.2906578233  | 1.5200071102  |
| H  | -3.1015881079 | 2.3733424057  | -0.2362732566 |
| H  | -1.6485855509 | -0.9822330825 | -1.6644221387 |
| H  | -3.1455209188 | -0.0923555851 | -1.8607668371 |
| H  | -3.1394546671 | -1.7203561814 | -1.113162588  |
| H  | -4.4140537029 | -1.0987165176 | 1.7975288532  |
| H  | -2.9221450885 | -2.0589786545 | 1.8651895415  |
| H  | 0.9378557453  | -2.7446697884 | -0.9589949229 |
| S  | 0.2465494652  | 1.9114456077  | -1.0183599537 |
| C  | 0.9809562825  | 2.3393494005  | -2.6415197788 |
| H  | 1.7263647237  | 3.1341089274  | -2.544938357  |
| H  | 1.4306619681  | 1.4601762043  | -3.1085076871 |
| H  | 0.1580249738  | 2.7006785742  | -3.2646613482 |

31

**N<sub>23</sub>** B3LYP/BSI Optimized geometry (charge = 0, singlet)

|    |               |               |               |
|----|---------------|---------------|---------------|
| Ni | 0.344367165   | 0.0091583891  | 0.0339057834  |
| C  | 1.7087352341  | -1.8034284335 | -0.5108163331 |
| C  | 2.6908276479  | -0.8234304949 | -0.6636716252 |
| C  | 0.9455090654  | -1.8499526513 | 0.6824722268  |
| C  | 2.9654813403  | 0.0884354162  | 0.3805548554  |
| H  | 3.2469045703  | -0.7551100564 | -1.5932219781 |
| C  | 1.1981150651  | -0.9080285656 | 1.7125735737  |
| H  | 0.2141832153  | -2.6353921379 | 0.8318888054  |
| C  | 2.2400136792  | 0.0404543685  | 1.5682055318  |
| H  | 3.725131912   | 0.8500634658  | 0.238716977   |
| H  | 0.6483586612  | -0.9688581029 | 2.6452472282  |
| H  | 2.448242543   | 0.7419371677  | 2.3693688905  |
| Si | -1.8474558049 | 0.0399304254  | 0.4276873883  |
| H  | -1.6912994647 | -1.4039892385 | 2.5461673125  |
| C  | -2.4009145742 | 1.5903654625  | 1.3773633254  |
| C  | -2.9801536459 | -0.2784216812 | -1.0660099642 |
| C  | -2.2568354587 | -1.4215126048 | 1.6069504842  |
| H  | -3.4611887608 | 1.5037216279  | 1.6518931704  |
| H  | -1.8308725919 | 1.7092937679  | 2.3071580128  |
| H  | -2.2705232355 | 2.4966058797  | 0.7793712443  |
| H  | -2.9940141768 | 0.5705581751  | -1.7553774105 |

|   |               |               |               |
|---|---------------|---------------|---------------|
| H | -4.0069782165 | -0.4576226373 | -0.7191356593 |
| H | -2.6677755724 | -1.1695639169 | -1.6249138569 |
| H | -3.3213505821 | -1.3582016768 | 1.8730880075  |
| H | -2.103822451  | -2.4003224794 | 1.1361211924  |
| H | 1.5216991251  | -2.5220063566 | -1.3021365679 |
| S | -0.1163270959 | 1.6994350617  | -1.2358428443 |
| C | -0.083698072  | 0.980180738   | -2.930676311  |
| H | -0.2377262672 | 1.800041687   | -3.6385609042 |
| H | 0.87539588    | 0.5035542233  | -3.1547643783 |
| H | -0.8867121334 | 0.250488178   | -3.0715501769 |

47

**T1<sub>1</sub>** B3LYP/BSI Optimized geometry (charge = 0, singlet)

|    |               |               |               |
|----|---------------|---------------|---------------|
| Ni | -0.29626522   | 0.4875323947  | -0.1587845545 |
| S  | -3.3337874597 | 0.5918810492  | 0.6699244533  |
| C  | -2.0184950169 | 1.3894647226  | -0.2986373178 |
| C  | -4.5356577367 | 1.9675202935  | 0.8435933667  |
| C  | -1.0287479359 | 2.2096071751  | 0.3990581037  |
| C  | -2.3494960581 | 1.7599284873  | -1.6593734415 |
| H  | -4.0963762857 | 2.8004226967  | 1.399834411   |
| H  | -4.8692605857 | 2.3180709374  | -0.136779381  |
| H  | -5.3940024125 | 1.5763613402  | 1.3981067752  |
| C  | -0.5121003735 | 3.3803285085  | -0.2710055286 |
| H  | -1.0668428812 | 2.2474186442  | 1.4897578687  |
| C  | -1.7615317758 | 2.8331256374  | -2.2773223348 |
| H  | -3.0949032456 | 1.1657794606  | -2.183267549  |
| C  | -0.8403165219 | 3.6658235898  | -1.5704894385 |
| H  | 0.1304644533  | 4.0615269806  | 0.2855292031  |
| H  | -2.0189510841 | 3.0729981174  | -3.3061833944 |
| H  | -0.4303978398 | 4.5460232744  | -2.0592239339 |
| Si | -0.8020221164 | -2.0379237763 | -0.5992914216 |
| C  | -2.4226028124 | -2.3508091405 | -1.5090571785 |
| C  | 0.5146620096  | -3.285642162  | -1.1372098838 |
| C  | -1.0038832581 | -2.2221837926 | 1.2744682963  |
| H  | -3.2042484765 | -1.6627889755 | -1.1723884286 |
| H  | -2.2964145934 | -2.2256493868 | -2.5909569923 |
| H  | -2.7697496154 | -3.3767209877 | -1.330379165  |
| H  | 0.708968395   | -3.2420767187 | -2.2152507592 |
| H  | 0.191199534   | -4.307538853  | -0.9003253654 |
| H  | 1.4618921252  | -3.1066643919 | -0.6177403526 |
| H  | -1.3583156042 | -3.2425065025 | 1.4801054226  |
| H  | -0.0435963503 | -2.1031215506 | 1.7874301613  |
| H  | -1.724669647  | -1.5248924535 | 1.7097137758  |
| H  | -0.20843858   | -0.7295381703 | -1.1989223527 |
| S  | 1.8431339735  | 0.7181837843  | 0.3051976241  |
| C  | 2.8815613107  | -0.7174328938 | 0.6225009361  |
| C  | 2.1489398709  | 1.6961425875  | 1.8219536786  |
| C  | 2.860661915   | -1.4156239674 | 1.8369652105  |
| C  | 3.7117919301  | -1.1563414742 | -0.4159866843 |
| H  | 1.7079271195  | 1.2325101469  | 2.7073479874  |
| H  | 3.2250718501  | 1.8248334088  | 1.9586312242  |
| H  | 1.6803723181  | 2.6679787045  | 1.6576355239  |
| C  | 3.6738720875  | -2.5365770547 | 2.0105834072  |
| H  | 2.2121386687  | -1.0901708175 | 2.6448103949  |
| C  | 4.5113358566  | -2.2874554775 | -0.2416213914 |
| H  | 3.7318170199  | -0.6077905514 | -1.3531279782 |
| C  | 4.497764297   | -2.9776814483 | 0.9720937814  |
| H  | 3.6559732453  | -3.0706735965 | 2.956839155   |

|   |              |               |               |
|---|--------------|---------------|---------------|
| H | 5.152682563  | -2.6219300143 | -1.0525024737 |
| H | 5.1257359439 | -3.8534447842 | 1.10929054    |

47

**TS<sub>T1</sub>** B3LYP/BSI Optimized geometry (charge = 0, singlet)

|    |               |               |               |
|----|---------------|---------------|---------------|
| Ni | -0.4505069493 | 0.5389192026  | -0.2182267554 |
| S  | 2.2110879797  | -0.0335328016 | -1.2937359558 |
| C  | 1.4934865269  | 0.9773996115  | -0.0140040472 |
| C  | 3.946986266   | 0.605609553   | -1.6831930858 |
| C  | 0.6674112659  | 2.1138794764  | -0.4206098797 |
| C  | 2.1587068824  | 1.0506854742  | 1.2745626866  |
| H  | 4.5767344461  | 0.5656662953  | -0.7922464095 |
| H  | 4.3596023375  | -0.0266268133 | -2.4743579217 |
| H  | 3.8569787196  | 1.6360688577  | -2.0378599853 |
| C  | 0.5816866949  | 3.2464403951  | 0.4785034991  |
| H  | 0.5813753817  | 2.3442361098  | -1.48413653   |
| C  | 1.9856881455  | 2.1203936982  | 2.103224394   |
| H  | 2.8239918692  | 0.2437796227  | 1.5729634348  |
| C  | 1.1851755091  | 3.2451452739  | 1.6996605154  |
| H  | 0.0179848028  | 4.1148667763  | 0.1453106042  |
| H  | 2.4895097402  | 2.1402695931  | 3.066555969   |
| H  | 1.0956964951  | 4.1014368488  | 2.3626662442  |
| Si | 1.6328244946  | -1.9613047302 | 0.0545736186  |
| H  | -1.6308058828 | 1.4819360077  | -0.3719804304 |
| C  | 3.435058416   | -2.5334339057 | 0.2949368406  |
| C  | 0.853616168   | -2.1331248221 | 1.7815811367  |
| C  | 0.8526736552  | -3.1266301906 | -1.213389078  |
| H  | 3.4386676664  | -3.5350852491 | 0.7459446494  |
| H  | 3.9788829172  | -2.5909846251 | -0.6553843311 |
| H  | 4.0033864105  | -1.8750864075 | 0.9633997316  |
| H  | 1.0335346071  | -1.2524537894 | 2.4052696069  |
| H  | 1.2961669108  | -3.0025025879 | 2.2887886282  |
| H  | -0.2249225217 | -2.2907445075 | 1.7033504912  |
| H  | 1.044055285   | -4.1643173584 | -0.906545551  |
| H  | -0.2287415323 | -2.9969440922 | -1.2971487715 |
| H  | 1.2969700866  | -2.985701765  | -2.2044935372 |
| S  | -1.8489165374 | -1.1653944355 | -0.1378179308 |
| C  | -2.7455651683 | -1.2518463889 | -1.7033430382 |
| C  | -3.1948432748 | -0.6088738082 | 0.9762270293  |
| C  | -3.3975700664 | -2.4451590648 | -2.0348480767 |
| C  | -2.7692322177 | -0.1636239913 | -2.5807212496 |
| H  | -3.5475626516 | 0.3745514047  | 0.6602787111  |
| H  | -3.9999479332 | -1.3477505355 | 0.967908497   |
| H  | -2.7686118621 | -0.5392107303 | 1.9805459262  |
| C  | -4.088648438  | -2.5422566859 | -3.2438897256 |
| H  | -3.3600163497 | -3.2896917991 | -1.3521746873 |
| C  | -3.4585192541 | -0.2707833132 | -3.7894512815 |
| H  | -2.2539590087 | 0.7462365222  | -2.2884078006 |
| C  | -4.1186856678 | -1.4560506403 | -4.1218280863 |
| H  | -4.5972998322 | -3.4673372513 | -3.5015717123 |
| H  | -3.4784178983 | 0.5741378146  | -4.4727300694 |
| H  | -4.6528284837 | -1.5355762277 | -5.0649599262 |

29

**T1<sub>2</sub>** B3LYP/BSI Optimized geometry (charge = 0, singlet)

|    |               |              |               |
|----|---------------|--------------|---------------|
| Ni | 1.180098349   | 1.7091750066 | -0.3062873832 |
| C  | -0.3424963314 | 2.4016008342 | -0.9727908214 |



|   |               |               |               |
|---|---------------|---------------|---------------|
| C | -0.6870399682 | 2.8443224583  | 0.3081484109  |
| C | -1.227145807  | 2.6225162792  | -2.0270499435 |
| C | -1.8920141737 | 3.4985626221  | 0.5696049498  |
| H | 0.0161302702  | 2.6776135365  | 1.1508648417  |
| C | -2.439922467  | 3.2781419347  | -1.7811322084 |
| H | -0.9833433993 | 2.2912946107  | -3.0333762057 |
| C | -2.7735971985 | 3.7140451774  | -0.4942262184 |
| H | -2.1433600907 | 3.8373334063  | 1.5722467727  |
| H | -3.1339380011 | 3.4505448851  | -2.6012617768 |
| H | -3.7186655396 | 4.2220835993  | -0.3203913723 |
| H | 1.7107154998  | 1.2957721042  | -1.5818894173 |
| S | 2.9092907603  | 1.0066754934  | 0.9102231976  |
| C | 3.2493475623  | -0.7195368639 | 0.5226952887  |
| C | 2.4182996256  | 0.8600965701  | 2.6735372168  |
| C | 4.3564164713  | -1.3498911155 | 1.1023120671  |
| C | 2.4401486149  | -1.4039840358 | -0.388278863  |
| H | 1.5383605455  | 0.2227557418  | 2.7864881457  |
| H | 3.2506211684  | 0.4536442001  | 3.2515401007  |
| H | 2.1952247067  | 1.8691333824  | 3.0310517499  |
| C | 4.6309068845  | -2.6819566334 | 0.7924222973  |
| H | 5.0012775985  | -0.80348691   | 1.7850176308  |
| C | 2.7306400076  | -2.7324702479 | -0.7030998831 |
| H | 1.6128314971  | -0.8771678264 | -0.8507283119 |
| C | 3.8187516896  | -3.3745359153 | -0.1097648104 |
| H | 5.4867332417  | -3.1743398619 | 1.2459075631  |
| H | 2.1026497989  | -3.2635863364 | -1.4128877572 |
| H | 4.0401366845  | -4.409636096  | -0.35463926   |

47

**T2<sub>1</sub>** B3LYP/BSI Optimized geometry (charge = 0, singlet)

|    |               |               |               |
|----|---------------|---------------|---------------|
| Ni | 0.1367278037  | 0.0375168509  | 0.5347741965  |
| S  | 2.4674765721  | 0.8626135898  | -1.2561346941 |
| C  | 1.5893106654  | 1.2470480569  | 0.2987830491  |
| C  | 3.3854276742  | 2.4227437773  | -1.5782956179 |
| C  | 0.3945928941  | 2.2039921044  | 0.1341309845  |
| C  | 2.4779187938  | 1.5182426874  | 1.435855939   |
| H  | 4.052244808   | 2.6600110761  | -0.7449851686 |
| H  | 3.9820444177  | 2.2604103328  | -2.4808983354 |
| H  | 2.7048435044  | 3.262709952   | -1.7497795507 |
| C  | 0.2917246227  | 3.3210572748  | 1.1302163743  |
| H  | 0.3169237669  | 2.5809477431  | -0.8939762573 |
| C  | 2.2673016086  | 2.5189859041  | 2.3245636262  |
| H  | 3.3382722426  | 0.8648528213  | 1.5444942347  |
| C  | 1.1599300418  | 3.4433137648  | 2.1524231959  |
| H  | -0.4987329442 | 4.0539422405  | 0.9797970054  |
| H  | 2.9405108592  | 2.6553715232  | 3.1666208838  |
| H  | 1.0596722994  | 4.2719471241  | 2.8502708644  |
| Si | 1.2177068757  | -1.8852411776 | 1.0111136097  |
| H  | -0.5864645734 | 1.5990728758  | 0.201448973   |
| C  | 3.1083670804  | -1.9139894228 | 1.2578389031  |
| C  | 0.5048685302  | -2.60838388   | 2.6386709551  |
| C  | 0.8501474298  | -3.1659381654 | -0.3660071398 |
| H  | 3.4469279616  | -2.9516760201 | 1.3843993326  |
| H  | 3.6431925023  | -1.485126444  | 0.4039871917  |
| H  | 3.4069662299  | -1.3633300355 | 2.1578792016  |
| H  | 0.7101542798  | -1.9530856124 | 3.4945728449  |
| H  | 0.9671938349  | -3.5818454253 | 2.854191588   |
| H  | -0.5795752868 | -2.7613448004 | 2.5858806885  |

|   |               |               |               |
|---|---------------|---------------|---------------|
| H | 1.2836873273  | -4.1426560591 | -0.1097580831 |
| H | -0.2259382846 | -3.3138331956 | -0.5213437369 |
| H | 1.2832748599  | -2.8515420239 | -1.3232551876 |
| S | -1.9202933199 | -0.8561173217 | 0.6172998917  |
| C | -2.5854261662 | -0.8557676406 | -1.0578124577 |
| C | -3.0286173905 | 0.3619806833  | 1.4331435773  |
| C | -3.7852566286 | -1.5302195298 | -1.3138794905 |
| C | -1.8899250054 | -0.2317317533 | -2.0985256392 |
| H | -2.9794592918 | 1.3340186709  | 0.9370679828  |
| H | -4.0530906381 | -0.016707361  | 1.4250800969  |
| H | -2.6847570745 | 0.4573083325  | 2.4663416662  |
| C | -4.3012249479 | -1.5536309319 | -2.6096360712 |
| H | -4.3054296374 | -2.0386737244 | -0.5069456418 |
| C | -2.4057707024 | -0.2721119376 | -3.3949636282 |
| H | -0.9478517692 | 0.2673939523  | -1.8951285287 |
| C | -3.6121554031 | -0.9258691858 | -3.6507830218 |
| H | -5.2344345364 | -2.0734161743 | -2.8079160909 |
| H | -1.8607921121 | 0.2076229582  | -4.2029384408 |
| H | -4.0118577735 | -0.9542424739 | -4.6605910746 |

47

**TS<sub>r2</sub>** B3LYP/BSI Optimized geometry (charge = 0, singlet)

|    |               |               |               |
|----|---------------|---------------|---------------|
| Ni | -0.4505069493 | 0.5389192026  | -0.2182267554 |
| S  | 2.2110879797  | -0.0335328016 | -1.2937359558 |
| C  | 1.4934865269  | 0.9773996115  | -0.0140040472 |
| C  | 3.946986266   | 0.605609553   | -1.6831930858 |
| C  | 0.6674112659  | 2.1138794764  | -0.4206098797 |
| C  | 2.1587068824  | 1.0506854742  | 1.2745626866  |
| H  | 4.5767344461  | 0.5656662953  | -0.7922464095 |
| H  | 4.3596023375  | -0.0266268133 | -2.4743579217 |
| H  | 3.8569787196  | 1.6360688577  | -2.0378599853 |
| C  | 0.5816866949  | 3.2464403951  | 0.4785034991  |
| H  | 0.5813753817  | 2.3442361098  | -1.48413653   |
| C  | 1.9856881455  | 2.1203936982  | 2.103224394   |
| H  | 2.8239918692  | 0.2437796227  | 1.5729634348  |
| C  | 1.1851755091  | 3.2451452739  | 1.6996605154  |
| H  | 0.0179848028  | 4.1148667763  | 0.1453106042  |
| H  | 2.4895097402  | 2.1402695931  | 3.066555969   |
| H  | 1.0956964951  | 4.1014368488  | 2.3626662442  |
| Si | 1.6328244946  | -1.9613047302 | 0.0545736186  |
| H  | -1.6308058828 | 1.4819360077  | -0.3719804304 |
| C  | 3.435058416   | -2.5334339057 | 0.2949368406  |
| C  | 0.853616168   | -2.1331248221 | 1.7815811367  |
| C  | 0.8526736552  | -3.1266301906 | -1.213389078  |
| H  | 3.4386676664  | -3.5350852491 | 0.7459446494  |
| H  | 3.9788829172  | -2.5909846251 | -0.6553843311 |
| H  | 4.0033864105  | -1.8750864075 | 0.9633997316  |
| H  | 1.0335346071  | -1.2524537894 | 2.4052696069  |
| H  | 1.2961669108  | -3.0025025879 | 2.2887886282  |
| H  | -0.2249225217 | -2.2907445075 | 1.7033504912  |
| H  | 1.044055285   | -4.1643173584 | -0.906545551  |
| H  | -0.2287415323 | -2.9969440922 | -1.2971487715 |
| H  | 1.2969700866  | -2.985701765  | -2.2044935372 |
| S  | -1.8489165374 | -1.1653944355 | -0.1378179308 |
| C  | -2.7455651683 | -1.2518463889 | -1.7033430382 |
| C  | -3.1948432748 | -0.6088738082 | 0.9762270293  |
| C  | -3.3975700664 | -2.4451590648 | -2.0348480767 |
| C  | -2.7692322177 | -0.1636239913 | -2.5807212496 |

|   |               |               |               |
|---|---------------|---------------|---------------|
| H | -3.5475626516 | 0.3745514047  | 0.6602787111  |
| H | -3.9999479332 | -1.3477505355 | 0.967908497   |
| H | -2.7686118621 | -0.5392107303 | 1.9805459262  |
| C | -4.088648438  | -2.5422566859 | -3.2438897256 |
| H | -3.3600163497 | -3.2896917991 | -1.3521746873 |
| C | -3.4585192541 | -0.2707833132 | -3.7894512815 |
| H | -2.2539590087 | 0.7462365222  | -2.2884078006 |
| C | -4.1186856678 | -1.4560506403 | -4.1218280863 |
| H | -4.5972998322 | -3.4673372513 | -3.5015717123 |
| H | -3.4784178983 | 0.5741378146  | -4.4727300694 |
| H | -4.6528284837 | -1.5355762277 | -5.0649599262 |

29

**T2<sub>2</sub>** B3LYP/BSI Optimized geometry (charge = 0, singlet)

|    |               |               |               |
|----|---------------|---------------|---------------|
| Ni | -0.1618252048 | 1.1628025767  | -0.1973545399 |
| C  | 0.1075203618  | 1.9144809867  | 1.4752636403  |
| C  | 0.7198228263  | 2.8400219335  | 0.6471950072  |
| C  | 0.1141966876  | 2.1392186596  | 2.8496840231  |
| C  | 1.3542365123  | 3.9912819776  | 1.1079833064  |
| H  | 0.7154348786  | 2.6617184197  | -0.4800090515 |
| C  | 0.7418050198  | 3.2895448491  | 3.350411293   |
| H  | -0.353981301  | 1.4447342007  | 3.5458855901  |
| C  | 1.3554298027  | 4.207055699   | 2.4912315734  |
| H  | 1.8282284478  | 4.6978693414  | 0.4314916807  |
| H  | 0.7537143806  | 3.4728362709  | 4.4228746386  |
| H  | 1.8371285977  | 5.0923154656  | 2.8978883214  |
| H  | -0.0911782892 | 0.9862975828  | -1.7042415185 |
| S  | -1.1275674579 | -0.6955790635 | 0.0636477849  |
| C  | -2.4413810319 | -0.9693477872 | -1.1446243292 |
| C  | -2.1298371588 | -0.6964891583 | 1.599357609   |
| C  | -3.0568720501 | -2.225939569  | -1.1861106834 |
| C  | -2.8216831681 | 0.0342806369  | -2.0374621935 |
| H  | -2.841083013  | 0.1312619415  | 1.5991251111  |
| H  | -2.6545656732 | -1.6506741846 | 1.6858996616  |
| H  | -1.4292036694 | -0.5806982174 | 2.4279893801  |
| C  | -4.0753769951 | -2.4653498918 | -2.1089304384 |
| H  | -2.7383495918 | -3.014162829  | -0.5093630694 |
| C  | -3.8363046857 | -0.2160438066 | -2.9629714199 |
| H  | -2.2963894574 | 0.9822009402  | -2.0132538965 |
| C  | -4.4674352496 | -1.4606521107 | -2.9971007012 |
| H  | -4.5534074153 | -3.4405312633 | -2.1410761358 |
| H  | -4.1306933504 | 0.5650217956  | -3.6584462625 |
| H  | -5.2568267525 | -1.6516133965 | -3.7187913813 |

47

**T3<sub>1</sub>** B3LYP/BSI Optimized geometry (charge = 0, singlet)

|    |               |               |               |
|----|---------------|---------------|---------------|
| Ni | -0.0592472651 | 0.2437978583  | 0.2787091916  |
| S  | -1.9184876986 | 0.2150752127  | -0.8060434294 |
| C  | -3.1915552938 | -0.8476180346 | -0.0809291438 |
| C  | -2.9236674048 | 1.7525721544  | -0.8758046388 |
| C  | -4.2337981564 | -1.2833583438 | -0.9068221087 |
| C  | -3.155196751  | -1.2285813077 | 1.2619316589  |
| H  | -3.230457996  | 2.0560219295  | 0.1268136191  |
| H  | -2.3059877863 | 2.5291036839  | -1.3252850908 |
| H  | -3.8026069256 | 1.5690129711  | -1.4979078809 |
| C  | -5.246675876  | -2.0882389345 | -0.3822371072 |
| H  | -4.2480774752 | -1.0033854895 | -1.9566946341 |

|    |               |               |               |
|----|---------------|---------------|---------------|
| C  | -4.170633536  | -2.0333125302 | 1.7810437882  |
| H  | -2.3177859194 | -0.9167754024 | 1.875782506   |
| C  | -5.2179406518 | -2.462231534  | 0.9627519954  |
| H  | -6.0511509946 | -2.4299584458 | -1.0279021462 |
| H  | -4.1402718628 | -2.3272088023 | 2.8268359197  |
| H  | -6.0048496099 | -3.0914935214 | 1.3695769265  |
| Si | 0.5636718899  | 2.4447222824  | -0.2678577986 |
| H  | -0.4250462373 | -1.2042902176 | 0.5891753473  |
| C  | 0.4209375189  | 2.8573525398  | -2.1432140883 |
| C  | -0.3945371012 | 3.7936667058  | 0.7138212888  |
| C  | 2.3953065888  | 2.90807835    | 0.0873812572  |
| H  | 0.6641112776  | 3.9121592215  | -2.3330181808 |
| H  | 1.1472837025  | 2.2505049603  | -2.6997499684 |
| H  | -0.5609517732 | 2.6597773213  | -2.5898631865 |
| H  | -1.4829234482 | 3.7505964572  | 0.5961614054  |
| H  | -0.0688351551 | 4.7980240291  | 0.4088109856  |
| H  | -0.1817443716 | 3.6949061216  | 1.7863944482  |
| H  | 2.5799217149  | 3.9490208565  | -0.2121510417 |
| H  | 2.6474659459  | 2.8210518867  | 1.151025054   |
| H  | 3.0983343157  | 2.2790680197  | -0.4726248307 |
| S  | 1.82395322    | -0.0996609969 | 1.3288202263  |
| C  | 2.963081783   | -0.7747578637 | 0.1033323906  |
| C  | 1.6583735173  | -1.5662506132 | 2.4183723089  |
| C  | 4.3181435853  | -0.4404935379 | 0.1865600681  |
| C  | 2.5006113725  | -1.6232068756 | -0.9095748074 |
| H  | 1.2871988077  | -2.4189910192 | 1.8483630669  |
| H  | 2.6268844021  | -1.7809489284 | 2.8787266778  |
| H  | 0.9317953814  | -1.3035429901 | 3.1912515804  |
| C  | 5.2162123625  | -0.9654508255 | -0.7454103177 |
| H  | 4.6620248371  | 0.2296426143  | 0.9685064401  |
| C  | 3.4055052846  | -2.1447640324 | -1.8344285222 |
| H  | 1.4432600358  | -1.8656873711 | -0.9595306918 |
| C  | 4.7615040052  | -1.8169740813 | -1.753972691  |
| H  | 6.2692424799  | -0.7050894971 | -0.683649063  |
| H  | 3.0490525479  | -2.8027556995 | -2.6222016818 |
| H  | 5.4620817132  | -2.2219552806 | -2.4791401013 |

47

**TS<sub>T3</sub>** B3LYP/BSI Optimized geometry (charge = 0, singlet)

|    |               |               |               |
|----|---------------|---------------|---------------|
| Ni | -0.1852564739 | 0.1442632993  | 0.1524911942  |
| S  | -2.0038980179 | 0.3191848304  | -1.0772379566 |
| C  | -2.2790771863 | -1.0809374285 | 0.2671081313  |
| C  | -3.1540880305 | 1.6595764924  | -0.6055843503 |
| C  | -2.9032294938 | -2.2846532892 | -0.2014984038 |
| C  | -2.6233093812 | -0.6542218753 | 1.5861228475  |
| H  | -3.6653653562 | 1.3602888248  | 0.314721395   |
| H  | -2.6104278701 | 2.5902656583  | -0.4401733974 |
| H  | -3.8839151241 | 1.7850809436  | -1.4085308676 |
| C  | -3.6681153626 | -3.0625502274 | 0.6454083794  |
| H  | -2.7323444984 | -2.5995537234 | -1.2268377594 |
| C  | -3.4005531795 | -1.4671574121 | 2.4170617925  |
| H  | -2.2620349875 | 0.2987953622  | 1.9627634363  |
| C  | -3.9207587203 | -2.6805976126 | 1.9761786085  |
| H  | -4.099422675  | -3.9829717173 | 0.2568228068  |
| H  | -3.6124654462 | -1.118957153  | 3.4262720722  |
| H  | -4.5337495849 | -3.2969984612 | 2.6258664113  |
| Si | 0.5389334003  | 2.3322299199  | 0.2121199286  |
| H  | -0.8299201116 | -1.3083964648 | 0.0517687959  |

|   |               |               |               |
|---|---------------|---------------|---------------|
| C | 0.2877051949  | 3.2013515592  | -1.47533225   |
| C | -0.3401790553 | 3.3842734457  | 1.5539943282  |
| C | 2.4082877456  | 2.5387302932  | 0.5790859779  |
| H | 0.5876085598  | 4.2568462963  | -1.4202641182 |
| H | 0.9073900796  | 2.7229919804  | -2.2442925748 |
| H | -0.7485912991 | 3.1712241064  | -1.8327093654 |
| H | -1.4317359331 | 3.3958086942  | 1.4483653908  |
| H | 0.0054583917  | 4.4268476071  | 1.5189398406  |
| H | -0.1149118929 | 2.9970643987  | 2.5558117376  |
| H | 2.6892922165  | 3.6005382042  | 0.5544495887  |
| H | 2.6732104093  | 2.1505763118  | 1.5701399674  |
| H | 3.0303884345  | 2.0175093531  | -0.1590846336 |
| S | 1.4043639123  | -0.6370095516 | 1.4255098152  |
| C | 2.7393233352  | -1.2815380156 | 0.3981146589  |
| C | 0.7615252231  | -2.1941792793 | 2.1553064421  |
| C | 4.0556958528  | -1.1143639757 | 0.8386368865  |
| C | 2.4735303133  | -1.9256980632 | -0.8156330279 |
| H | 0.5512514577  | -2.9219299404 | 1.3700975871  |
| H | 1.4928152123  | -2.5838698142 | 2.867350406   |
| H | -0.1702983872 | -1.9425385467 | 2.6677132642  |
| C | 5.1097084921  | -1.6047326712 | 0.0646046627  |
| H | 4.2504415928  | -0.6012540165 | 1.7754239961  |
| C | 3.531602263   | -2.4167212167 | -1.58036079   |
| H | 1.4462163198  | -2.0363750971 | -1.1513835131 |
| C | 4.8488903482  | -2.256372452  | -1.1419837803 |
| H | 6.1331093078  | -1.4744336003 | 0.4050781645  |
| H | 3.3270116783  | -2.9174043901 | -2.5226118443 |
| H | 5.6708045169  | -2.6348900659 | -1.743312661  |

35

**T3<sub>2</sub>** B3LYP/BSI Optimized geometry (charge = 0, singlet)

|    |               |               |               |
|----|---------------|---------------|---------------|
| Ni | -0.0995579579 | 0.6074821562  | -0.5360717654 |
| S  | -1.4993015315 | 1.1643579624  | -1.9913236082 |
| C  | -3.1063688867 | 1.5522363653  | -1.1729253121 |
| H  | -3.4459489123 | 0.7421903594  | -0.5228312718 |
| H  | -3.0325618725 | 2.473175002   | -0.5886386019 |
| H  | -3.8487909873 | 1.7008591623  | -1.9620299082 |
| Si | 0.661811456   | 2.6210775634  | -0.0406231674 |
| C  | 1.707195658   | 3.2933348669  | -1.4820707924 |
| C  | -0.6894071298 | 3.8899472212  | 0.3846703385  |
| C  | 1.8095565447  | 2.5723575538  | 1.4890918801  |
| H  | 2.1283284582  | 4.273648925   | -1.2187731442 |
| H  | 2.545509115   | 2.6264611089  | -1.7165860682 |
| H  | 1.1030431047  | 3.4102717131  | -2.3877327845 |
| H  | -1.3100408745 | 4.1203172289  | -0.4873533328 |
| H  | -0.2268735716 | 4.8247126266  | 0.730398975   |
| H  | -1.3466050646 | 3.5342417481  | 1.1873533723  |
| H  | 2.1763818246  | 3.5868402592  | 1.6998218042  |
| H  | 1.2890267348  | 2.2156166984  | 2.3855503492  |
| H  | 2.6862740111  | 1.9319977151  | 1.3354675555  |
| S  | 1.1655704414  | -0.6522348329 | 0.7249094432  |
| C  | 2.7589426089  | -0.9014240064 | -0.0821942303 |
| C  | 0.4110445784  | -2.3093058254 | 0.4570954214  |
| C  | 3.8616616528  | -1.2707371685 | 0.6950726181  |
| C  | 2.8962556401  | -0.7133829912 | -1.4627200246 |
| H  | 0.3024741196  | -2.5193398502 | -0.6093385507 |
| H  | 1.0334189213  | -3.0699223065 | 0.9340165001  |
| H  | -0.5746837086 | -2.2931541283 | 0.9291507563  |

|   |              |               |               |
|---|--------------|---------------|---------------|
| C | 5.1020794827 | -1.4656778201 | 0.0841772828  |
| H | 3.7487124972 | -1.3995365902 | 1.7675392759  |
| C | 4.1386278858 | -0.9110144157 | -2.0657216719 |
| H | 2.0342634597 | -0.4077854258 | -2.0482857358 |
| C | 5.2406285261 | -1.2876898375 | -1.2938971382 |
| H | 5.9596930852 | -1.7518422898 | 0.6865913504  |
| H | 4.2453767784 | -0.7649341736 | -3.1368355398 |
| H | 6.2078129124 | -1.437177574  | -1.7655992746 |

47

**T4<sub>1</sub>** B3LYP/BSI Optimized geometry (charge = 0, singlet)

|    |               |               |               |
|----|---------------|---------------|---------------|
| Ni | 0.5842123524  | 0.4601044068  | 0.0596093953  |
| S  | -0.8690674339 | -1.205573002  | -0.1589091016 |
| C  | -2.563019794  | -0.7786410603 | -0.5720683004 |
| C  | -0.4697888582 | -2.4849469311 | -1.3967416344 |
| C  | -3.3234158346 | -0.1822230313 | 0.4436345049  |
| C  | -3.1386016187 | -0.9980495642 | -1.8290405972 |
| H  | -1.2533861551 | -3.2468997086 | -1.3998868723 |
| H  | -0.3452813862 | -2.0653167002 | -2.3981516817 |
| H  | 0.4714893265  | -2.9292738469 | -1.0664291231 |
| C  | -4.6420214443 | 0.1970627844  | 0.1990920721  |
| H  | -2.881306859  | -0.0213640485 | 1.4229415568  |
| C  | -4.4655344799 | -0.62645327   | -2.0611971545 |
| H  | -2.5646041621 | -1.4504363214 | -2.6306967115 |
| C  | -5.2203013287 | -0.0261792234 | -1.0530856725 |
| H  | -5.2222604054 | 0.658187703   | 0.9938012216  |
| H  | -4.9044917436 | -0.8032043223 | -3.0396281219 |
| H  | -6.2504773793 | 0.2632436078  | -1.2398953741 |
| Si | -0.0448792982 | 2.4993284874  | -0.9046204387 |
| H  | -0.4743744441 | 1.5630375481  | 0.3498434655  |
| C  | 0.6676239589  | 4.0708447215  | -0.1216248611 |
| C  | 0.9472697284  | 2.0852774737  | -2.485501822  |
| C  | -1.8047725021 | 2.8450868772  | -1.5229923846 |
| H  | 0.6346715411  | 4.9054938189  | -0.8335260446 |
| H  | 0.0916421432  | 4.3658267502  | 0.7633357496  |
| H  | 1.7099926802  | 3.9394923271  | 0.1886998007  |
| H  | 2.0168296231  | 1.9421104313  | -2.3034693983 |
| H  | 0.8361792735  | 2.9182729331  | -3.1949280505 |
| H  | 0.5663822077  | 1.1856579638  | -2.9820421168 |
| H  | -1.8052376536 | 3.6423300271  | -2.2775685286 |
| H  | -2.2341669958 | 1.9484917789  | -1.9851082092 |
| H  | -2.4777402875 | 3.1488107376  | -0.7129938901 |
| C  | 2.4076156818  | 0.9757971232  | 0.5816983152  |
| C  | 2.3724720088  | -0.4087697616 | 0.1513831786  |
| C  | 2.4938535749  | 1.2479727457  | 1.9940905167  |
| H  | 2.7972295943  | 1.7363071939  | -0.0947258233 |
| C  | 2.5609511487  | -1.4455493669 | 1.147002946   |
| H  | 2.7017409863  | -0.6480019829 | -0.8613080341 |
| C  | 2.5361552766  | 0.2262787671  | 2.9064353689  |
| H  | 2.5366857291  | 2.281671828   | 2.3288810787  |
| C  | 2.59130892    | -1.1381386203 | 2.4867650173  |
| S  | 2.7911779131  | -3.0872678422 | 0.4839693314  |
| H  | 2.5812856002  | 0.4456064407  | 3.9704573455  |
| H  | 2.7020440982  | -1.9103732541 | 3.2400084889  |
| C  | 2.9622364539  | -4.1340011021 | 1.9644834148  |
| H  | 2.0610965648  | -4.1003870356 | 2.5829765442  |
| H  | 3.1075429194  | -5.1537976908 | 1.5989699784  |
| H  | 3.8327827594  | -3.8403657897 | 2.5575416559  |

47

**TS<sub>T4</sub>** B3LYP/BSI Optimized geometry (charge = 0, singlet)

|    |               |               |               |
|----|---------------|---------------|---------------|
| Ni | -0.0652889113 | 0.2306721388  | 0.6694200387  |
| S  | -1.1560776778 | -1.4168985349 | 1.86491858    |
| C  | -2.3724379486 | -0.3038348905 | 0.6103148883  |
| C  | -1.2087767842 | -3.0265990879 | 1.0096021397  |
| C  | -3.3232983224 | 0.456714016   | 1.3687689252  |
| C  | -2.8723962963 | -0.9756052519 | -0.5474830242 |
| H  | -2.1912303507 | -3.151907372  | 0.5413582108  |
| H  | -0.4215432951 | -3.1305270471 | 0.2588671792  |
| H  | -1.0780341991 | -3.7925485449 | 1.7786506919  |
| C  | -4.6450154407 | 0.5501380528  | 0.9727477149  |
| H  | -2.9903373436 | 0.9621818531  | 2.2709236495  |
| C  | -4.211342881  | -0.8678798071 | -0.9180833122 |
| H  | -2.1849358207 | -1.525529096  | -1.1825205607 |
| C  | -5.1166383622 | -0.1144944356 | -0.1709159633 |
| H  | -5.3304176484 | 1.138891422   | 1.5783853007  |
| H  | -4.5428489225 | -1.3808803267 | -1.8183375188 |
| H  | -6.1573497238 | -0.0370554835 | -0.4689722047 |
| Si | -0.0281771182 | 2.0140951134  | -0.7577552363 |
| H  | -1.4495155439 | 0.5652951578  | 0.1611671608  |
| C  | -0.7673046348 | 3.5653431913  | 0.0781838705  |
| C  | 1.7415046824  | 2.5014672017  | -1.3167104264 |
| C  | -0.9600564074 | 1.6981446959  | -2.3940848193 |
| H  | -0.749563021  | 4.4281069121  | -0.6012281491 |
| H  | -1.8084844175 | 3.4014835204  | 0.3815709178  |
| H  | -0.2022999745 | 3.8418801394  | 0.9775804998  |
| H  | 2.4279253009  | 2.7190744604  | -0.4892656333 |
| H  | 1.6878098129  | 3.4075431276  | -1.9354877366 |
| H  | 2.2016774861  | 1.7199702103  | -1.9345636362 |
| H  | -0.9546708899 | 2.5954290653  | -3.0274481087 |
| H  | -0.4781527308 | 0.89245649    | -2.9630660754 |
| H  | -2.0042826253 | 1.4065558998  | -2.2328471609 |
| C  | 1.7456731069  | 0.7157917294  | 1.7562816202  |
| C  | 2.0353927528  | -0.2629888718 | 0.7753162986  |
| C  | 1.6727910435  | 0.3443359913  | 3.1199128801  |
| H  | 1.8312248888  | 1.767159066   | 1.5043566117  |
| C  | 2.2867035847  | -1.606839871  | 1.1735910517  |
| H  | 2.3446153696  | 0.0475722763  | -0.2179550716 |
| C  | 1.8634113949  | -0.9775610629 | 3.479394228   |
| H  | 1.4775820179  | 1.100012767   | 3.8746006297  |
| C  | 2.1704243999  | -1.9577246437 | 2.5142227157  |
| S  | 2.7260552581  | -2.7289740577 | -0.135172164  |
| H  | 1.7958452534  | -1.2731434737 | 4.5229053063  |
| H  | 2.336004567   | -2.9787521985 | 2.8394091525  |
| C  | 3.1776033163  | -4.2580874504 | 0.7475499951  |
| H  | 2.3178957358  | -4.7028138296 | 1.2562665016  |
| H  | 3.5285841791  | -4.9506591894 | -0.0215582866 |
| H  | 3.9865453208  | -4.079636881  | 1.4612611893  |

35

**T4<sub>2</sub>** B3LYP/BSI Optimized geometry (charge = 0, singlet)

|    |               |               |               |
|----|---------------|---------------|---------------|
| Ni | 1.0303513461  | 0.4522834964  | 0.6007107511  |
| S  | -1.0438563648 | -0.0811832608 | 0.8167164409  |
| C  | -1.1629118019 | -1.6904875347 | -0.0752397194 |
| H  | -0.9925613216 | -1.5657859875 | -1.1482775592 |
| H  | -0.4553201608 | -2.4275227225 | 0.3155760431  |

|    |               |               |               |
|----|---------------|---------------|---------------|
| H  | -2.1778482613 | -2.0717011572 | 0.0702233401  |
| Si | 0.3648567151  | 1.8208165028  | -1.0174867449 |
| C  | -0.7033229509 | 3.237442547   | -0.3365701111 |
| C  | 1.909773527   | 2.6717901724  | -1.7723298162 |
| C  | -0.4863238662 | 1.0000540182  | -2.5045237791 |
| H  | -0.9167725521 | 3.9622726481  | -1.1342673707 |
| H  | -1.6530080712 | 2.865231923   | 0.0582827178  |
| H  | -0.1885336028 | 3.7775499655  | 0.4675358126  |
| H  | 2.5376060294  | 3.1843744955  | -1.0338732097 |
| H  | 1.564908977   | 3.4343936514  | -2.4846594624 |
| H  | 2.5437507052  | 1.9741128332  | -2.3325802119 |
| H  | -0.5858064386 | 1.7265556379  | -3.3225538407 |
| H  | 0.0980892952  | 0.1553252373  | -2.889619539  |
| H  | -1.4847642577 | 0.6359491137  | -2.2449962462 |
| C  | 2.8108699452  | 1.1814473086  | 1.3108004778  |
| C  | 3.0314364453  | 0.2395782526  | 0.2700210897  |
| C  | 2.5460828707  | 0.728958485   | 2.6313410543  |
| H  | 2.9864283295  | 2.2361461751  | 1.125679154   |
| C  | 3.0177290078  | -1.1631065189 | 0.5620103417  |
| H  | 3.3983347073  | 0.5752606716  | -0.693845056  |
| C  | 2.4470074899  | -0.6304648219 | 2.8731022383  |
| H  | 2.3954999427  | 1.4470583114  | 3.4305347686  |
| C  | 2.6777202697  | -1.5789640941 | 1.8462979464  |
| S  | 3.448926838   | -2.2397584873 | -0.7814400694 |
| H  | 2.1891967007  | -0.9888970525 | 3.8650142936  |
| H  | 2.6079684508  | -2.6328909207 | 2.0886147392  |
| C  | 3.2646501343  | -3.9047442153 | -0.0655308391 |
| H  | 2.2334549533  | -4.0947898354 | 0.2448640815  |
| H  | 3.5261300698  | -4.5997673881 | -0.8672871196 |
| H  | 3.9479378996  | -4.0590184497 | 0.7740424041  |

51

TS<sub>5A-6A</sub> B3LYP/BSI Optimized geometry (charge = 0, singlet)

|    |               |               |               |
|----|---------------|---------------|---------------|
| Ni | 0.6449949475  | -0.1462385033 | -0.0982196221 |
| S  | 0.6908384138  | -2.2717515171 | -0.3603876395 |
| C  | 2.4844542658  | -0.0095975643 | 0.1292320658  |
| C  | 2.2739758382  | -2.9513723667 | -0.9909121339 |
| C  | 3.0771100118  | -0.2214634572 | 1.3811639189  |
| C  | 3.2868786241  | 0.3991997424  | -0.9434827356 |
| H  | 2.5755684058  | -2.4728375347 | -1.9256348673 |
| H  | 3.0690688695  | -2.828717414  | -0.252354337  |
| H  | 2.1130909947  | -4.0175783784 | -1.1724076907 |
| C  | 4.4503672492  | -0.0215926429 | 1.5551664867  |
| H  | 2.476425294   | -0.5571235889 | 2.2221784526  |
| C  | 4.6613062605  | 0.5953607421  | -0.7652613634 |
| H  | 2.8555306348  | 0.5536858762  | -1.9297382145 |
| C  | 5.2471638368  | 0.389225009   | 0.4840968842  |
| H  | 4.8961936751  | -0.1928153746 | 2.5324151841  |
| H  | 5.2709897748  | 0.9104094134  | -1.6091682856 |
| H  | 6.3144320691  | 0.541233745   | 0.6213375789  |
| Si | -2.9932773057 | -1.8790187124 | 0.1363580521  |
| H  | -1.8942096849 | -0.8465265033 | 0.1909472422  |
| C  | -4.6250466057 | -0.9917740073 | 0.5173426696  |
| C  | -3.0224226256 | -2.6062836288 | -1.6049643557 |
| C  | -2.6247318387 | -3.1878231762 | 1.4450276502  |
| H  | -5.4628627276 | -1.7002509665 | 0.49874869    |
| H  | -4.6106144765 | -0.5258606442 | 1.5097592043  |
| H  | -4.8435569984 | -0.2070975992 | -0.2169331095 |



|   |               |               |               |
|---|---------------|---------------|---------------|
| H | -3.2681810978 | -1.8442663142 | -2.3544660886 |
| H | -3.7688364033 | -3.4061931482 | -1.6871761274 |
| H | -2.0409907978 | -3.0228092435 | -1.8550759969 |
| H | -3.36517823   | -3.9969281306 | 1.4147636078  |
| H | -1.6329849787 | -3.6211325454 | 1.2776639033  |
| H | -2.6408994156 | -2.7601898737 | 2.4547561232  |
| C | 0.1982175835  | 1.673485273   | 0.7486133402  |
| C | 0.1706329979  | 1.7412627366  | -0.6407033541 |
| C | -0.9632482135 | 1.6386642955  | 1.7359715065  |
| H | 1.1380154349  | 1.975356202   | 1.2061493272  |
| C | -1.0472787099 | 1.7701291439  | -1.5425216344 |
| H | 1.0743844558  | 2.1261452067  | -1.1141335456 |
| C | -2.3276264653 | 2.1847683846  | 1.2504306577  |
| H | -0.6460273264 | 2.2329743728  | 2.6027719923  |
| H | -1.1153877503 | 0.621481666   | 2.1243819176  |
| C | -1.5842227301 | 3.205607242   | -1.7519236602 |
| H | -1.8378847971 | 1.1157749106  | -1.1713022249 |
| H | -0.7664584771 | 1.3733446475  | -2.5265024777 |
| C | -2.2754303536 | 3.5961383631  | 0.7108585004  |
| H | -2.7662651661 | 1.4997700774  | 0.5224049998  |
| H | -3.0048962104 | 2.1658829836  | 2.11366705    |
| C | -1.972383564  | 4.0032620222  | -0.5282203743 |
| H | -0.816671032  | 3.7801827915  | -2.2902926329 |
| H | -2.4406966778 | 3.1587520838  | -2.44323105   |
| H | -2.5037598283 | 4.3761176798  | 1.4376970845  |
| H | -2.0056501492 | 5.0787002247  | -0.7083045684 |

51

**6A** B3LYP/BSI Optimized geometry (charge = 0, singlet)

|    |               |               |               |
|----|---------------|---------------|---------------|
| Ni | 0.4049659981  | -0.3400218886 | 0.1628119516  |
| S  | 0.6871244344  | -2.4874967766 | 0.2173924775  |
| C  | 2.2530687741  | -0.0660957451 | 0.02985316    |
| C  | 2.3985111093  | -3.1193880968 | 0.0404726791  |
| C  | 3.0442803646  | 0.0924294318  | 1.1763652314  |
| C  | 2.85941229    | 0.0730339684  | -1.2268927207 |
| H  | 2.8383846831  | -2.8209663761 | -0.9134964541 |
| H  | 3.0390553808  | -2.7686589066 | 0.8523347084  |
| H  | 2.3317764792  | -4.2103800213 | 0.0799117562  |
| C  | 4.4079473453  | 0.38669665    | 1.0682445852  |
| H  | 2.6062981613  | -0.0284012934 | 2.1644958835  |
| C  | 4.2231618691  | 0.3671739639  | -1.3336850822 |
| H  | 2.2753760651  | -0.059155276  | -2.13504678   |
| C  | 5.0026915622  | 0.5274026017  | -0.1867927618 |
| H  | 5.004309783   | 0.5034278943  | 1.9705487     |
| H  | 4.6741567668  | 0.4694358513  | -2.3183810368 |
| H  | 6.0621466358  | 0.7549706343  | -0.2701809958 |
| Si | -2.7042701316 | -1.7206062711 | -0.1231409395 |
| H  | -1.5437617437 | -0.7985538742 | 0.2625059391  |
| C  | -4.2944784856 | -0.7012507198 | 0.0122415378  |
| C  | -2.4293070418 | -2.283424654  | -1.8980899908 |
| C  | -2.7403675995 | -3.130183233  | 1.1218690297  |
| H  | -5.1550433202 | -1.3446288514 | -0.2134742036 |
| H  | -4.4418216849 | -0.3030913485 | 1.0224908433  |
| H  | -4.3234842102 | 0.1376106076  | -0.692156421  |
| H  | -2.3991296868 | -1.4309763468 | -2.586915349  |
| H  | -3.2428408707 | -2.9446914352 | -2.222258247  |
| H  | -1.4838191447 | -2.8280794865 | -1.9809714189 |
| H  | -3.5112378506 | -3.8622849531 | 0.849644486   |

|   |               |               |               |
|---|---------------|---------------|---------------|
| H | -1.7722649509 | -3.6383756657 | 1.1548665699  |
| H | -2.9700215131 | -2.762708316  | 2.1289800334  |
| C | -0.002106678  | 1.5256967457  | 0.9292021523  |
| C | -0.0800679663 | 1.558898285   | -0.4588883963 |
| C | -1.1283230502 | 1.6071149078  | 1.9533106977  |
| H | 0.969015983   | 1.7922474211  | 1.340636415   |
| C | -1.3199933157 | 1.7181330659  | -1.3110596787 |
| H | 0.8289151941  | 1.872217463   | -0.9714485516 |
| C | -2.420850149  | 2.3436594783  | 1.5188346549  |
| H | -0.7151710371 | 2.1268864105  | 2.8270001844  |
| H | -1.4044043469 | 0.6074813352  | 2.3168498089  |
| C | -1.6692073257 | 3.2099429766  | -1.5285959938 |
| H | -2.1740787552 | 1.1869841192  | -0.892561348  |
| H | -1.1370030686 | 1.272329932   | -2.2978193297 |
| C | -2.1921582125 | 3.7274375088  | 0.9539827166  |
| H | -2.9835194455 | 1.7267469938  | 0.8161134073  |
| H | -3.0575710316 | 2.4283929114  | 2.4087610043  |
| C | -1.8889095963 | 4.070663628   | -0.3045592546 |
| H | -0.8578204687 | 3.6686091419  | -2.1117222987 |
| H | -2.5558181156 | 3.2701067592  | -2.180078961  |
| H | -2.2763645425 | 4.5410700427  | 1.6748209713  |
| H | -1.7778135396 | 5.1375188065  | -0.5034313708 |

51

TS<sub>6A-7</sub> B3LYP/BSI Optimized geometry (charge = 0, singlet)

|    |               |               |               |
|----|---------------|---------------|---------------|
| Ni | -0.2848330984 | -0.050300093  | -0.1189142452 |
| S  | -1.5088519492 | 1.5520497735  | -1.0071481969 |
| C  | -1.7629743629 | -1.2271944733 | 0.0983622624  |
| C  | -2.2695601686 | -1.5140425799 | 1.3776263372  |
| C  | -2.4067176718 | -1.8244985309 | -0.998692655  |
| C  | -3.3738403404 | -2.3560776018 | 1.555658402   |
| H  | -1.8081143181 | -1.0756181624 | 2.2621907403  |
| C  | -3.5036427817 | -2.6753465026 | -0.8279805402 |
| H  | -2.0589888104 | -1.616166651  | -2.0092836039 |
| C  | -3.9935351726 | -2.9438556999 | 0.4523468322  |
| H  | -3.7462269372 | -2.5531844902 | 2.5589303511  |
| H  | -3.978791115  | -3.1250267735 | -1.6975022456 |
| H  | -4.8481305882 | -3.6020023462 | 0.5873538135  |
| C  | -3.1846234942 | 1.7017565957  | -0.2793078482 |
| H  | -3.135792212  | 1.9232635842  | 0.7886020435  |
| H  | -3.7069273545 | 2.511476212   | -0.7944577135 |
| H  | -3.713817689  | 0.758986139   | -0.4279019448 |
| H  | 0.8174534899  | 1.1674631119  | -0.2672580478 |
| Si | 0.3150092185  | 2.8081663397  | 0.0572722594  |
| C  | 1.1517048877  | 3.5333940008  | -1.4786845381 |
| H  | 1.3848154365  | 4.5900431979  | -1.2941713569 |
| H  | 2.0889543875  | 3.0146079766  | -1.7065831024 |
| C  | -0.9517190411 | 4.0674631783  | 0.7534103541  |
| H  | -1.6553263472 | 4.4132361321  | -0.0114927628 |
| H  | -0.4219212997 | 4.9410409863  | 1.1569413699  |
| C  | 1.5498547759  | 2.8045375764  | 1.5226119122  |
| H  | 1.7896972667  | 3.8423444697  | 1.7904834073  |
| H  | 1.1158966373  | 2.3416473463  | 2.4182284636  |
| H  | 0.5070235499  | 3.4811112419  | -2.3612435482 |
| H  | -1.5382095883 | 3.6435435576  | 1.5785663436  |
| H  | 2.4840625039  | 2.2845878168  | 1.2886267573  |
| C  | 1.048586683   | -1.3396234907 | 0.8679594286  |
| C  | 1.0433266648  | -1.5658981257 | -0.5001808693 |

|   |              |               |               |
|---|--------------|---------------|---------------|
| C | 2.126099142  | -0.7374559705 | 1.7501487326  |
| H | 0.3453987249 | -1.9534796663 | 1.4281744255  |
| C | 2.0752369328 | -1.1660773356 | -1.5342394464 |
| H | 0.3756472789 | -2.3561861415 | -0.8419511677 |
| C | 3.5125964786 | -0.4756816397 | 1.123870411   |
| H | 2.2601256907 | -1.4442999446 | 2.5816250969  |
| H | 1.7630023094 | 0.1860726485  | 2.215343693   |
| C | 3.2113890688 | -2.2028115679 | -1.6619881942 |
| H | 2.481045788  | -0.1739496363 | -1.3380390693 |
| H | 1.5731882232 | -1.0979452354 | -2.5077170467 |
| C | 4.2239923815 | -1.7359647769 | 0.6771513335  |
| H | 3.428484125  | 0.2531847237  | 0.3147993514  |
| H | 4.1268002108 | 0.0090796182  | 1.8928338255  |
| C | 4.0899203802 | -2.4355646791 | -0.4569351783 |
| H | 2.7735677521 | -3.1701603472 | -1.9503786384 |
| H | 3.8467279501 | -1.9152176004 | -2.51465092   |
| H | 4.9284563082 | -2.1367172142 | 1.406698097   |
| H | 4.7156900937 | -3.3245019505 | -0.5517421647 |

37

**5B** B3LYP/BSI Optimized geometry (charge = 0, singlet)

|    |               |               |               |
|----|---------------|---------------|---------------|
| Ni | -1.5322847819 | 0.7593729549  | -0.0190712105 |
| S  | -3.6289869646 | 0.7549073846  | -0.1890952164 |
| C  | -1.3610372844 | -1.0823710942 | -0.0206317025 |
| C  | -4.4564636787 | -0.8806688597 | -0.2425241638 |
| C  | -1.1848257278 | -1.7598119689 | 1.1998442105  |
| C  | -1.0560563258 | -1.7718686121 | -1.2084251978 |
| H  | -4.1390816635 | -1.4661373515 | -1.1077372944 |
| H  | -4.2742779742 | -1.4548057043 | 0.6682184085  |
| H  | -5.5280119481 | -0.6706739698 | -0.3250602087 |
| C  | -0.6856940676 | -3.0656301809 | 1.2343019306  |
| H  | -1.449492216  | -1.2741102777 | 2.1371657456  |
| C  | -0.557488927  | -3.0777689877 | -1.1762107038 |
| H  | -1.2195545355 | -1.2953743098 | -2.1730122539 |
| C  | -0.3678661683 | -3.726652548  | 0.0459343138  |
| H  | -0.5517734913 | -3.5686430929 | 2.189532847   |
| H  | -0.3230526158 | -3.5904823311 | -2.1065731614 |
| H  | 0.0128959353  | -4.744541731  | 0.0713209449  |
| C  | 2.2824728371  | 3.5110761661  | 0.4766099977  |
| C  | 2.2850659146  | 3.0758319604  | -0.789395689  |
| C  | 1.4885729731  | 3.0715261014  | 1.679200045   |
| H  | 2.9786483384  | 4.3192565645  | 0.7069120005  |
| C  | 1.4398973498  | 2.0122570044  | -1.4609733424 |
| H  | 2.9706794272  | 3.5873088895  | -1.4653131036 |
| C  | 0.3627783154  | 2.0378962094  | 1.4776908792  |
| H  | 1.0579387075  | 3.9674209213  | 2.151177786   |
| H  | 2.1906580175  | 2.6673659277  | 2.425325093   |
| C  | 0.0160181805  | 2.4925796047  | -1.8095514077 |
| H  | 1.391443208   | 1.0850138723  | -0.8813564135 |
| H  | 1.9294132948  | 1.7364660466  | -2.4020756731 |
| C  | -0.8357451645 | 2.5480561516  | 0.6893104571  |
| H  | 0.7833038155  | 1.1243485813  | 1.0409498959  |
| H  | 0.0005782886  | 1.742963267   | 2.4691767073  |
| C  | -0.9764523475 | 2.6821220406  | -0.6781574214 |
| H  | 0.0954327486  | 3.4614827151  | -2.3246712234 |
| H  | -0.4256655379 | 1.810550629   | -2.5504235531 |
| H  | -1.6061255345 | 3.0161274525  | 1.300371753   |
| H  | -1.8787593971 | 3.199673575   | -1.0027930753 |

51

**TS<sub>5B-6B</sub>** B3LYP/BSI Optimized geometry (charge = 0, singlet)

|    |               |               |               |
|----|---------------|---------------|---------------|
| Ni | -0.8330153419 | -0.0406958332 | -0.0343083318 |
| S  | -2.921510166  | 0.3021954371  | 0.1450992486  |
| C  | -1.0662530039 | -1.8951318596 | -0.0996981389 |
| C  | -4.0305308091 | -1.155300571  | 0.0866440442  |
| C  | -1.05554866   | -2.691304023  | 1.060957893   |
| C  | -1.0722619447 | -2.5577605949 | -1.3412794527 |
| H  | -3.933090362  | -1.7017139507 | -0.8535471574 |
| H  | -3.8520523645 | -1.8371705513 | 0.9201986183  |
| H  | -5.045970779  | -0.7519776412 | 0.1632989806  |
| C  | -1.0157492073 | -4.08767426   | 0.986408723   |
| H  | -1.0932225687 | -2.2209923049 | 2.0419131466  |
| C  | -1.0342547333 | -3.9541267242 | -1.4224119082 |
| H  | -1.1210483314 | -1.9844832165 | -2.2655645952 |
| C  | -1.0033288087 | -4.7242942409 | -0.2574399987 |
| H  | -1.0078571354 | -4.678889639  | 1.8998157273  |
| H  | -1.0392336552 | -4.440092222  | -2.3958590157 |
| H  | -0.9850904415 | -5.8096001177 | -0.3176883486 |
| Si | 2.8786857732  | -1.8094965647 | 0.1526445943  |
| H  | 1.7315109811  | -0.8664954998 | -0.1004975993 |
| C  | 4.4931687743  | -0.8253384418 | 0.0196037613  |
| C  | 2.6896371141  | -2.5145076251 | 1.8951802972  |
| C  | 2.8281415102  | -3.1698948324 | -1.154803041  |
| H  | 5.355185233   | -1.4800972252 | 0.1999119995  |
| H  | 4.6193609325  | -0.3827309846 | -0.9753582746 |
| H  | 4.5407954175  | -0.0131745289 | 0.7549361018  |
| H  | 2.6980984351  | -1.7224428709 | 2.6536088037  |
| H  | 3.5101459158  | -3.2046339701 | 2.1281937547  |
| H  | 1.747316548   | -3.0639724948 | 1.9906297177  |
| H  | 3.6456800384  | -3.8860514066 | -1.0036546731 |
| H  | 1.8814739583  | -3.718598407  | -1.1129388531 |
| H  | 2.932548677   | -2.7569365489 | -2.1653030973 |
| C  | 2.0483375116  | 3.9977639628  | 0.518470084   |
| C  | 2.3183929071  | 3.6000846622  | -0.7314995348 |
| C  | 1.6444211362  | 3.1933906384  | 1.7336885722  |
| H  | 2.1240534939  | 5.0680368635  | 0.7151919176  |
| C  | 2.3128517023  | 2.1936490394  | -1.2864756116 |
| H  | 2.5663423465  | 4.3813019985  | -1.4503519941 |
| C  | 1.0291344935  | 1.7925910438  | 1.5008661332  |
| H  | 0.9182849896  | 3.794221328   | 2.2995847183  |
| H  | 2.5106663699  | 3.0866707257  | 2.4059884172  |
| C  | 0.9234217822  | 1.6905576782  | -1.7521131594 |
| H  | 2.7397935298  | 1.4910958718  | -0.5685972768 |
| H  | 2.9757965657  | 2.1579047522  | -2.1602713488 |
| C  | -0.1921474009 | 1.8615448501  | 0.6101834844  |
| H  | 1.7791475055  | 1.1065716666  | 1.1061207875  |
| H  | 0.7343445144  | 1.3905857214  | 2.4784769552  |
| C  | -0.2315720392 | 1.8300067337  | -0.7679542072 |
| H  | 0.6337547393  | 2.2517717522  | -2.6492884079 |
| H  | 1.0292068454  | 0.6477560939  | -2.0870753023 |
| H  | -1.0741378653 | 2.2652536442  | 1.1060281218  |
| H  | -1.1527826037 | 2.188691057   | -1.2225356849 |

51

**6B** B3LYP/BSI Optimized geometry (charge = 0, singlet)

|    |               |               |               |
|----|---------------|---------------|---------------|
| Ni | -0.0791169201 | -0.2907949469 | 0.0358564229  |
| S  | 0.3308611661  | -2.3480038739 | -0.4294992762 |
| C  | -1.9360284159 | -0.6227893256 | 0.0062719673  |
| C  | -2.6993195809 | -0.4578738979 | -1.1635474843 |
| C  | -2.6332214833 | -0.8830779353 | 1.1997642912  |
| C  | -4.0977259807 | -0.5201643464 | -1.1402043789 |
| H  | -2.2009472367 | -0.2942113418 | -2.1178080147 |
| C  | -4.029982557  | -0.9521095016 | 1.229439155   |
| H  | -2.0842665367 | -1.043552278  | 2.1260399769  |
| C  | -4.7697422276 | -0.7649171822 | 0.0590306782  |
| H  | -4.6602869282 | -0.3867597197 | -2.0620840504 |
| H  | -4.5408966467 | -1.1552737331 | 2.1684759569  |
| H  | -5.8552120265 | -0.8212946234 | 0.0796017195  |
| C  | -1.1034773148 | -3.4446968812 | -0.7370698364 |
| H  | -0.6801689197 | -4.4336355958 | -0.9415903396 |
| H  | -1.7576886582 | -3.5086912691 | 0.134762345   |
| H  | -1.6895546033 | -3.1222751234 | -1.6002260911 |
| H  | -0.519562347  | 1.3594456086  | 0.5954770506  |
| Si | -1.0875735441 | 2.7399199321  | 0.2914966678  |
| C  | -2.7439397192 | 2.8514288809  | 1.1717572806  |
| H  | -2.6307560692 | 2.7073711028  | 2.2521375271  |
| H  | -3.1986228141 | 3.8372028269  | 1.0112281403  |
| C  | 0.1864023773  | 3.9409644382  | 1.0024090727  |
| H  | 1.1702943567  | 3.8135257622  | 0.5359229507  |
| H  | -0.1263171291 | 4.9789915173  | 0.8323246895  |
| C  | -1.2486211329 | 2.9627903249  | -1.5716753577 |
| H  | -1.6293673079 | 3.9680757328  | -1.7931248742 |
| H  | -0.2877577492 | 2.8540400071  | -2.0872704528 |
| H  | -3.4355273174 | 2.0881263818  | 0.8016229267  |
| H  | -1.9506187276 | 2.2376499977  | -1.9946213654 |
| H  | 0.3075876026  | 3.8071338554  | 2.0836225807  |
| C  | 1.8598572946  | 0.5389727624  | -0.5038924291 |
| C  | 1.8736130104  | 0.2132451097  | 0.8316279688  |
| C  | 2.6002590464  | -0.0856219515 | -1.6738313434 |
| H  | 1.4962276383  | 1.5417402552  | -0.7341353789 |
| C  | 2.6287289658  | -0.8954649999 | 1.5319275446  |
| H  | 1.541168265   | 0.9976371947  | 1.5143562164  |
| C  | 3.7644439025  | -1.0466377454 | -1.349508482  |
| H  | 3.000200974   | 0.752393431   | -2.2629439534 |
| H  | 1.8902670639  | -0.6049972471 | -2.3283308011 |
| C  | 4.0747530901  | -0.4814814378 | 1.8770193192  |
| H  | 2.6151021518  | -1.8213604556 | 0.960483949   |
| H  | 2.1092583246  | -1.1243790101 | 2.470577091   |
| C  | 4.8957778073  | -0.398259182  | -0.579669595  |
| H  | 3.377567928   | -1.9358185616 | -0.8487116821 |
| H  | 4.1606579761  | -1.4005614035 | -2.309331405  |
| C  | 5.0103951471  | -0.1666556119 | 0.7347038189  |
| H  | 4.0446435546  | 0.3990160656  | 2.5373454773  |
| H  | 4.5219706698  | -1.2786870222 | 2.4918913523  |
| H  | 5.7238690313  | -0.051981184  | -1.1995027311 |
| H  | 5.9294095497  | 0.3243692004  | 1.0598181855  |

51

**TS<sub>6B-8</sub>** B3LYP/BSI Optimized geometry (charge = 0, singlet)

|    |                 |                 |                 |
|----|-----------------|-----------------|-----------------|
| Ni | -0.164256040973 | 0.068507637015  | -0.208161871228 |
| S  | 0.187384422533  | -1.836432408538 | -1.281790764450 |
| C  | -2.016362069395 | -0.447038175629 | 0.319615433256  |
| C  | -3.109840079837 | -0.332100724359 | -0.557149442353 |

|    |                 |                 |                 |
|----|-----------------|-----------------|-----------------|
| C  | -2.206430840503 | -1.155478304923 | 1.519856920909  |
| C  | -4.330102458447 | -0.947679944298 | -0.272273665017 |
| H  | -3.002678367889 | 0.225124871888  | -1.484826479597 |
| C  | -3.425790549406 | -1.771442577302 | 1.805991711856  |
| H  | -1.393625695816 | -1.236457419453 | 2.237564778385  |
| C  | -4.492784665028 | -1.673024668171 | 0.909918578871  |
| H  | -5.154234934921 | -0.860089441057 | -0.976117177910 |
| H  | -3.543569266028 | -2.326064514423 | 2.733829738313  |
| H  | -5.443761086302 | -2.148096803774 | 1.134979972983  |
| C  | -1.225050270560 | -3.001344360928 | -1.296474924437 |
| H  | -0.889244669942 | -3.890334056186 | -1.838693521289 |
| H  | -1.517822781351 | -3.296878990399 | -0.285777454724 |
| H  | -2.096678993807 | -2.584464127363 | -1.807115142638 |
| H  | -1.304613430016 | 0.766448315375  | 0.520697435858  |
| Si | -0.813953106572 | 2.436909989796  | -0.085383025731 |
| C  | -2.511642639731 | 2.990892069704  | 0.562483917540  |
| H  | -2.585447438186 | 2.889389636421  | 1.651621636505  |
| H  | -2.674964250800 | 4.048106111466  | 0.315186083468  |
| C  | 0.454605451794  | 3.558460476535  | 0.776635514960  |
| H  | 1.494652240030  | 3.391765926781  | 0.481799398211  |
| H  | 0.205170968812  | 4.599473693463  | 0.531058387904  |
| C  | -0.825368051132 | 2.724623846265  | -1.965080851254 |
| H  | -1.063501470431 | 3.779014911939  | -2.162535442881 |
| H  | 0.128946960216  | 2.495014529420  | -2.448285310296 |
| H  | -3.329637485193 | 2.412105943086  | 0.122303872453  |
| H  | -1.597055006885 | 2.118576301899  | -2.452807414377 |
| H  | 0.389314143303  | 3.462388274139  | 1.866843814490  |
| C  | 1.909377608199  | 0.674191563812  | -0.583878598262 |
| C  | 1.666146055127  | 0.399917339500  | 0.751204308511  |
| C  | 2.776925143306  | -0.067415554942 | -1.589901520511 |
| H  | 1.770712489949  | 1.716986756970  | -0.862776836235 |
| C  | 2.084510628077  | -0.820381857036 | 1.543344875922  |
| H  | 1.442288227957  | 1.258342033707  | 1.382815956718  |
| C  | 3.752213418497  | -1.134528430194 | -1.043132546457 |
| H  | 3.368280221781  | 0.709203732774  | -2.095832965921 |
| H  | 2.158831624856  | -0.530966180708 | -2.366509091720 |
| C  | 3.478548106215  | -0.636215793954 | 2.183171137065  |
| H  | 2.037542145719  | -1.721320111382 | 0.935683696300  |
| H  | 1.364176047455  | -0.969952962067 | 2.358642683628  |
| C  | 4.769149522016  | -0.597798185262 | -0.059551480249 |
| H  | 3.184603575388  | -1.972662445486 | -0.636285973376 |
| H  | 4.291623076693  | -1.539320611224 | -1.908596766428 |
| C  | 4.649069232246  | -0.395872794148 | 1.259099394631  |
| H  | 3.432627958385  | 0.206047340342  | 2.890250036043  |
| H  | 3.686671708228  | -1.518745342866 | 2.808608229897  |
| H  | 5.727799753627  | -0.321530234807 | -0.500770456196 |
| H  | 5.526587918740  | 0.000651718581  | 1.772580208860  |

39

**8** B3LYP/BSI Optimized geometry (charge = 0, singlet)

|    |               |               |               |
|----|---------------|---------------|---------------|
| Ni | -1.1415669267 | 0.6737439191  | 0.5065893797  |
| S  | 0.3878075268  | 1.045296048   | 1.9592945115  |
| C  | 1.0808880922  | -0.6682254825 | 2.0595991353  |
| H  | 0.3179917613  | -1.4217154898 | 2.2756446707  |
| H  | 1.6044720815  | -0.9402103306 | 1.1383636085  |
| H  | 1.8059514401  | -0.6780860034 | 2.8782595152  |
| Si | -0.3810824105 | 2.3591058313  | -0.7364659922 |
| C  | 1.0711218865  | 1.7582757363  | -1.8028957165 |

|   |               |               |               |
|---|---------------|---------------|---------------|
| H | 0.8031535401  | 0.8874055249  | -2.4125051128 |
| H | 1.388040509   | 2.5572298779  | -2.4872156631 |
| C | -1.7685465907 | 2.9633315103  | -1.9023932524 |
| H | -2.6085214177 | 3.3876784387  | -1.3396546025 |
| H | -1.3617526599 | 3.7681858799  | -2.5305661806 |
| C | 0.1188501969  | 3.9040517563  | 0.2444489638  |
| H | 0.3273248075  | 4.7269946695  | -0.4533184963 |
| H | -0.6864422013 | 4.2357872399  | 0.9104810731  |
| H | 1.9271690794  | 1.4862484768  | -1.176889813  |
| H | 1.0075242856  | 3.7258587791  | 0.855180983   |
| H | -2.1651657342 | 2.1939591462  | -2.5733853633 |
| C | -3.0046362198 | 0.2689246465  | -0.0549637386 |
| C | -2.0785464956 | -0.3466684281 | -0.9083029428 |
| C | -3.791850783  | -0.3032886095 | 1.1188184674  |
| H | -3.4612820043 | 1.1759153153  | -0.4516022946 |
| C | -1.529473449  | -1.761788376  | -0.8357002813 |
| H | -1.9674657671 | 0.0988875298  | -1.8959284531 |
| C | -3.7027830387 | -1.8204350743 | 1.3917244368  |
| H | -4.847876043  | -0.0558878025 | 0.9383165619  |
| H | -3.5253472059 | 0.2368674787  | 2.0400783869  |
| C | -2.443036272  | -2.8211802505 | -1.4851904722 |
| H | -1.295113655  | -2.056060614  | 0.1909897578  |
| H | -0.5711808111 | -1.776628835  | -1.3706668982 |
| C | -4.3169382438 | -2.6692825116 | 0.2985065894  |
| H | -2.6693341823 | -2.1091815784 | 1.6032576159  |
| H | -4.2516773464 | -2.0122815512 | 2.3215852683  |
| C | -3.8004438613 | -3.0613153995 | -0.872905625  |
| H | -2.5934678151 | -2.5479709806 | -2.5404696142 |
| H | -1.8969588602 | -3.7775792462 | -1.5157154439 |
| H | -5.3452406217 | -2.9745176678 | 0.4944121369  |
| H | -4.4501095906 | -3.667308573  | -1.5065641053 |

51

**6C** B3LYP/BSI Optimized geometry (charge = 0, singlet)

|    |               |               |               |
|----|---------------|---------------|---------------|
| Ni | -0.1013788135 | -0.1991643379 | 0.1095226902  |
| S  | 0.6377530681  | -2.3145267735 | -0.358631995  |
| C  | -1.0301836625 | 1.4352979151  | 0.47902142    |
| C  | -1.4770719164 | 2.3089891499  | -0.5266938271 |
| C  | -1.3510452732 | 1.7737424614  | 1.8066528841  |
| C  | -2.2226276742 | 3.45688446    | -0.2285301529 |
| H  | -1.2496420951 | 2.1023184537  | -1.5723288714 |
| C  | -2.0890657086 | 2.9200278354  | 2.1158962066  |
| H  | -1.0261486712 | 1.1322032419  | 2.6259059801  |
| C  | -2.5311809097 | 3.7668089764  | 1.096231964   |
| H  | -2.5565852032 | 4.1089970827  | -1.0329113459 |
| H  | -2.3205442912 | 3.1516063445  | 3.1535061553  |
| H  | -3.1054876964 | 4.6588459363  | 1.3329123061  |
| C  | 0.4040588262  | -3.1927450056 | 1.2384727048  |
| H  | -0.6199255104 | -3.1035034323 | 1.6185070964  |
| H  | 0.6195145295  | -4.2540839683 | 1.0830727745  |
| H  | 1.0903730547  | -2.817396774  | 2.005908843   |
| H  | -1.5823079851 | -0.9401414709 | 0.5303005691  |
| Si | -2.8531501185 | -1.3269007255 | -0.2521127994 |
| C  | -3.0754036555 | -3.1708546241 | 0.0461344774  |
| H  | -3.2126652698 | -3.4065696117 | 1.1070639075  |
| H  | -3.9619643814 | -3.5304358847 | -0.4920445371 |
| C  | -4.2257083857 | -0.298087355  | 0.5242325333  |
| H  | -4.318244949  | -0.4992692295 | 1.5974493758  |

|   |               |               |               |
|---|---------------|---------------|---------------|
| H | -5.1894448589 | -0.5370904546 | 0.0561396869  |
| C | -2.6439376877 | -0.9631048906 | -2.0867167697 |
| H | -3.5531573193 | -1.2724806995 | -2.6190007862 |
| H | -2.4924128569 | 0.1027984876  | -2.2832487371 |
| H | -2.2036182127 | -3.718248706  | -0.3252336454 |
| H | -4.0378236949 | 0.772342131   | 0.3962855029  |
| H | -1.8019991154 | -1.5269119106 | -2.5005979421 |
| C | 1.5059768825  | 0.7843848998  | -0.774196224  |
| C | 1.6886207171  | 0.7043500398  | 0.6041887697  |
| C | 2.2648970606  | 0.0904045588  | -1.893387378  |
| H | 1.0006996767  | 1.6908624211  | -1.1028873638 |
| C | 2.6631940616  | -0.1570571471 | 1.3733964119  |
| H | 1.3475881481  | 1.5733460132  | 1.1652313084  |
| C | 3.6437719351  | -0.5141400488 | -1.5444705879 |
| H | 2.4051499282  | 0.8514095632  | -2.6740670275 |
| H | 1.6509223109  | -0.6943717127 | -2.3517850525 |
| C | 4.0277804986  | 0.5497241462  | 1.5343377523  |
| H | 2.7731203484  | -1.1372893726 | 0.9145531721  |
| H | 2.257699337   | -0.3280052231 | 2.3796453517  |
| C | 4.6315829617  | 0.4861801398  | -0.9841537039 |
| H | 3.5022286709  | -1.3719527216 | -0.8857431297 |
| H | 4.0558800949  | -0.921424732  | -2.4762190095 |
| C | 4.7814790908  | 0.9142921085  | 0.2764546607  |
| H | 3.8800797853  | 1.4734175013  | 2.1136902235  |
| H | 4.6688201941  | -0.082794778  | 2.1685859812  |
| H | 5.3025234731  | 0.9272630496  | -1.7224149465 |
| H | 5.5748132627  | 1.6432466729  | 0.4496631229  |

51

TS<sub>6C-7B</sub> B3LYP/BSI Optimized geometry (charge = 0, singlet)

|    |               |               |               |
|----|---------------|---------------|---------------|
| Ni | 0.1291980812  | 0.1181029816  | -0.301363147  |
| S  | -0.5573864006 | 2.3008510899  | -0.7757007901 |
| C  | 1.2986157242  | -1.3623842435 | -0.1605015133 |
| C  | 1.7720896282  | -2.0352061185 | -1.300064249  |
| C  | 1.7553523303  | -1.8125088792 | 1.0900139887  |
| C  | 2.653050599   | -3.1161241305 | -1.1962714015 |
| H  | 1.4571758398  | -1.7157994757 | -2.2925016172 |
| C  | 2.6402171301  | -2.8912371638 | 1.2012145541  |
| H  | 1.4190776027  | -1.3242618864 | 2.0042416085  |
| C  | 3.0918092274  | -3.5491355547 | 0.0566497485  |
| H  | 3.0004589747  | -3.6172621922 | -2.0973709664 |
| H  | 2.9738785765  | -3.2165319003 | 2.1844422706  |
| H  | 3.7779057782  | -4.3882123814 | 0.1393251052  |
| C  | -1.6850253317 | 3.2335612294  | 0.3350033705  |
| H  | -1.5963795444 | 2.9147598569  | 1.3765403157  |
| H  | -1.4376617867 | 4.2964002517  | 0.2674773736  |
| H  | -2.7197853558 | 3.0979355963  | 0.0081572708  |
| H  | 1.4546861753  | 0.8628906255  | -0.5680698449 |
| Si | 1.7687821016  | 2.3639944183  | 0.2090015754  |
| C  | 1.88929543    | 4.2083226458  | -0.2496280505 |
| H  | 2.7947722037  | 4.6459600238  | 0.1924775674  |
| H  | 1.9582832649  | 4.3289272563  | -1.3369030357 |
| C  | 1.4108074827  | 2.1290423818  | 2.055780444   |
| H  | 0.4046492864  | 2.4328212209  | 2.3600171603  |
| H  | 2.1266199006  | 2.7464845532  | 2.614822441   |
| C  | 3.5711619247  | 1.7779372281  | -0.0680623421 |
| H  | 4.2699632241  | 2.4334536409  | 0.4700902742  |
| H  | 3.7119339622  | 0.7479178369  | 0.2756584404  |



|   |               |               |               |
|---|---------------|---------------|---------------|
| H | 1.0201890853  | 4.7819262896  | 0.0885834461  |
| H | 1.5696410253  | 1.0900082634  | 2.3637650462  |
| H | 3.8412779029  | 1.8110940648  | -1.1309244587 |
| C | -1.5382092325 | -1.0892137376 | -0.8130251788 |
| C | -1.4955244174 | -0.9120607342 | 0.5553761016  |
| C | -2.4912543862 | -0.5148113007 | -1.8440786728 |
| H | -0.9814020796 | -1.948862193  | -1.1811732702 |
| C | -2.415071221  | -0.0815228706 | 1.4201148633  |
| H | -0.9523560798 | -1.6777697975 | 1.108015651   |
| C | -3.8223662663 | 0.0839531589  | -1.3383647685 |
| H | -2.7273420726 | -1.3408328232 | -2.5291897555 |
| H | -1.9746932671 | 0.2383211921  | -2.4528951102 |
| C | -3.6939256575 | -0.8536001443 | 1.8124067986  |
| H | -2.6778975609 | 0.8598110115  | 0.9435729362  |
| H | -1.8852468959 | 0.1797710425  | 2.3455236356  |
| C | -4.6890650872 | -0.9003941413 | -0.5808870325 |
| H | -3.6282510824 | 0.9863880514  | -0.7549260753 |
| H | -4.3767271493 | 0.4227244894  | -2.2221295106 |
| C | -4.6249450493 | -1.27934105   | 0.7022998341  |
| H | -3.4017128191 | -1.7559533665 | 2.3696723677  |
| H | -4.2578626659 | -0.2440769722 | 2.5364162064  |
| H | -5.4592371913 | -1.3815386121 | -1.1844556253 |
| H | -5.3636711312 | -2.0144728316 | 1.0254857405  |

51

**7B** B3LYP/BSI Optimized geometry (charge = 0, singlet)

|    |               |               |               |
|----|---------------|---------------|---------------|
| Ni | 0.4160294368  | -0.2769157019 | -0.3420652799 |
| S  | 0.0922291376  | 2.0036278465  | -0.7505982163 |
| C  | 1.4340979674  | -1.8555676291 | -0.1736961194 |
| C  | 1.7272717194  | -2.6681635985 | -1.2836994792 |
| C  | 1.8724393227  | -2.3109793817 | 1.0833471831  |
| C  | 2.3953451156  | -3.8887062486 | -1.1434398288 |
| H  | 1.4362113824  | -2.3480334358 | -2.2830182088 |
| C  | 2.5402977997  | -3.5305453573 | 1.2310891277  |
| H  | 1.6926810802  | -1.7078536321 | 1.9727224853  |
| C  | 2.8040755746  | -4.3291588915 | 0.1166964957  |
| H  | 2.6001334358  | -4.494808901  | -2.0240379345 |
| H  | 2.8588404118  | -3.8545550474 | 2.2202586748  |
| H  | 3.3257088032  | -5.2766016223 | 0.2278284204  |
| C  | -1.4148765436 | 2.9893419506  | -0.347280522  |
| H  | -1.6474873145 | 2.9729498815  | 0.7199510542  |
| H  | -1.2735983394 | 4.020133646   | -0.6781275496 |
| H  | -2.2467253842 | 2.5550538624  | -0.9042998694 |
| H  | 1.8178917164  | 0.1788043869  | -0.4971599105 |
| Si | 1.6772576982  | 3.0136535246  | 0.4121430564  |
| C  | 1.2254951486  | 4.8489871449  | 0.4939942107  |
| H  | 2.0415213205  | 5.3940044142  | 0.9858856     |
| H  | 1.0989559643  | 5.2799952966  | -0.5057497181 |
| C  | 1.782850976   | 2.2892383281  | 2.1502507302  |
| H  | 0.8252907024  | 2.3555541036  | 2.6798451337  |
| H  | 2.5298124222  | 2.8339648337  | 2.7425357908  |
| C  | 3.2828086732  | 2.7918153303  | -0.5407969254 |
| H  | 4.103171271   | 3.2827903711  | -0.0009696544 |
| H  | 3.53213292    | 1.7334930228  | -0.6570349182 |
| H  | 0.3130011532  | 5.0405963025  | 1.068909438   |
| H  | 2.0808635262  | 1.2364558195  | 2.112636139   |
| H  | 3.2183630097  | 3.2415712546  | -1.5376970716 |
| C  | -1.4034056416 | -1.2303742408 | -0.8241147378 |

|   |               |               |               |
|---|---------------|---------------|---------------|
| C | -1.3093637227 | -1.0682875359 | 0.543289374   |
| C | -2.3535195788 | -0.5480985723 | -1.8007341826 |
| H | -0.9798769202 | -2.1539928328 | -1.2126848489 |
| C | -2.1421868599 | -0.1568802289 | 1.4138950253  |
| H | -0.8563380953 | -1.8926313802 | 1.0924092119  |
| C | -3.7215109329 | -0.0696093289 | -1.2449924059 |
| H | -2.552637413  | -1.2768038006 | -2.5968144569 |
| H | -1.8671219656 | 0.2979292185  | -2.3061003518 |
| C | -3.4364746089 | -0.8584596318 | 1.8921445806  |
| H | -2.3824354692 | 0.7779188772  | 0.9084161903  |
| H | -1.5647923655 | 0.1194586534  | 2.306641753   |
| C | -4.484022749  | -1.1128733726 | -0.4602827607 |
| H | -3.5915355902 | 0.8334736868  | -0.643438376  |
| H | -4.3293875636 | 0.2376122701  | -2.1057251381 |
| C | -4.3620793762 | -1.4227285512 | 0.8368307219  |
| H | -3.1484288823 | -1.6885030667 | 2.5528580917  |
| H | -3.9979690538 | -0.1634373605 | 2.5373471759  |
| H | -5.2141834873 | -1.6837645729 | -1.0343485233 |
| H | -5.0231608317 | -2.2041851032 | 1.2140883234  |

51

TS<sub>6C-8B</sub> B3LYP/BSI Optimized geometry (charge = 0, singlet)

|    |               |               |               |
|----|---------------|---------------|---------------|
| Ni | -0.1205842548 | 0.2949049558  | -0.0956151255 |
| S  | 2.1048558474  | 0.7317741511  | 0.028836857   |
| C  | -2.0879346843 | 0.2810079777  | -0.0748491545 |
| C  | -2.8569581085 | -0.3180983697 | -1.087867391  |
| C  | -2.7534558123 | 0.6825074064  | 1.0975274942  |
| C  | -4.2195660765 | -0.57077243   | -0.9111874472 |
| H  | -2.3867839571 | -0.6013762273 | -2.0279256394 |
| C  | -4.1160547251 | 0.4341046709  | 1.2786066859  |
| H  | -2.2032121937 | 1.1912222549  | 1.887563225   |
| C  | -4.8536429177 | -0.1992693538 | 0.2761043059  |
| H  | -4.7868196566 | -1.0526564352 | -1.7039633329 |
| H  | -4.6029625749 | 0.740586238   | 2.2013628566  |
| H  | -5.9148349777 | -0.3890122758 | 0.4130827472  |
| C  | 2.2164137183  | 1.8974516903  | 1.4471974114  |
| H  | 3.2700949412  | 2.164508149   | 1.5724438322  |
| H  | 1.6501016857  | 2.8169350079  | 1.2732705088  |
| H  | 1.8677166567  | 1.4488742466  | 2.3833832838  |
| H  | -1.1065727955 | 1.3131587178  | -0.5590890592 |
| Si | 0.0477479266  | 2.1296371349  | -1.7063533163 |
| C  | -1.6078883988 | 2.7660295697  | -2.4248431529 |
| H  | -2.1856444306 | 3.3447602786  | -1.6942520827 |
| H  | -1.3979906774 | 3.4247249763  | -3.2785625295 |
| C  | 0.962352359   | 3.7046396486  | -1.1965708957 |
| H  | 2.0168277213  | 3.5220783778  | -0.9835461663 |
| H  | 0.8880771742  | 4.4191846443  | -2.0271730369 |
| C  | 0.851895857   | 1.1951718243  | -3.1479674693 |
| H  | 0.8985035622  | 1.8681490434  | -4.0151806555 |
| H  | 1.862402952   | 0.8553224583  | -2.9104299221 |
| H  | -2.2522243004 | 1.9553687618  | -2.7815289813 |
| H  | 0.2486496768  | 0.3287035375  | -3.4455196292 |
| H  | 0.5002418029  | 4.1812704658  | -0.3244678426 |
| C  | -0.0525420706 | -1.5341676628 | 1.2570078034  |
| C  | -0.0047183723 | -1.9097348797 | -0.058723356  |
| C  | 1.0110874039  | -1.6056782878 | 2.33084138    |
| H  | -1.0526165839 | -1.3705258232 | 1.655365217   |
| C  | 1.1670213329  | -2.4545364979 | -0.8412345194 |

|   |               |               |               |
|---|---------------|---------------|---------------|
| H | -0.9693265097 | -2.0610190787 | -0.53989288   |
| C | 2.2574502261  | -2.474945226  | 2.0576541203  |
| H | 0.5050759774  | -1.9948217757 | 3.2264789918  |
| H | 1.3428245879  | -0.5948975658 | 2.5957473247  |
| C | 1.3055392977  | -3.9861323145 | -0.6947686539 |
| H | 2.094388751   | -1.9519476424 | -0.5692483819 |
| H | 1.0039841918  | -2.2384042496 | -1.9051484291 |
| C | 1.9452961486  | -3.9361914337 | 1.8142501361  |
| H | 2.8348861277  | -2.032306501  | 1.2446214097  |
| H | 2.8964621879  | -2.4042628854 | 2.9468884652  |
| C | 1.5555071603  | -4.5435078818 | 0.6860075076  |
| H | 0.3929985856  | -4.4608376582 | -1.0857121196 |
| H | 2.1098644324  | -4.3231413886 | -1.3677324727 |
| H | 2.0362319908  | -4.5737967036 | 2.6944625232  |
| H | 1.3892893048  | -5.6203099094 | 0.7478667456  |

39

**8B** B3LYP/BSI Optimized geometry (charge = 0, singlet)

|    |               |               |               |
|----|---------------|---------------|---------------|
| Ni | -0.6562480225 | -0.7576221229 | 0.4350101463  |
| S  | -0.2290665338 | -1.7087852411 | 2.2921654048  |
| C  | 1.5077167881  | -1.4245889484 | 2.8350392676  |
| H  | 1.5843582821  | -1.7782491132 | 3.866704821   |
| H  | 2.2101864707  | -1.9923914913 | 2.2208948954  |
| H  | 1.7777738845  | -0.3659369558 | 2.8081212145  |
| Si | 0.2979308174  | -2.2256024901 | -0.9328675098 |
| C  | 0.7880188668  | -1.3867468689 | -2.576606092  |
| H  | 1.5754859496  | -0.638421758  | -2.4262952609 |
| H  | 1.1930377693  | -2.150810733  | -3.2544892199 |
| C  | 1.8865311007  | -3.0640961055 | -0.3216235556 |
| H  | 1.6989048507  | -3.6743818151 | 0.567025211   |
| H  | 2.2789527596  | -3.7182113317 | -1.1125860634 |
| C  | -0.9848013787 | -3.5815343959 | -1.2979051921 |
| H  | -0.5697256201 | -4.300348039  | -2.0177613633 |
| H  | -1.2447707923 | -4.1292813037 | -0.3857933336 |
| H  | -1.9098459338 | -3.1793182191 | -1.7261932536 |
| H  | 2.6722052828  | -2.3382856773 | -0.081847138  |
| C  | -0.9749483921 | 0.8959372214  | -0.6309529067 |
| C  | -1.9800870765 | -0.0425801669 | -0.8816296652 |
| C  | -0.9530736187 | 2.0860245251  | 0.3171751043  |
| H  | -0.2151316363 | 0.9759501392  | -1.408960908  |
| C  | -3.3301256327 | -0.1950067624 | -0.2019539706 |
| H  | -1.9289031918 | -0.5431302722 | -1.84784091   |
| C  | -2.2296608755 | 2.4025950553  | 1.12376128    |
| H  | -0.7056024543 | 2.9680108322  | -0.2918255684 |
| H  | -0.109348254  | 1.9754615542  | 1.0158951625  |
| C  | -4.4166916273 | 0.7605607507  | -0.7343000642 |
| H  | -3.2507596278 | -0.0963030746 | 0.8840623162  |
| H  | -3.6737103753 | -1.2220848834 | -0.377517113  |
| C  | -3.3707981851 | 2.9117127067  | 0.2671621026  |
| H  | -2.5143382855 | 1.5383005582  | 1.7299596506  |
| H  | -1.9697708819 | 3.1874328619  | 1.8439880865  |
| C  | -4.2426841593 | 2.2389600655  | -0.4945797811 |
| H  | -4.5214437791 | 0.6031396789  | -1.818544815  |
| H  | -5.3844695028 | 0.4510177129  | -0.3088918576 |
| H  | -3.4638396688 | 3.9980421394  | 0.2508093985  |
| H  | -4.9716176073 | 2.8431992182  | -1.0373810529 |
| H  | -0.0456472989 | -0.89939353   | -3.0940275167 |

37

**TS<sup>3</sup><sub>5A-II</sub>** B3LYP/BSI Optimized geometry (charge = 0, triplet)

|    |                 |                 |                 |
|----|-----------------|-----------------|-----------------|
| Ni | 0.517073989078  | 0.570311474897  | -0.383269067530 |
| S  | 0.281521529752  | 2.705558804642  | -0.585659651076 |
| C  | 2.035430408530  | -0.538260687373 | -0.022915187924 |
| C  | 1.771413705873  | 3.351369605197  | 0.286814622624  |
| C  | 3.212767375452  | -0.385189076242 | -0.777789497615 |
| C  | 2.029166993206  | -1.530707677027 | 0.975885569289  |
| H  | 2.627296579714  | 2.685920165078  | 0.155646524278  |
| H  | 2.008723005190  | 4.332515521923  | -0.130810291171 |
| H  | 1.561080706511  | 3.460635472438  | 1.353887023708  |
| C  | 4.329478785182  | -1.198082144171 | -0.563793910359 |
| H  | 3.266858049231  | 0.379825394718  | -1.551356324857 |
| C  | 3.141495640333  | -2.348249453915 | 1.195602079661  |
| H  | 1.142963770601  | -1.680782187947 | 1.589982749551  |
| C  | 4.294997580064  | -2.182480272057 | 0.425852489543  |
| H  | 5.225338038293  | -1.062050615698 | -1.165522638890 |
| H  | 3.109650662943  | -3.111413184189 | 1.970196830838  |
| H  | 5.162720335221  | -2.814331409333 | 0.598804155170  |
| C  | -1.715987219991 | -2.090490549982 | 0.559557103957  |
| C  | -2.101143531665 | -1.222216934232 | 1.505513383835  |
| C  | -1.556006432168 | -1.915919526991 | -0.932236820916 |
| H  | -1.467436188124 | -3.096793614083 | 0.898964299589  |
| C  | -2.506253204209 | 0.229496413888  | 1.359976856505  |
| H  | -2.156764335044 | -1.611503272509 | 2.522360653723  |
| C  | -2.206178263848 | -0.682032425586 | -1.596713881828 |
| H  | -1.959913849659 | -2.816158762303 | -1.416011996119 |
| H  | -0.479605590039 | -1.928377591342 | -1.173581358780 |
| C  | -3.972495573942 | 0.437949544585  | 0.923110822479  |
| H  | -1.831196124570 | 0.767674320815  | 0.688593815860  |
| H  | -2.382640422437 | 0.721277608807  | 2.332492166748  |
| C  | -3.707461543412 | -0.604001341014 | -1.433475259047 |
| H  | -1.729689884339 | 0.239189094868  | -1.238555502572 |
| H  | -1.972163827730 | -0.724175125969 | -2.667509490436 |
| C  | -4.417416345497 | -0.145793215115 | -0.395556233187 |
| H  | -4.625311084739 | 0.021523205908  | 1.704294262388  |
| H  | -4.183714701193 | 1.518813513864  | 0.920709784379  |
| H  | -4.274765536653 | -0.993898999425 | -2.278621026865 |
| H  | -5.502692495862 | -0.186006075025 | -0.500086054361 |

17

**11<sup>3</sup>** B3LYP/BSI Optimized geometry (charge = 0, triplet)

|    |              |               |               |
|----|--------------|---------------|---------------|
| Ni | 2.0793445711 | -0.9205774134 | -0.2174352878 |
| S  | 2.5876032682 | -2.9945040102 | -0.5533810645 |
| C  | 2.2837452551 | 0.9652180476  | 0.0089884798  |
| C  | 2.9765749073 | -3.6713135027 | 1.1161930728  |
| C  | 2.3089381553 | 1.5568184549  | 1.2880749914  |
| C  | 2.3493343614 | 1.8389230671  | -1.0951881509 |
| H  | 3.8444479168 | -3.1650552239 | 1.5481747324  |
| H  | 2.1274332954 | -3.5815901279 | 1.7991964618  |
| H  | 3.2189930909 | -4.7291031003 | 0.9947204665  |
| C  | 2.3618883151 | 2.942013951   | 1.4601295536  |
| H  | 2.2847659049 | 0.9310755132  | 2.1803916795  |
| C  | 2.4029458236 | 3.2255758129  | -0.9367292868 |
| H  | 2.3596668385 | 1.4383655216  | -2.1087161892 |
| C  | 2.4088129163 | 3.7808614689  | 0.3447176079  |
| H  | 2.3723069337 | 3.3668461642  | 2.46135483    |

|   |              |              |               |
|---|--------------|--------------|---------------|
| H | 2.4461664757 | 3.8723380516 | -1.8101020461 |
| H | 2.4564229707 | 4.8593823255 | 0.4731801497  |

33

**TS<sup>3</sup><sub>11-23A</sub>** B3LYP/BSI Optimized geometry (charge = 0, triplet)

|    |               |               |               |
|----|---------------|---------------|---------------|
| Ni | 1.3228401979  | 1.5069321497  | 0.1095538016  |
| S  | 0.4906926259  | 3.424870166   | 0.669910332   |
| C  | 2.6227911483  | 0.1124155137  | -0.0142318654 |
| C  | -0.4107942382 | 3.1239226134  | 2.2487576842  |
| C  | 3.6620918808  | 0.166088248   | -0.9647203672 |
| C  | 2.5675750056  | -1.0322062877 | 0.806012907   |
| H  | -0.8891001609 | 4.0617761181  | 2.5390431805  |
| H  | -1.178537914  | 2.354823439   | 2.1310677545  |
| H  | 0.2840014743  | 2.8296127896  | 3.040027171   |
| C  | 4.5778140835  | -0.878199532  | -1.1151891696 |
| H  | 3.7708120245  | 1.0388139021  | -1.6089133418 |
| C  | 3.4790396108  | -2.0821602466 | 0.6655128367  |
| H  | 1.7943015387  | -1.1179890433 | 1.5683722062  |
| C  | 4.4872840095  | -2.0070172855 | -0.2979291979 |
| H  | 5.3643176316  | -0.8094650058 | -1.8633283629 |
| H  | 3.4082956829  | -2.9545288586 | 1.3115793519  |
| H  | 5.2020206969  | -2.819110025  | -0.4064261588 |
| S  | -1.4126358775 | -1.7586761122 | 1.1607306868  |
| C  | -2.6086792311 | -0.6561233998 | 0.3959450089  |
| C  | -0.7044257713 | -2.5826075874 | -0.3201194703 |
| C  | -2.1981558116 | 0.5859238963  | -0.1052523188 |
| C  | -3.9625978648 | -1.0099777252 | 0.3351309334  |
| H  | -1.4807030967 | -3.1140367648 | -0.8761412149 |
| H  | -0.2001325239 | -1.8621037267 | -0.9684148123 |
| H  | 0.0349649725  | -3.2994579714 | 0.046708195   |
| C  | -3.1236834018 | 1.4620604709  | -0.6714210902 |
| H  | -1.1488119486 | 0.8605687635  | -0.0406596856 |
| C  | -4.8894969256 | -0.1303667914 | -0.2291170769 |
| H  | -4.2833706906 | -1.9683654029 | 0.7322696673  |
| C  | -4.4725544587 | 1.1032829472  | -0.7337782537 |
| H  | -2.7904490304 | 2.4239518336  | -1.0510460441 |
| H  | -5.938827633  | -0.4098265456 | -0.2727021703 |
| H  | -5.197047005  | 1.7858814608  | -1.1694911166 |

41

**TS<sub>1-2</sub>** B3LYP/BSI Optimized geometry (charge = 0, singlet)

|    |               |               |               |
|----|---------------|---------------|---------------|
| Ni | -0.4091377593 | -0.4250266679 | 0.4335637675  |
| C  | 1.4399073466  | -0.4762057413 | 1.107968674   |
| C  | 1.2151114353  | -1.480146729  | 0.1185116133  |
| C  | 1.8389618584  | -1.6293061082 | -1.2729283754 |
| C  | 3.2407955064  | -0.9905354168 | -1.4641821606 |
| C  | 3.1969363545  | 0.418854114   | -2.0118261259 |
| C  | 2.7373702831  | 1.537234656   | -1.4395230917 |
| C  | 2.1921309464  | 1.7994862613  | -0.0587404023 |
| C  | 2.3446480355  | 0.7543901834  | 1.0624830127  |
| H  | 1.3915515943  | -0.8590222108 | 2.1330808629  |
| H  | 0.9962859727  | -2.459911947  | 0.5546564557  |
| H  | 1.1815583618  | -1.2497106343 | -2.0670074284 |
| H  | 1.9292047885  | -2.7067139922 | -1.4633226152 |
| H  | 3.7915939061  | -1.0446018659 | -0.5187550462 |
| H  | 3.8049698337  | -1.6052408335 | -2.1757600124 |
| H  | 3.5349178174  | 0.5164338206  | -3.0442397827 |

|   |               |               |               |
|---|---------------|---------------|---------------|
| H | 2.7497281035  | 2.4350190277  | -2.0613236007 |
| H | 1.1290394847  | 2.0680855971  | -0.1556127584 |
| H | 2.6778254927  | 2.722626461   | 0.2945154178  |
| H | 3.399704774   | 0.4438002126  | 1.1119680804  |
| H | 2.1668439618  | 1.2974312456  | 2.0007663103  |
| C | -1.970796335  | -1.5953196099 | -0.3282920001 |
| C | -1.3396283709 | 1.3623954058  | 1.0145003641  |
| C | -1.7958421003 | -0.4907095354 | -1.1379280793 |
| C | -2.9561839521 | -1.7174887083 | 0.8163008264  |
| H | -1.5216599007 | -2.5333570857 | -0.6500009918 |
| C | -1.7845866755 | 0.3281623794  | 1.8147063906  |
| C | -2.0285085157 | 1.8889283826  | -0.2285397189 |
| H | -0.5637547445 | 2.0094918207  | 1.4201600761  |
| C | -2.6401464698 | 0.7745242401  | -1.1202227027 |
| H | -1.1855638202 | -0.6297011869 | -2.0306156822 |
| C | -3.0996410033 | -0.4208585866 | 1.6602892151  |
| H | -2.6097907251 | -2.5288377332 | 1.4689377923  |
| H | -3.946463015  | -2.030483579  | 0.4499755831  |
| H | -1.2915956635 | 0.2070296501  | 2.7788606549  |
| H | -1.283626191  | 2.4415621994  | -0.8152071583 |
| H | -2.8062023691 | 2.6230461188  | 0.0344270266  |
| H | -3.6589805272 | 0.5441573728  | -0.7948996022 |
| H | -2.732828599  | 1.1541202475  | -2.1445685621 |
| H | -3.8576999133 | 0.2348335134  | 1.2219865083  |
| H | -3.4748642069 | -0.6889707383 | 2.6549052654  |

41

**2** B3LYP/BSI Optimized geometry (charge = 0, singlet)

|    |               |               |               |
|----|---------------|---------------|---------------|
| Ni | -0.4507227118 | -0.250231865  | 0.377875763   |
| C  | 1.445112579   | -0.0230815463 | 0.8715505719  |
| C  | 1.2803248406  | -0.9631588214 | -0.190085851  |
| C  | 1.6147397336  | -0.7981061504 | -1.6662397553 |
| C  | 3.0960944642  | -1.0370959511 | -2.0158746154 |
| C  | 4.1224550577  | -0.0742399732 | -1.4744636851 |
| C  | 3.9807847362  | 1.1066047303  | -0.8594352439 |
| C  | 2.7245030598  | 1.8532772758  | -0.4652589274 |
| C  | 2.1074233279  | 1.3558626377  | 0.8612191025  |
| H  | 1.5597530124  | -0.4970834624 | 1.8518233632  |
| H  | 1.3432762941  | -2.0128449856 | 0.1169628826  |
| H  | 1.2973625431  | 0.1735570005  | -2.0557808099 |
| H  | 1.027654924   | -1.5393805494 | -2.2271649526 |
| H  | 3.3732296981  | -2.0472215998 | -1.6756357356 |
| H  | 3.2008968125  | -1.0715552389 | -3.1134247063 |
| H  | 5.1484326085  | -0.41467785   | -1.6290607278 |
| H  | 4.9050283665  | 1.5989812281  | -0.5531973016 |
| H  | 1.9730042422  | 1.8411499682  | -1.2597600985 |
| H  | 2.9900367146  | 2.9096066524  | -0.3282802732 |
| H  | 2.9146076442  | 1.3423108207  | 1.6087192186  |
| H  | 1.4025382926  | 2.1212593021  | 1.2177010042  |
| C  | -1.9035845304 | -1.6263387389 | -0.2197501601 |
| C  | -1.5440536892 | 1.3994865265  | 1.0371290115  |
| C  | -1.958606506  | -0.5293273996 | -1.0567544386 |
| C  | -2.7559051245 | -1.8574563356 | 1.0119692853  |
| H  | -1.3639867667 | -2.5035628436 | -0.5740863564 |
| C  | -1.7772773872 | 0.3381274249  | 1.8897803039  |
| C  | -2.408850798  | 1.8128155164  | -0.137610085  |
| H  | -0.8200965617 | 2.1483332263  | 1.3561629144  |
| C  | -2.9552947244 | 0.6156015625  | -0.9616173848 |

|   |               |               |               |
|---|---------------|---------------|---------------|
| H | -1.4263205263 | -0.6069465975 | -2.0045125575 |
| C | -2.9908389384 | -0.5779024778 | 1.8621583187  |
| H | -2.2476130086 | -2.6061922411 | 1.6325741398  |
| H | -3.7255536986 | -2.3028404495 | 0.7395685725  |
| H | -1.1836203409 | 0.3008299703  | 2.8026891722  |
| H | -1.7981622587 | 2.4454557471  | -0.7941479961 |
| H | -3.2450088054 | 2.4472414576  | 0.1958345151  |
| H | -3.8990696583 | 0.2610475811  | -0.536563777  |
| H | -3.1958779632 | 0.9643988532  | -1.9728125847 |
| H | -3.8659081417 | -0.0339746952 | 1.4942076618  |
| H | -3.2349048119 | -0.8781447092 | 2.8879192228  |

41

**TS<sub>2,3</sub>** B3LYP/BSI Optimized geometry (charge = 0, singlet)

|    |               |               |               |
|----|---------------|---------------|---------------|
| Ni | -0.1237247425 | -0.9133561459 | -0.388895641  |
| C  | -1.9988117315 | -1.5193872106 | -0.3275684335 |
| C  | -1.524753083  | -1.1927301584 | 0.9562353758  |
| C  | -1.9188702412 | -0.0217245541 | 1.8541956725  |
| C  | -3.3873820176 | 0.4673458898  | 1.7164336431  |
| C  | -3.5732446015 | 1.6419902594  | 0.7790696138  |
| C  | -3.2892328933 | 1.7391980518  | -0.5252176465 |
| C  | -2.7726463213 | 0.7127427548  | -1.5034478699 |
| C  | -2.9920859243 | -0.7872498038 | -1.2191899753 |
| H  | -1.9575325573 | -2.5870884969 | -0.5660937791 |
| H  | -1.1669923166 | -2.0535771476 | 1.5290702431  |
| H  | -1.2540138321 | 0.8401638381  | 1.716742895   |
| H  | -1.7615243668 | -0.3513285919 | 2.888852864   |
| H  | -4.0221783927 | -0.3807357927 | 1.4324359638  |
| H  | -3.736090421  | 0.7788866001  | 2.7077008255  |
| H  | -3.9430010747 | 2.5502059766  | 1.255629119   |
| H  | -3.4476105013 | 2.7192479934  | -0.9785308196 |
| H  | -1.6971694428 | 0.8815106259  | -1.6716527555 |
| H  | -3.2485012456 | 0.9353856532  | -2.4689181675 |
| H  | -4.0164466411 | -0.9384418145 | -0.8466088701 |
| H  | -2.9613499869 | -1.2952172759 | -2.1916325413 |
| C  | 1.7832724924  | -1.0238615854 | -0.8743117298 |
| C  | 1.2999205012  | 0.2906268084  | -1.0073518533 |
| C  | 2.7000250307  | -1.6324956025 | 0.1806278004  |
| H  | 1.8018551274  | -1.5943525025 | -1.8081545111 |
| C  | 1.526460927   | 1.4877214154  | -0.0985378974 |
| H  | 1.0471717898  | 0.5888204449  | -2.0299037481 |
| C  | 3.3479157931  | -0.6759525317 | 1.2051327424  |
| H  | 3.5116872605  | -2.1516371264 | -0.3497954912 |
| H  | 2.1620228986  | -2.4206526517 | 0.7288049622  |
| C  | 2.8701722409  | 2.2042246813  | -0.3359589135 |
| H  | 1.4292978124  | 1.2218879356  | 0.9564351092  |
| H  | 0.7235298281  | 2.211693313   | -0.2914024156 |
| C  | 4.3454660145  | 0.2822975642  | 0.5891673673  |
| H  | 2.5738305936  | -0.152108763  | 1.7721729539  |
| H  | 3.8798565958  | -1.2953209996 | 1.9384096941  |
| C  | 4.1406977822  | 1.4441150562  | -0.0447676464 |
| H  | 2.909832374   | 2.5315339787  | -1.3863732605 |
| H  | 2.8800547103  | 3.1375298267  | 0.2506572144  |
| H  | 5.3817934397  | -0.0527903606 | 0.6491035442  |
| H  | 5.0332001232  | 1.9511124482  | -0.4165306374 |
